# Supplementary material for: A new entry to the construction of a quaternary carbon center having a fluorine atom – SN2′ reaction of γ-fluoroallylic alcohol derivatives with various cyanocuprates
Source: Royal Society of Chemistry journal article supplement (doi:10.1039/c2ob25718a), 2012-01-01

# *Supporting Information*

*A New Entry to the Construction of a Quaternary Carbon Center  
Having a Fluorine Atom –S<sub>N</sub>2' Reaction of  $\gamma$ -Fluoroallylic Alcohol  
Derivatives with Various Cyanocuprates–*

*Tsutomu Konno,\* Atsushi Ikemoto, and Takashi Ishihara*

auto

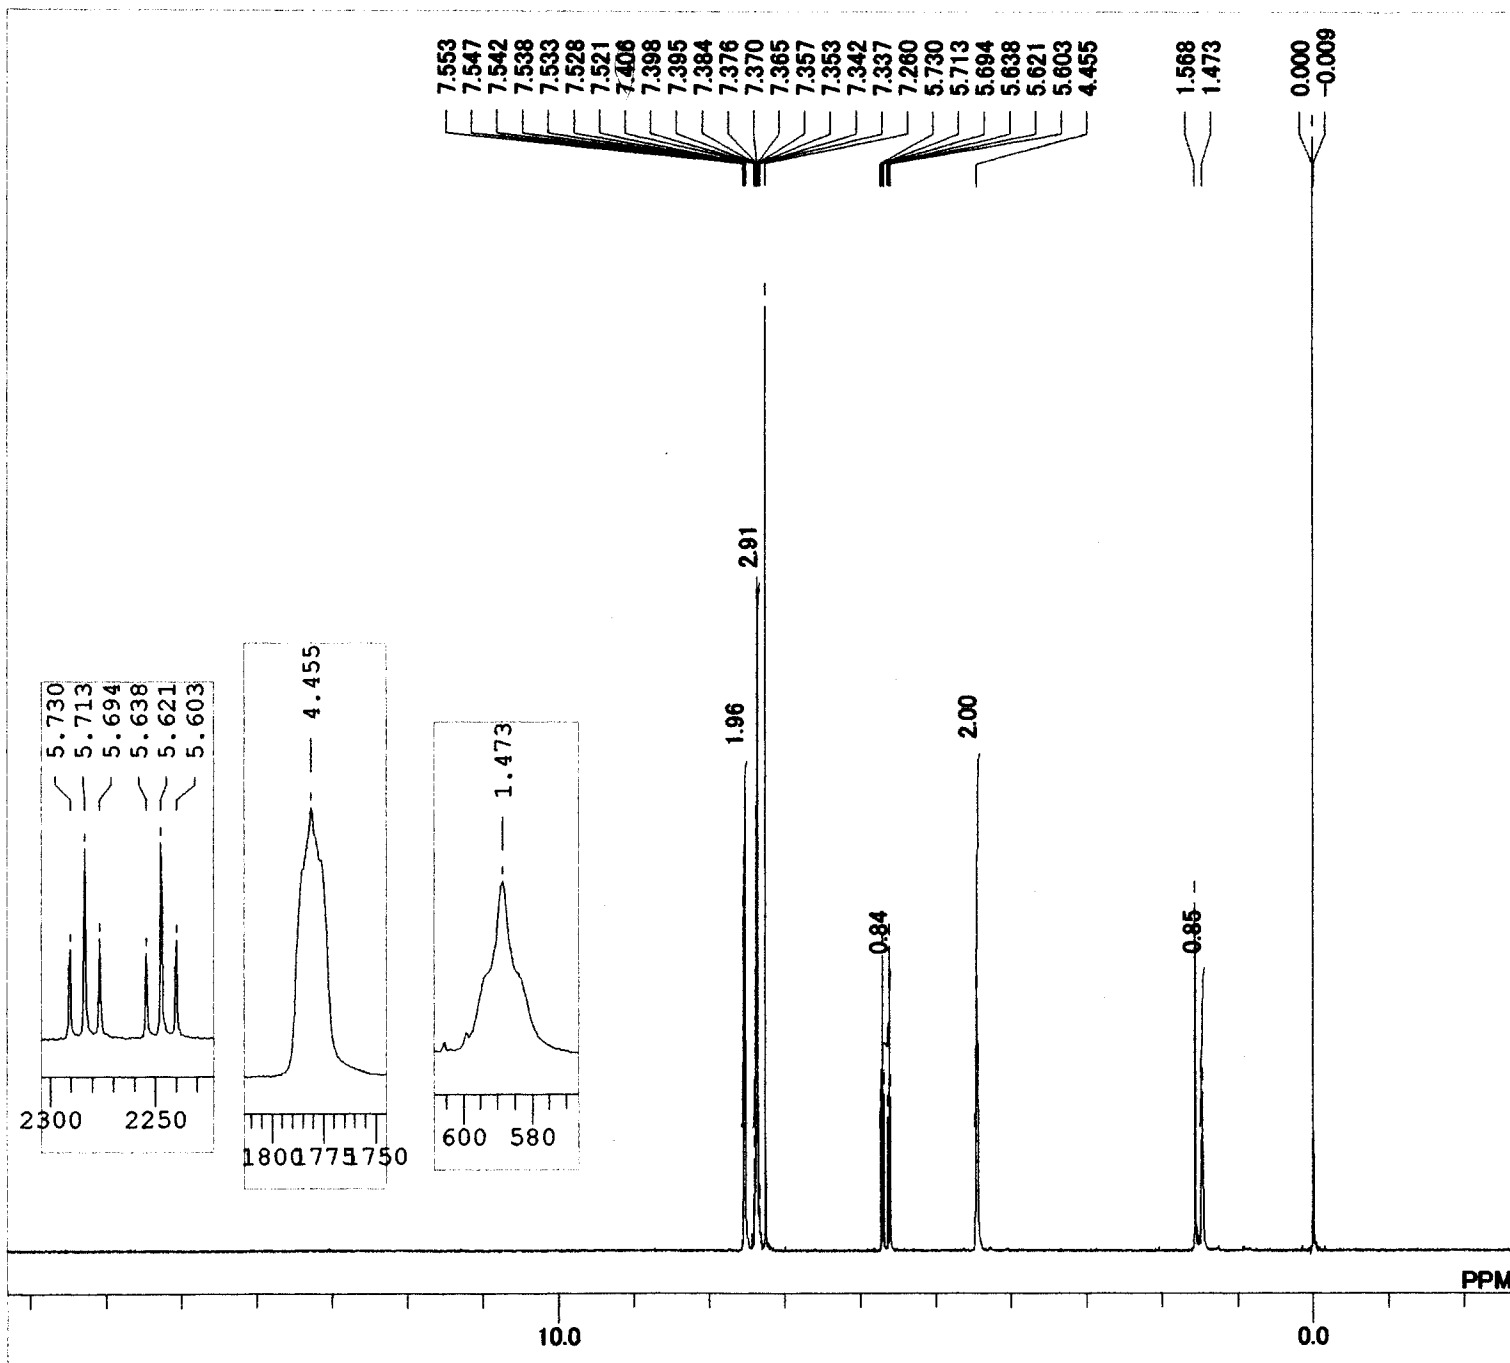

|       |                                  |
|-------|----------------------------------|
| MENUF | 1H                               |
| OBNUC | 1H                               |
| OFR   | 399.65 MHz                       |
| OBSET | 135.40 KHz                       |
| OBFIN | 24.90 Hz                         |
| PW1   | 5.50 usec                        |
| DEADT | 72.20 usec                       |
| PREDL | 0.20000 msec                     |
| IWT   | 1.0000 msec                      |
| POINT | 16384                            |
| SPO   | 16384                            |
| TIMES | 8                                |
| DUMMY | 1                                |
| FREQU | 7992.01 Hz                       |
| FLT   | 4000 Hz                          |
| DELAY | 50.00 usec                       |
| ACQTM | 2.0501 sec                       |
| PD    | 4.9500 sec                       |
| ADBIT | 16                               |
| RGAIN | 18                               |
| BF    | 0.10 Hz                          |
| T1    | 0.00                             |
| T2    | 0.00                             |
| T3    | 90.00                            |
| T4    | 100.00                           |
| EXMOD | NON                              |
| EXPCM | NON:Single.coupled:PW1_ACQTM_PD: |
| IRNUC | 1H                               |
| IFR   | 399.65 MHz                       |
| IRSET | 136.90 KHz                       |
| IRFIN | 97.50 Hz                         |
| IRRPW | 45 usec                          |
| IRATN | 511                              |
| DFILE | _DEFAULT.ALS                     |
| SF    | TH5AT                            |
| LKSET | 61.60 KHz                        |
| LKFIN | 79.0 Hz                          |
| LKLEV | 200                              |
| LGAIN | 25                               |
| LKPHS | 255                              |
| LKSIG | 3810                             |
| CSPED | 12 Hz                            |
| FILDC |                                  |
| FILDF |                                  |

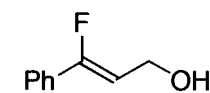

# g-F-allyl alcohol

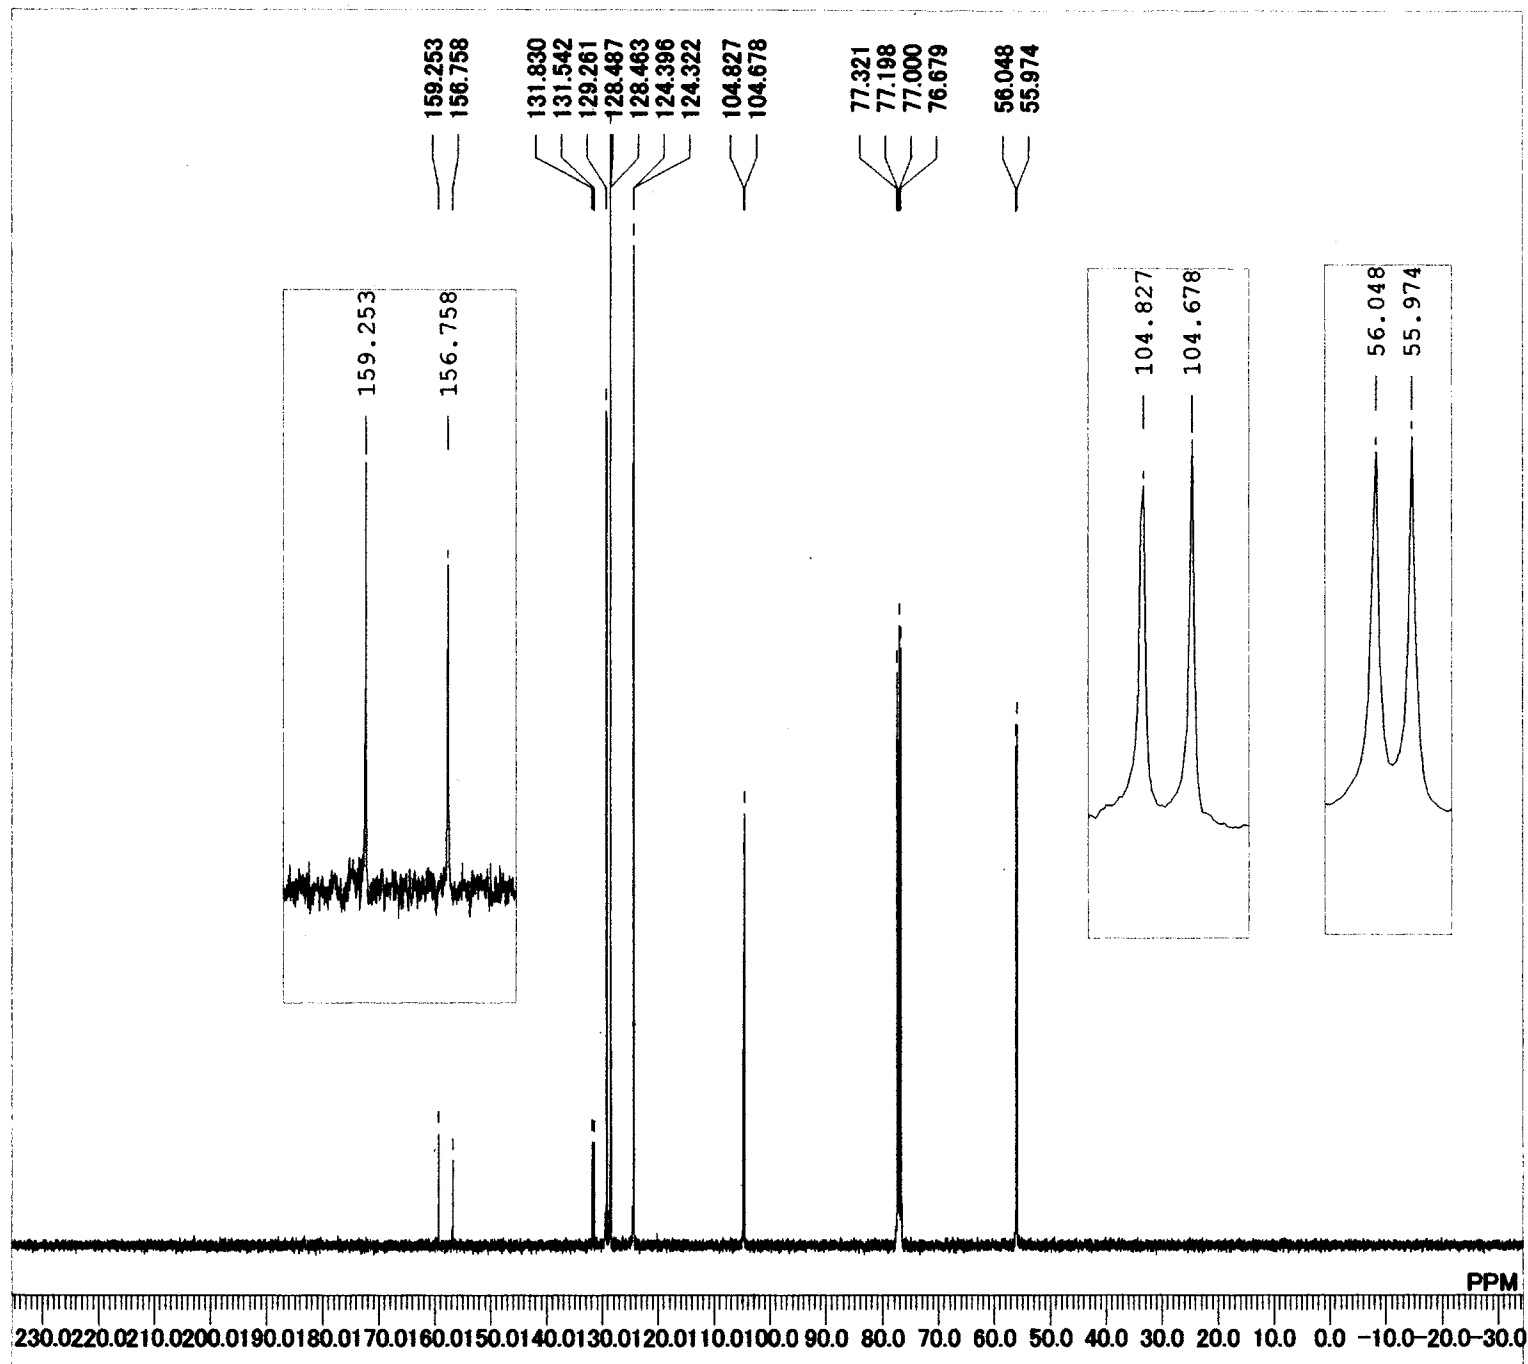

MENUF 13C  
OBNUC 13C  
OFR 100.40 MHz  
OBSET 125.00 KHz  
OBFIN 10500.00 Hz  
PW1 5.70 usec  
DEADT 19.30 usec  
PREDL 0.20000 msec  
IWT 1.0000 msec  
POINT 32768  
SPO 32768  
TIMES 10000  
DUMMY 1  
FREQU 27118.64 Hz  
FLT 13550 Hz  
DELAY 14.80 usec  
ACQTM 1.2083 sec  
PD 1.7920 sec  
ADBIT 16  
RGAIN 25  
BF 1.00 Hz  
T1 0.00  
T2 0.00  
T3 90.00  
T4 100.00  
EXMOD BCM  
EXPCM Bilevel.complete.decoupling:Set\_IRRP1  
IRNUC 1H  
IFR 399.65 MHz  
IRSET 124.00 KHz  
IRFIN 10500.00 Hz  
IRRPW 45 usec  
IRATN 511  
DFILE g-F-allyl alcohol(C).als  
SF TH5AT  
LKSET 61.60 KHz  
LKFIN 79.0 Hz  
LKLEV 200  
LGAIN 24  
LKPHS 255  
LKSIG 2055  
CSPED 12 Hz  
FILDC  
FILDF

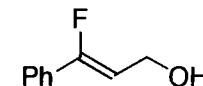

auto

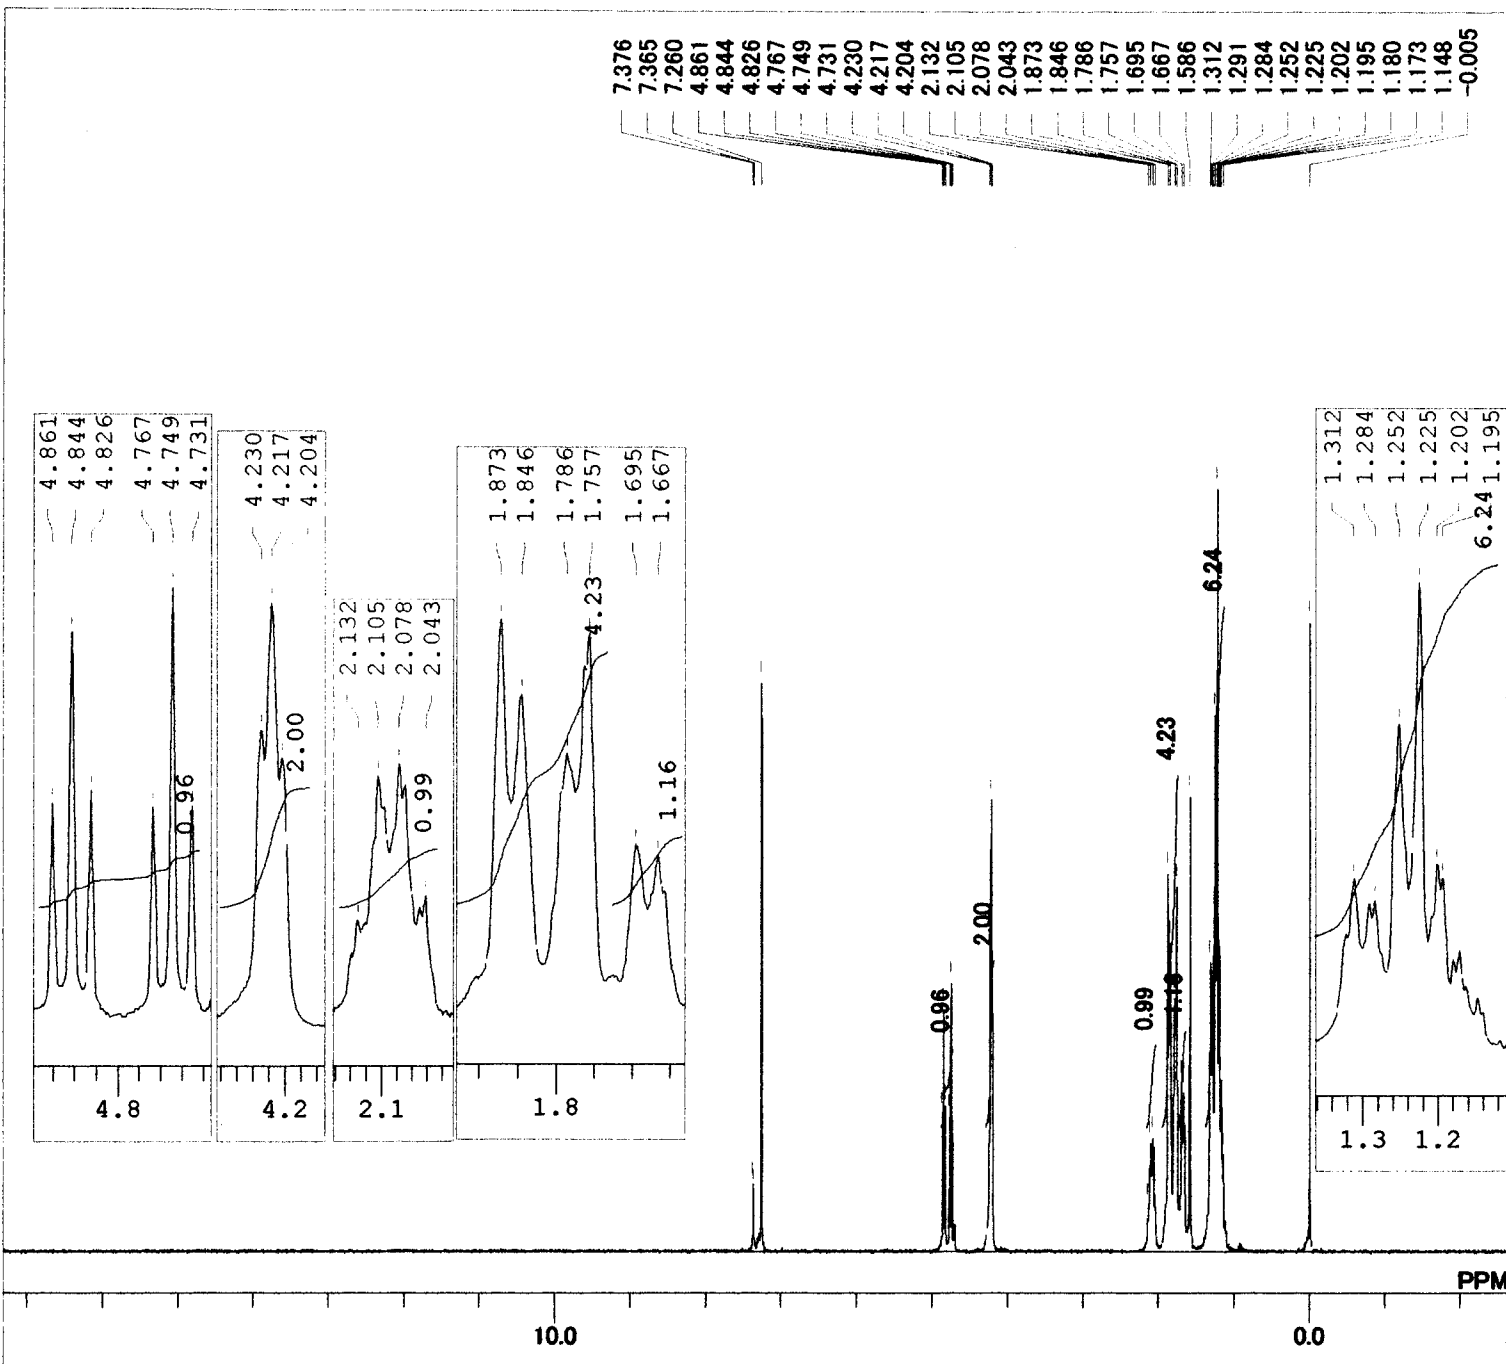

|       |                                  |
|-------|----------------------------------|
| MENUF | 1H                               |
| OBNUC | 1H                               |
| OFR   | 399.65 MHz                       |
| OBSET | 135.40 KHz                       |
| OBFIN | 24.90 Hz                         |
| PW1   | 5.20 usec                        |
| DEADT | 72.40 usec                       |
| PREDL | 0.20000 msec                     |
| IWT   | 1.0000 msec                      |
| POINT | 16384                            |
| SPO   | 16384                            |
| TIMES | 8                                |
| DUMMY | 1                                |
| FREQU | 7992.01 Hz                       |
| FLT   | 4000 Hz                          |
| DELAY | 50.00 usec                       |
| ACQTM | 2.0501 sec                       |
| PD    | 4.9500 sec                       |
| ADBIT | 16                               |
| RGAIN | 16                               |
| BF    | 0.10 Hz                          |
| T1    | 0.00                             |
| T2    | 0.00                             |
| T3    | 90.00                            |
| T4    | 100.00                           |
| EXMOD | NON                              |
| EXPCM | NON:Single.coupled:PW1_ACQTM_PD: |
| IRNUC | 1H                               |
| IFR   | 399.65 MHz                       |
| IRSET | 136.90 KHz                       |
| IRFIN | 97.50 Hz                         |
| IRRPW | 45 usec                          |
| IRATN | 511                              |
| DFILE | 08410 allyl-OH R=Cy (H).als      |
| SF    | TH5ATFG2                         |
| LKSET | 61.60 KHz                        |
| LKFIN | 79.0 Hz                          |
| LKLEV | 180                              |
| LGAIN | 24                               |
| LKPHS | 219                              |
| LKSIG | 1131                             |
| CSPED | 12 Hz                            |
| FILDC |                                  |
| FILDF |                                  |

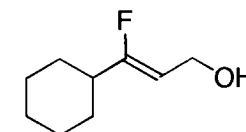

auto

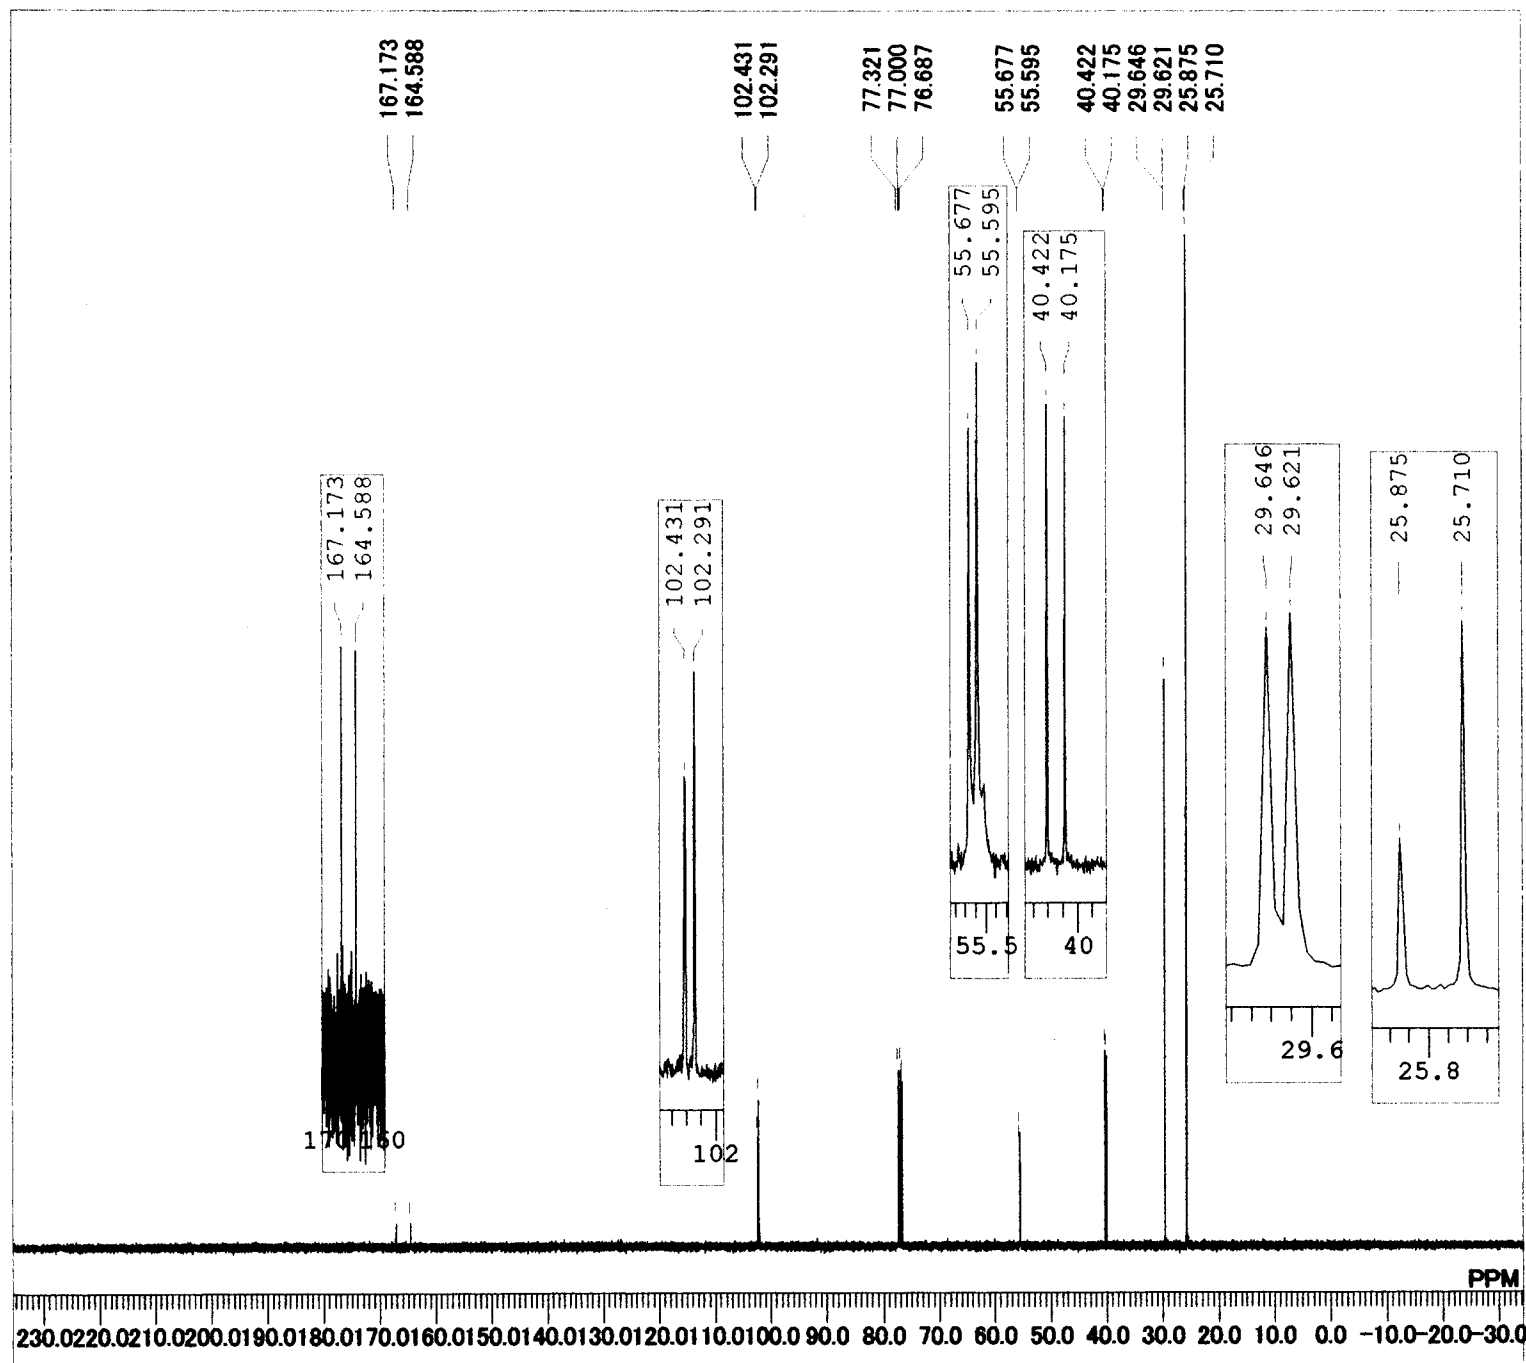

MENUF 13C  
 OBNUC 13C  
 OFR 100.40 MHz  
 OBSET 125.00 KHz  
 OBFIN 10500.00 Hz  
 PW1 6.00 usec  
 DEADT 19.10 usec  
 PREDL 0.20000 msec  
 IWT 1.0000 msec  
 POINT 32768  
 SPO 32768  
 TIMES 256  
 DUMMY 1  
 FREQU 27118.64 Hz  
 FLT 13550 Hz  
 DELAY 14.80 usec  
 ACQTM 1.2083 sec  
 PD 1.7920 sec  
 ADBIT 16  
 RGAIN 25  
 BF 0.10 Hz  
 T1 0.00  
 T2 0.00  
 T3 90.00  
 T4 100.00  
 EXMOD BCM  
 EXPCM Bilevel.complete.decoupling:Set\_IRRP1  
 IRNUC 1H  
 IFR 399.65 MHz  
 IRSET 124.00 KHz  
 IRFIN 10500.00 Hz  
 IRRPW 45 usec  
 IRATN 511  
 DFILE 08410 allyl-OH R=Cy (C).als  
 SF TH5ATFG2  
 LKSET 61.60 KHz  
 LKFIN 79.0 Hz  
 LKLEV 180  
 LGAIN 23  
 LKPHS 219  
 LKSIG 1013  
 CSPED 14 Hz  
 FILDC  
 FILDF

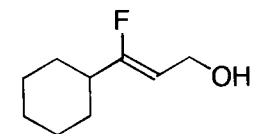

auto

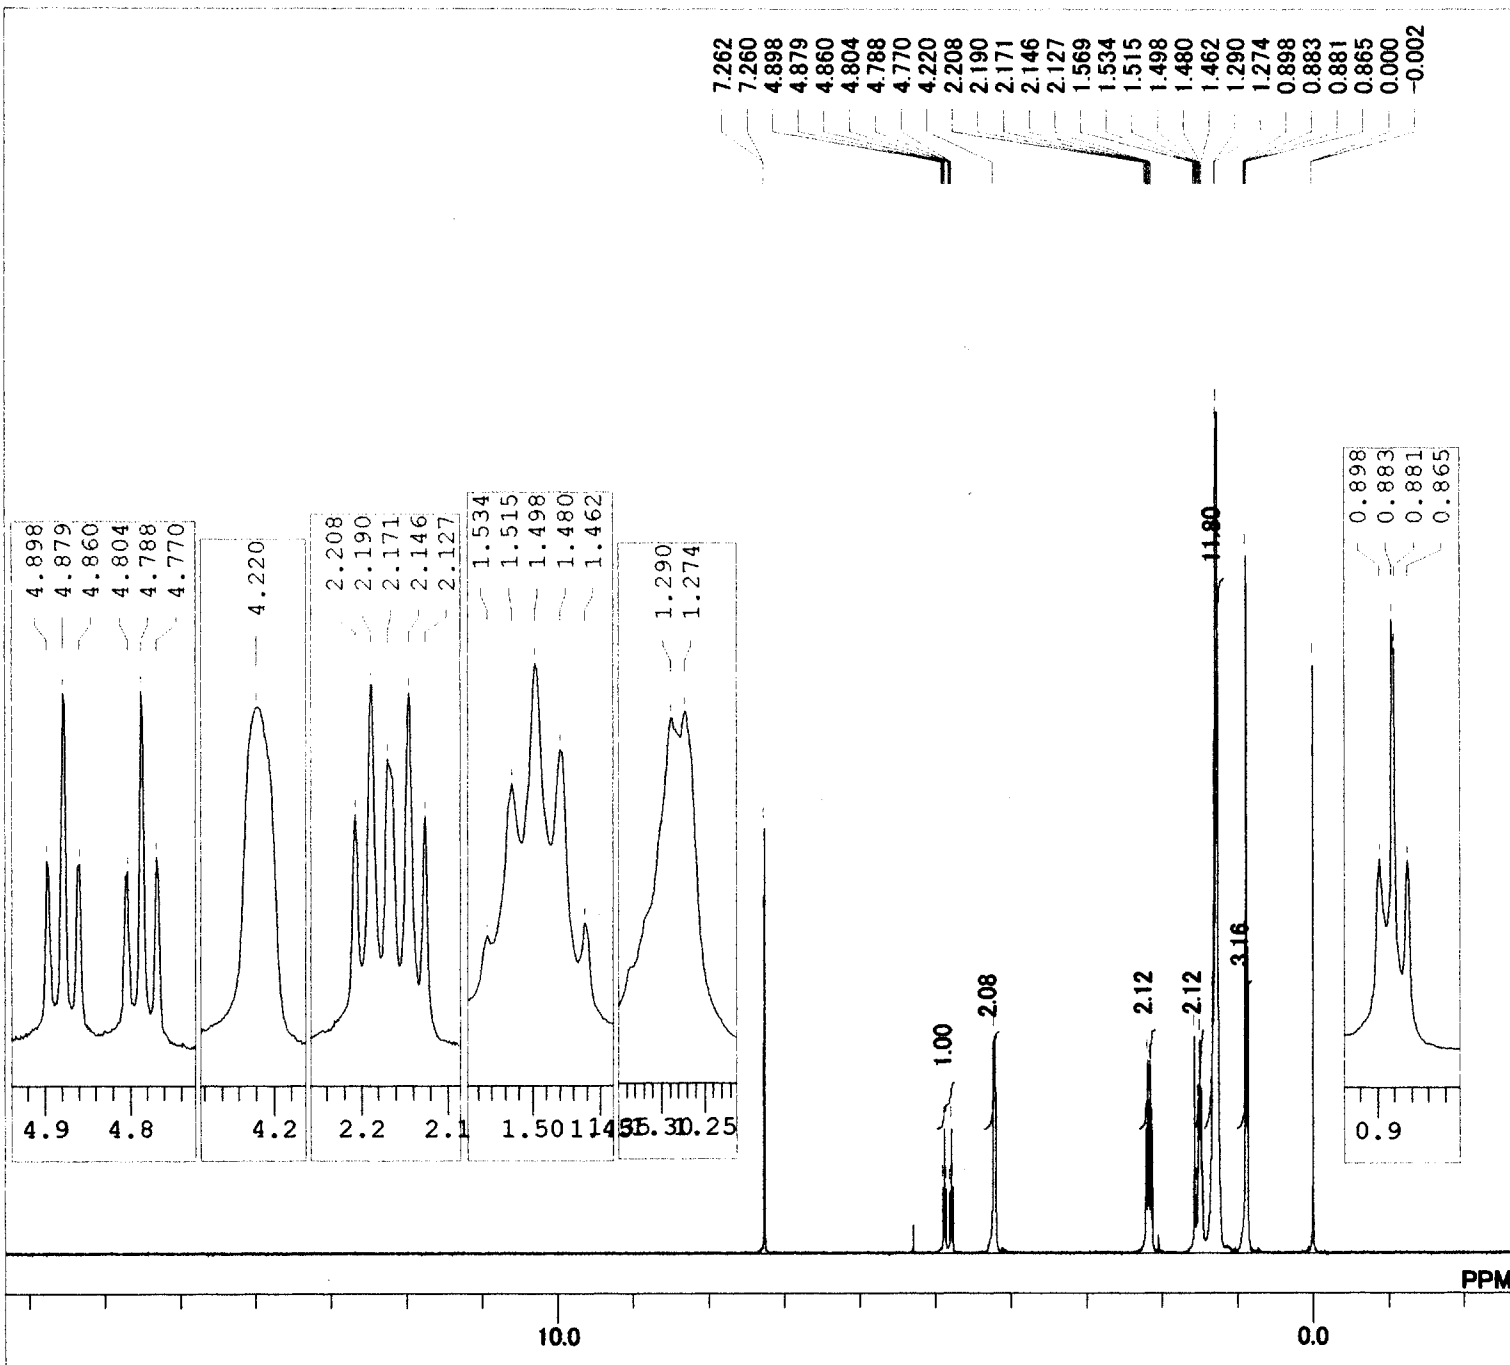

|       |                                  |
|-------|----------------------------------|
| MENUF | 1H                               |
| OBNUC | 1H                               |
| OFR   | 399.65 MHz                       |
| OBSET | 135.40 KHz                       |
| OBFIN | 24.90 Hz                         |
| PW1   | 5.20 usec                        |
| DEADT | 72.40 usec                       |
| PREDL | 0.20000 msec                     |
| IWT   | 1.0000 msec                      |
| POINT | 16384                            |
| SPO   | 16384                            |
| TIMES | 8                                |
| DUMMY | 1                                |
| FREQU | 7992.01 Hz                       |
| FLT   | 4000 Hz                          |
| DELAY | 50.00 usec                       |
| ACQTM | 2.0501 sec                       |
| PD    | 4.9500 sec                       |
| ADBIT | 16                               |
| RGAIN | 17                               |
| BF    | 0.10 Hz                          |
| T1    | 0.00                             |
| T2    | 0.00                             |
| T3    | 90.00                            |
| T4    | 100.00                           |
| EXMOD | NON                              |
| EXPCM | NON:Single.coupled:PW1_ACQTM_PD: |
| IRNUC | 1H                               |
| IFR   | 399.65 MHz                       |
| IRSET | 136.90 KHz                       |
| IRFIN | 97.50 Hz                         |
| IRRPW | 45 usec                          |
| IRATN | 511                              |
| DFILE | 08310 allyl-OH R=Oc (H).als      |
| SF    | TH5ATFG2                         |
| LKSET | 61.60 KHz                        |
| LKFIN | 79.0 Hz                          |
| LKLEV | 180                              |
| LGAIN | 24                               |
| LKPHS | 219                              |
| LKSIG | 888                              |
| CSPED | 11 Hz                            |
| FILDC |                                  |
| FILDF |                                  |

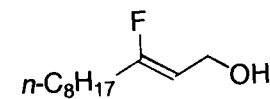

auto

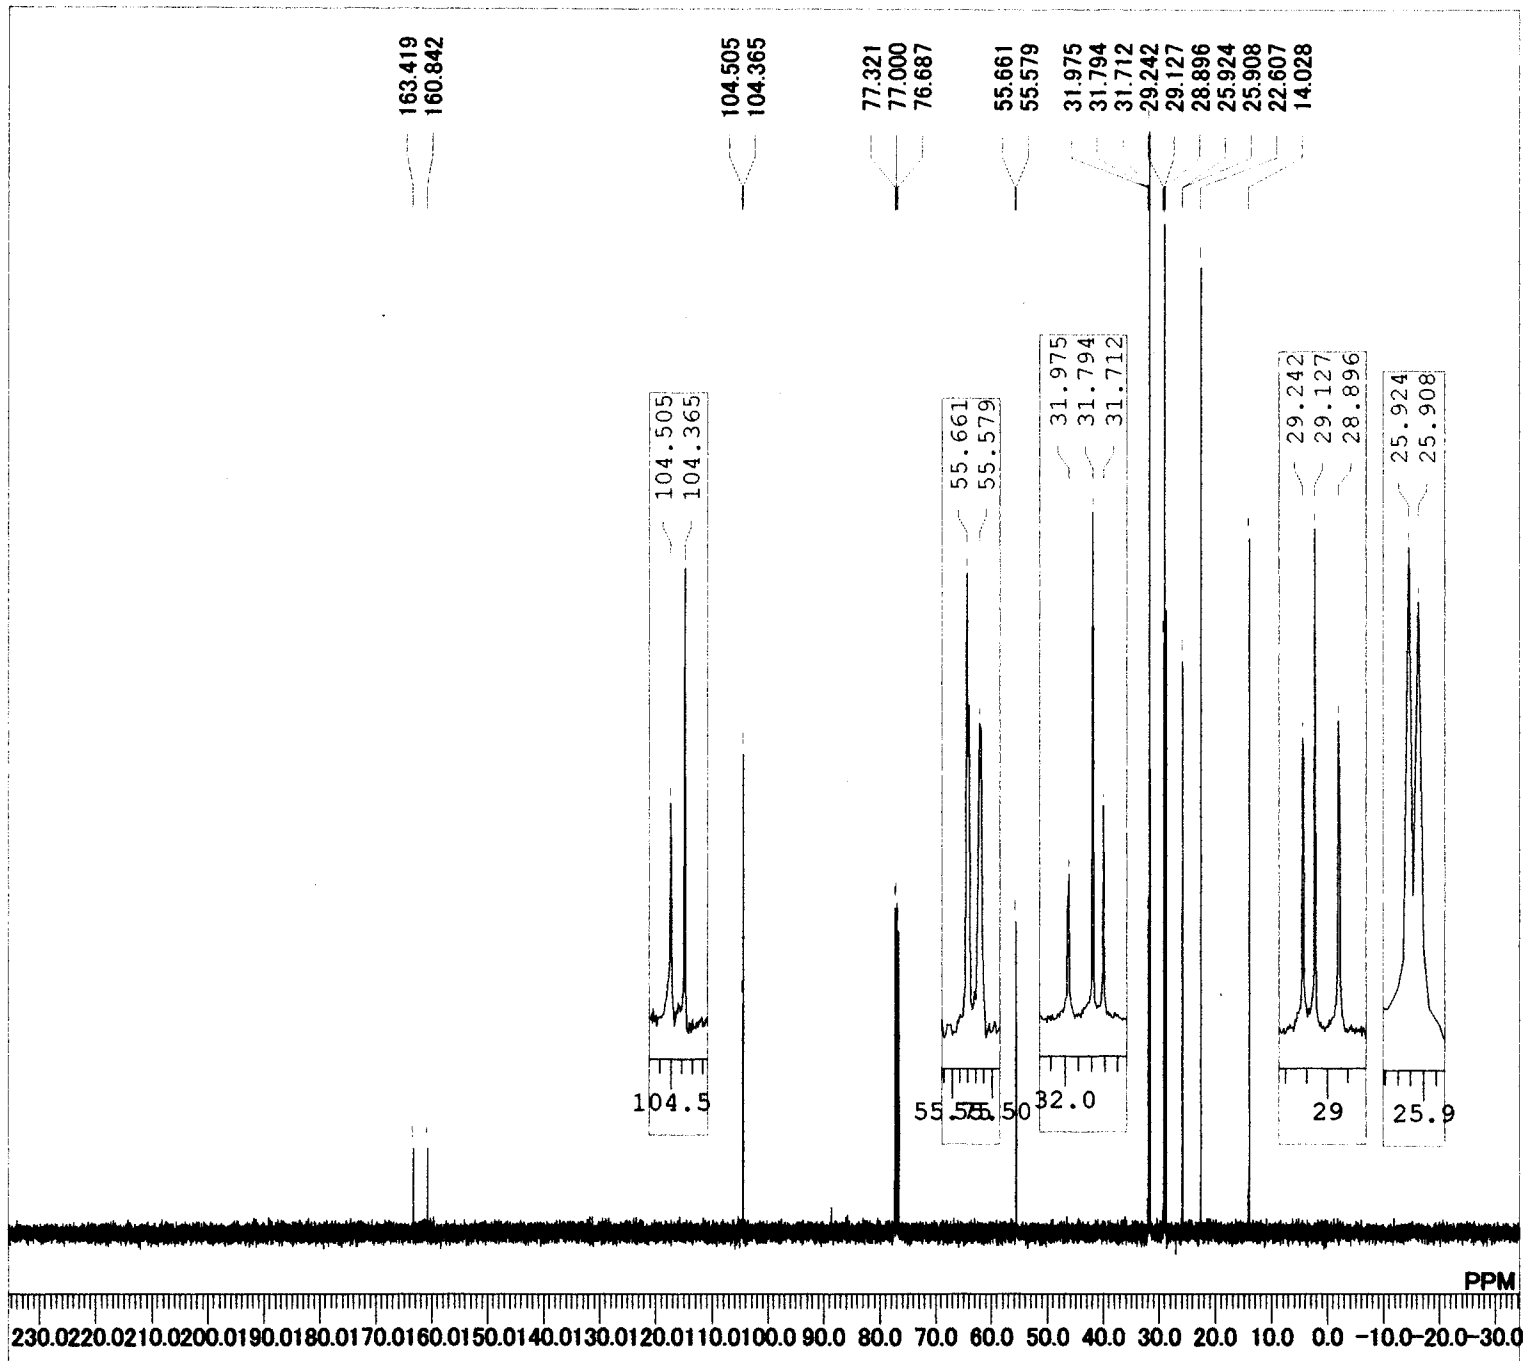

|       |                                       |
|-------|---------------------------------------|
| MENUF | 13C                                   |
| OBNUC | 13C                                   |
| OFR   | 100.40 MHz                            |
| OBSET | 125.00 KHz                            |
| OBFIN | 10500.00 Hz                           |
| PW1   | 6.00 usec                             |
| DEADT | 19.10 usec                            |
| PREDL | 0.20000 msec                          |
| IWT   | 1.0000 msec                           |
| POINT | 32768                                 |
| SPO   | 32768                                 |
| TIMES | 256                                   |
| DUMMY | 1                                     |
| FREQU | 27118.64 Hz                           |
| FLT   | 13550 Hz                              |
| DELAY | 14.80 usec                            |
| ACQTM | 1.2083 sec                            |
| PD    | 1.7920 sec                            |
| ADBIT | 16                                    |
| RGAIN | 25                                    |
| BF    | 0.10 Hz                               |
| T1    | 0.00                                  |
| T2    | 0.00                                  |
| T3    | 90.00                                 |
| T4    | 100.00                                |
| EXMOD | BCM                                   |
| EXPCM | Bilevel.complete.decoupling:Set_IRRP1 |
| IRNUC | 1H                                    |
| IFR   | 399.65 MHz                            |
| IRSET | 124.00 KHz                            |
| IRFIN | 10500.00 Hz                           |
| IRRPW | 45 usec                               |
| IRATN | 511                                   |
| DFILE | 08311 allyl-OH R=Oc (C) 2回目.als       |
| SF    | TH5ATFG2                              |
| LKSET | 61.60 KHz                             |
| LKFIN | 79.0 Hz                               |
| LKLEV | 180                                   |
| LGAIN | 23                                    |
| LKPHS | 219                                   |
| LKSIG | 514                                   |
| CSPED | 12 Hz                                 |
| FILDC |                                       |
| FILDF |                                       |

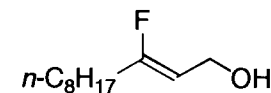

auto

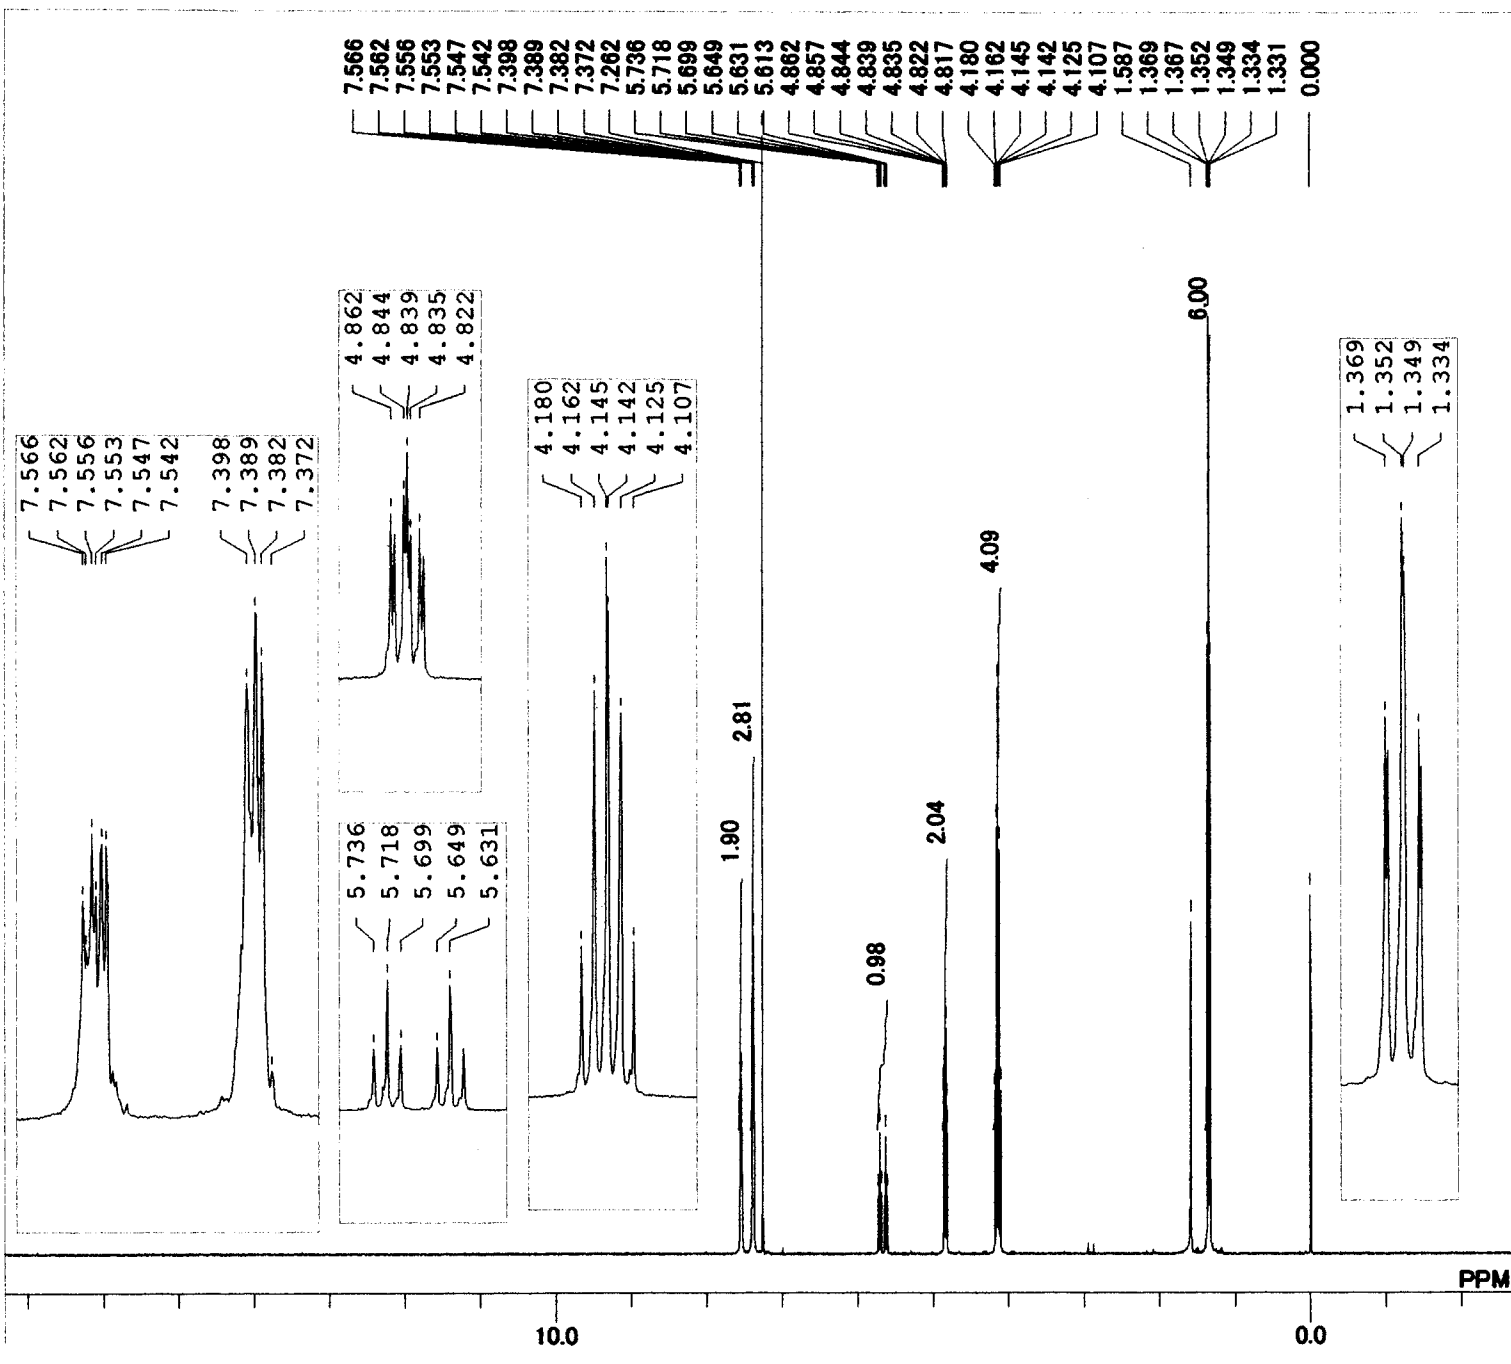

|       |                                  |
|-------|----------------------------------|
| MENUF | 1H                               |
| OBNUC | 1H                               |
| OFR   | 399.65 MHz                       |
| OBSET | 135.40 KHz                       |
| OBFIN | 24.90 Hz                         |
| PW1   | 5.50 usec                        |
| DEADT | 72.20 usec                       |
| PREDL | 0.20000 msec                     |
| IWT   | 1.0000 msec                      |
| POINT | 16384                            |
| SPO   | 16384                            |
| TIMES | 8                                |
| DUMMY | 1                                |
| FREQU | 7992.01 Hz                       |
| FLT   | 4000 Hz                          |
| DELAY | 50.00 usec                       |
| ACQTM | 2.0501 sec                       |
| PD    | 4.9500 sec                       |
| ADBIT | 16                               |
| RGAIN | 18                               |
| BF    | 0.10 Hz                          |
| T1    | 0.00                             |
| T2    | 0.00                             |
| T3    | 90.00                            |
| T4    | 100.00                           |
| EXMOD | NON                              |
| EXPCM | NON:Single.coupled:PW1_ACQTM_PD: |
| IRNUC | 1H                               |
| IFR   | 399.65 MHz                       |
| IRSET | 136.90 KHz                       |
| IRFIN | 97.50 Hz                         |
| IRRPW | 45 usec                          |
| IRATN | 511                              |
| DFILE | _DEFAULT.ALS                     |
| SF    | TH5AT                            |
| LKSET | 61.60 KHz                        |
| LKFIN | 79.0 Hz                          |
| LKLEV | 200                              |
| LGAIN | 20                               |
| LKPHS | 255                              |
| LKSIG | 1029                             |
| CSPED | 13 Hz                            |
| FILDC |                                  |
| FILDF |                                  |

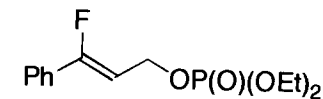



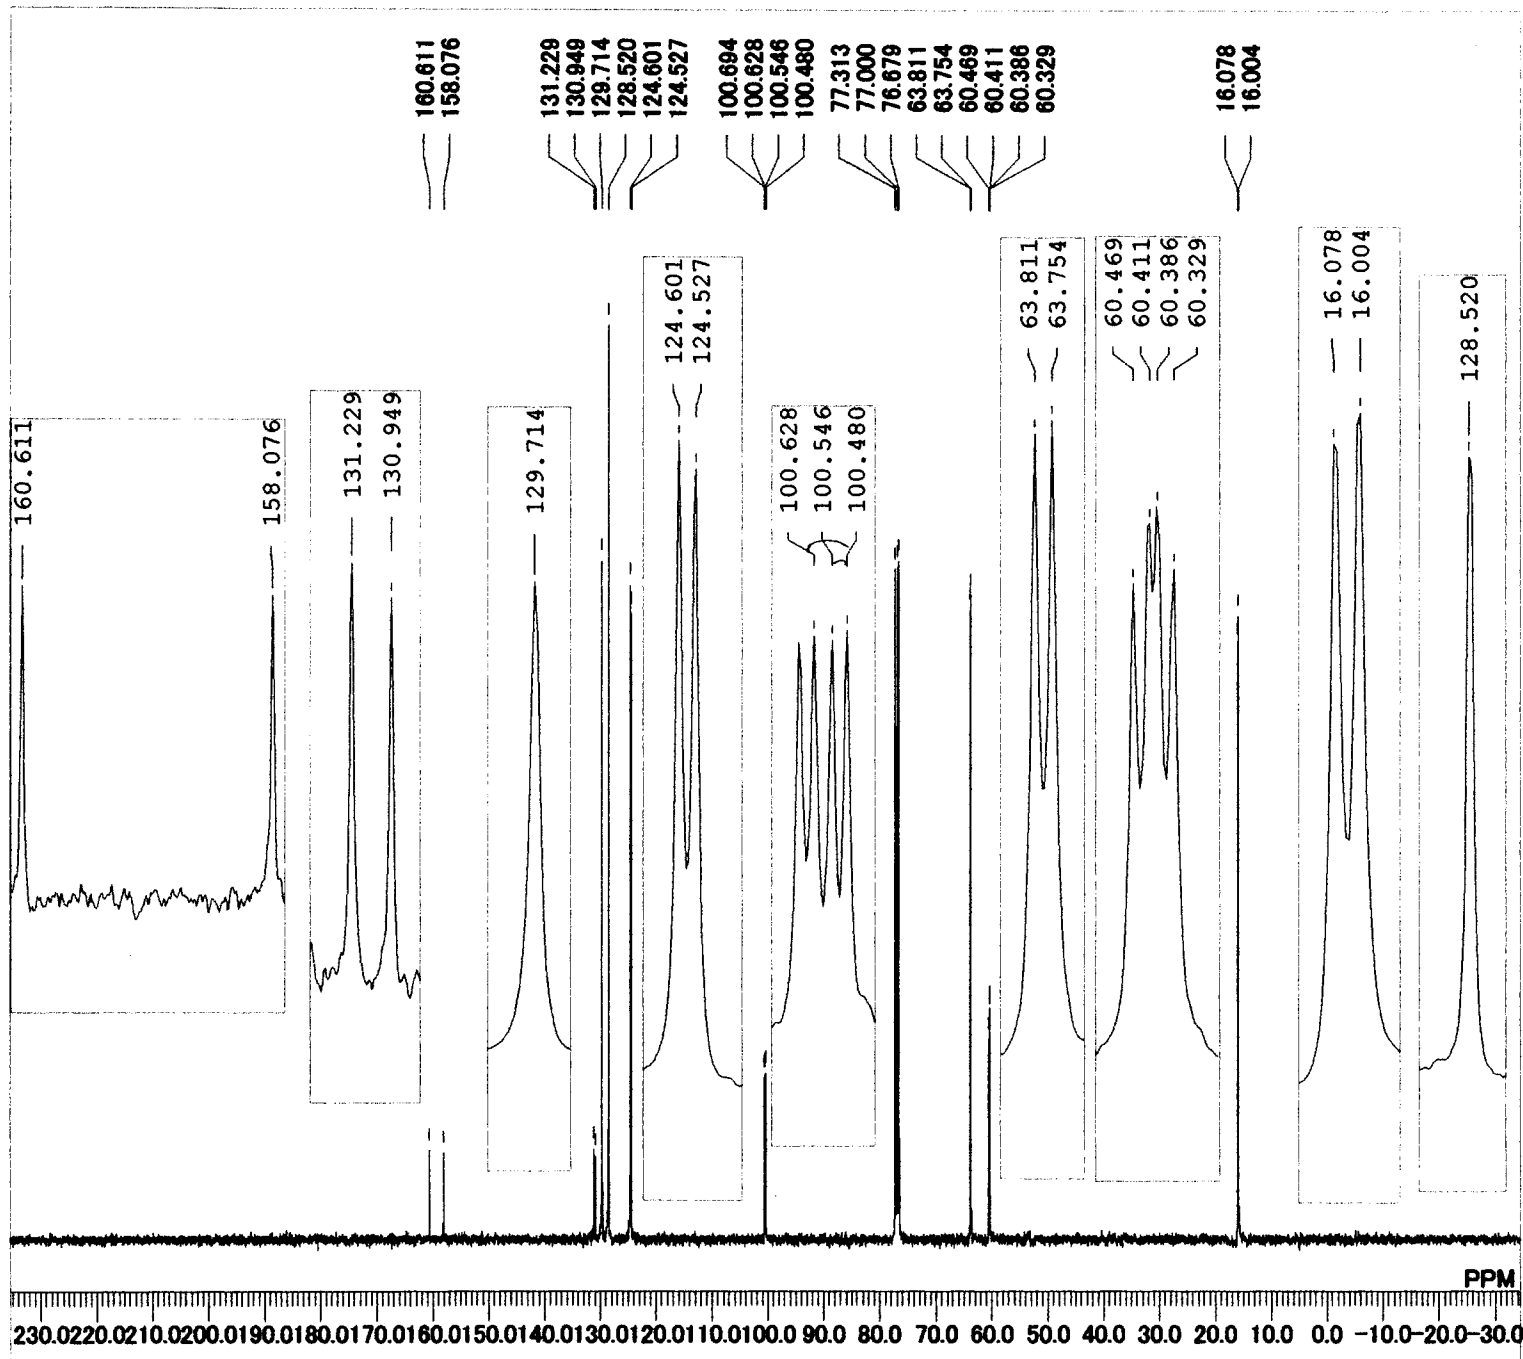

|       |                                       |
|-------|---------------------------------------|
| MENUF | 13C                                   |
| OBNUC | 13C                                   |
| OFR   | 100.40 MHz                            |
| OBSET | 125.00 KHz                            |
| OBFIN | 10500.00 Hz                           |
| PW1   | 5.70 usec                             |
| DEADT | 19.30 usec                            |
| PREDL | 0.20000 msec                          |
| IWT   | 1.0000 msec                           |
| POINT | 32768                                 |
| SPO   | 32768                                 |
| TIMES | 10000                                 |
| DUMMY | 1                                     |
| FREQU | 27118.64 Hz                           |
| FLT   | 13550 Hz                              |
| DELAY | 14.80 usec                            |
| ACQTM | 1.2083 sec                            |
| PD    | 1.7920 sec                            |
| ADBIT | 16                                    |
| RGAIN | 24                                    |
| BF    | 2.90 Hz                               |
| T1    | 0.00                                  |
| T2    | 0.00                                  |
| T3    | 90.00                                 |
| T4    | 100.00                                |
| EXMOD | BCM                                   |
| EXPCM | Bilevel.complete.decoupling.Set_IRRP1 |
| IRNUC | 1H                                    |
| IFR   | 399.65 MHz                            |
| IRSET | 124.00 KHz                            |
| IRFIN | 10500.00 Hz                           |
| IRRPW | 45 usec                               |
| IRATN | 511                                   |
| DFILE | _DEFAULT.ALS                          |
| SF    | TH5AT                                 |
| LKSET | 61.60 KHz                             |
| LKFIN | 79.0 Hz                               |
| LKLEV | 200                                   |
| LGAIN | 19                                    |
| LKPHS | 255                                   |
| LKSIG | 723                                   |
| CSPED | 10 Hz                                 |
| FILDC |                                       |
| FILDF |                                       |

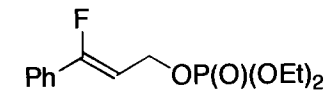

auto

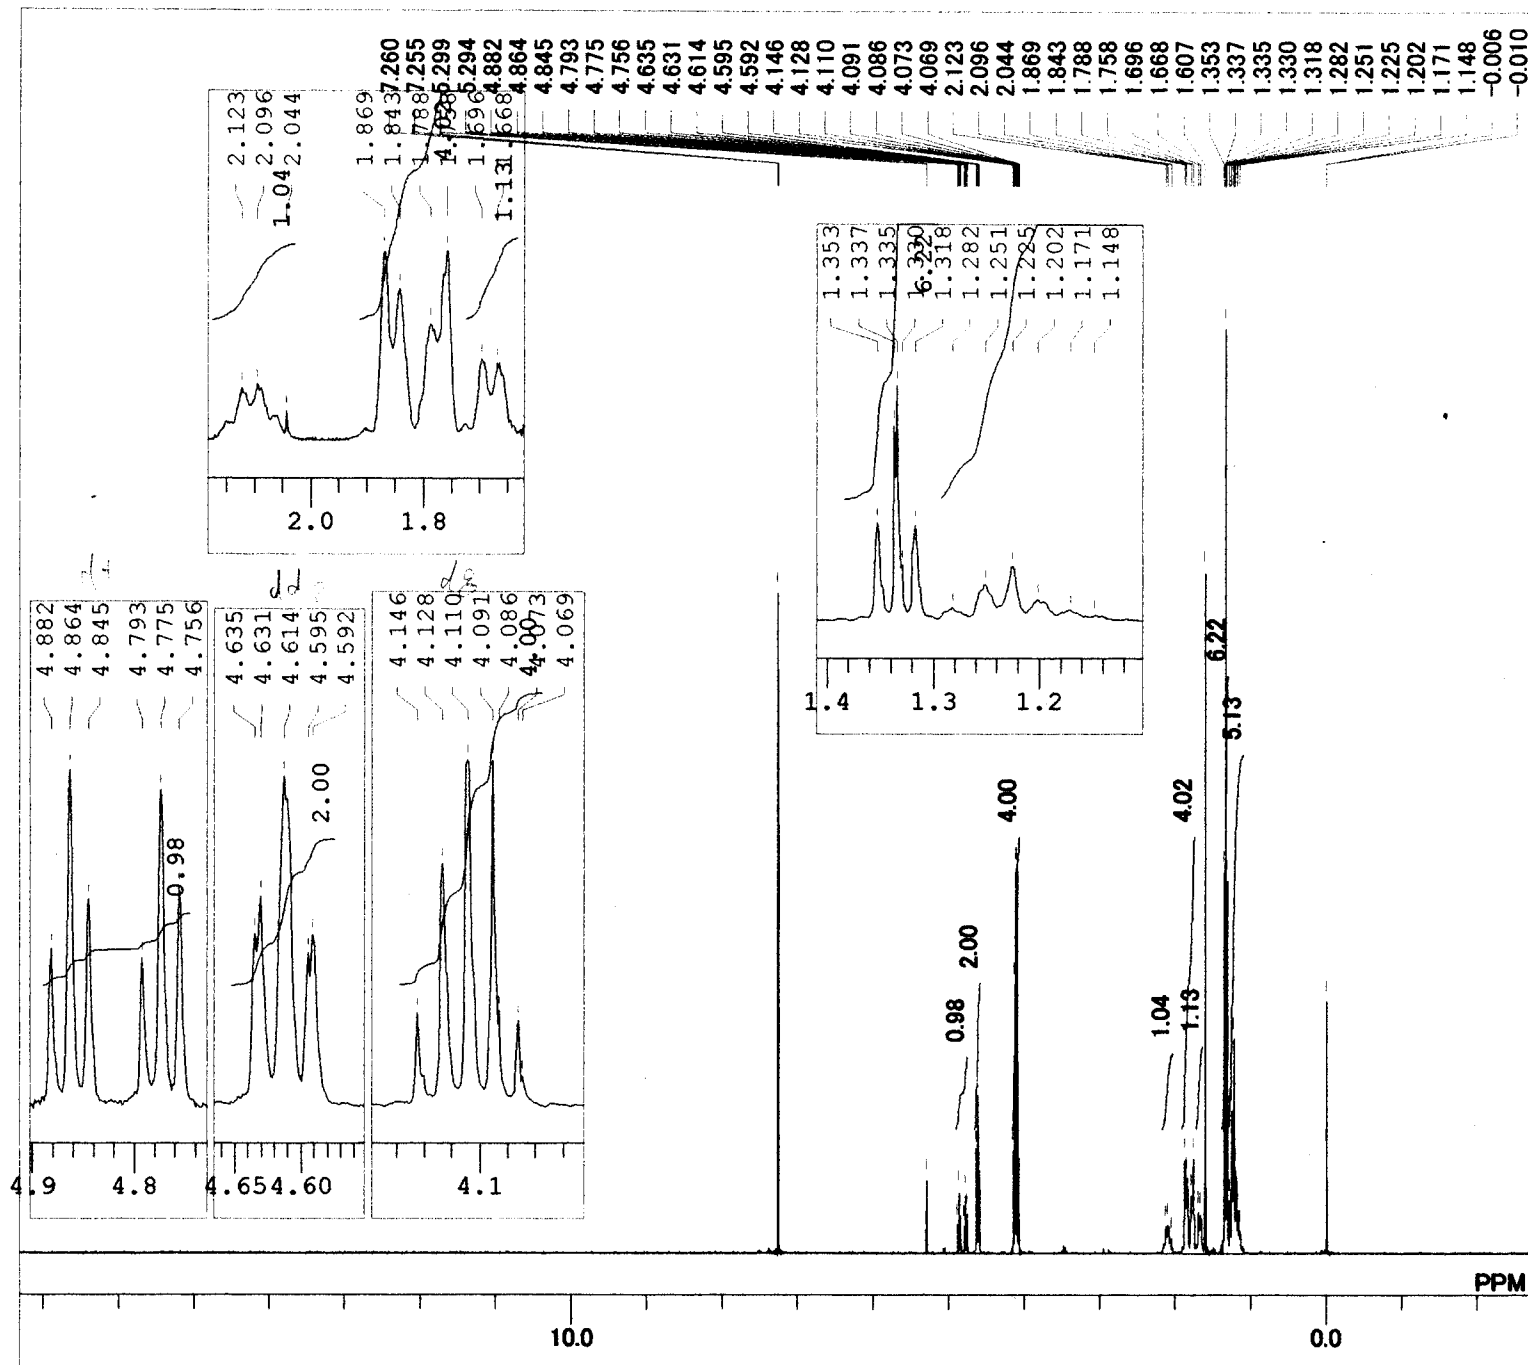

|       |                                  |
|-------|----------------------------------|
| MENUF | 1H                               |
| OBNUC | 1H                               |
| OFR   | 399.65 MHz                       |
| OBSET | 135.40 KHz                       |
| OBFIN | 24.90 Hz                         |
| PW1   | 5.20 usec                        |
| DEADT | 72.40 usec                       |
| PREDL | 0.20000 msec                     |
| IWT   | 1.0000 msec                      |
| POINT | 16384                            |
| SPO   | 16384                            |
| TIMES | 8                                |
| DUMMY | 1                                |
| FREQU | 7992.01 Hz                       |
| FLT   | 4000 Hz                          |
| DELAY | 50.00 usec                       |
| ACQTM | 2.0501 sec                       |
| PD    | 4.9500 sec                       |
| ADBIT | 16                               |
| RGAIN | 17                               |
| BF    | 0.10 Hz                          |
| T1    | 0.00                             |
| T2    | 0.00                             |
| T3    | 90.00                            |
| T4    | 100.00                           |
| EXMOD | NON                              |
| EXPCM | NON:Single.coupled:PW1_ACQTM_PD: |
| IRNUC | 1H                               |
| IFR   | 399.65 MHz                       |
| IRSET | 136.90 KHz                       |
| IRFIN | 97.50 Hz                         |
| IRRPW | 45 usec                          |
| IRATN | 511                              |
| DFILE | 08415 allyl-OP R=Cy (H).als      |
| SF    | TH5ATFG2                         |
| LKSET | 61.60 KHz                        |
| LKFIN | 79.0 Hz                          |
| LKLEV | 180                              |
| LGAIN | 25                               |
| LKPHS | 219                              |
| LKSIG | 1948                             |
| CSPED | 13 Hz                            |
| FILDC |                                  |
| FILDF |                                  |

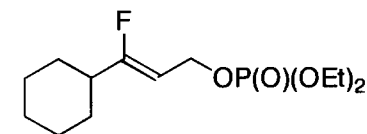

auto

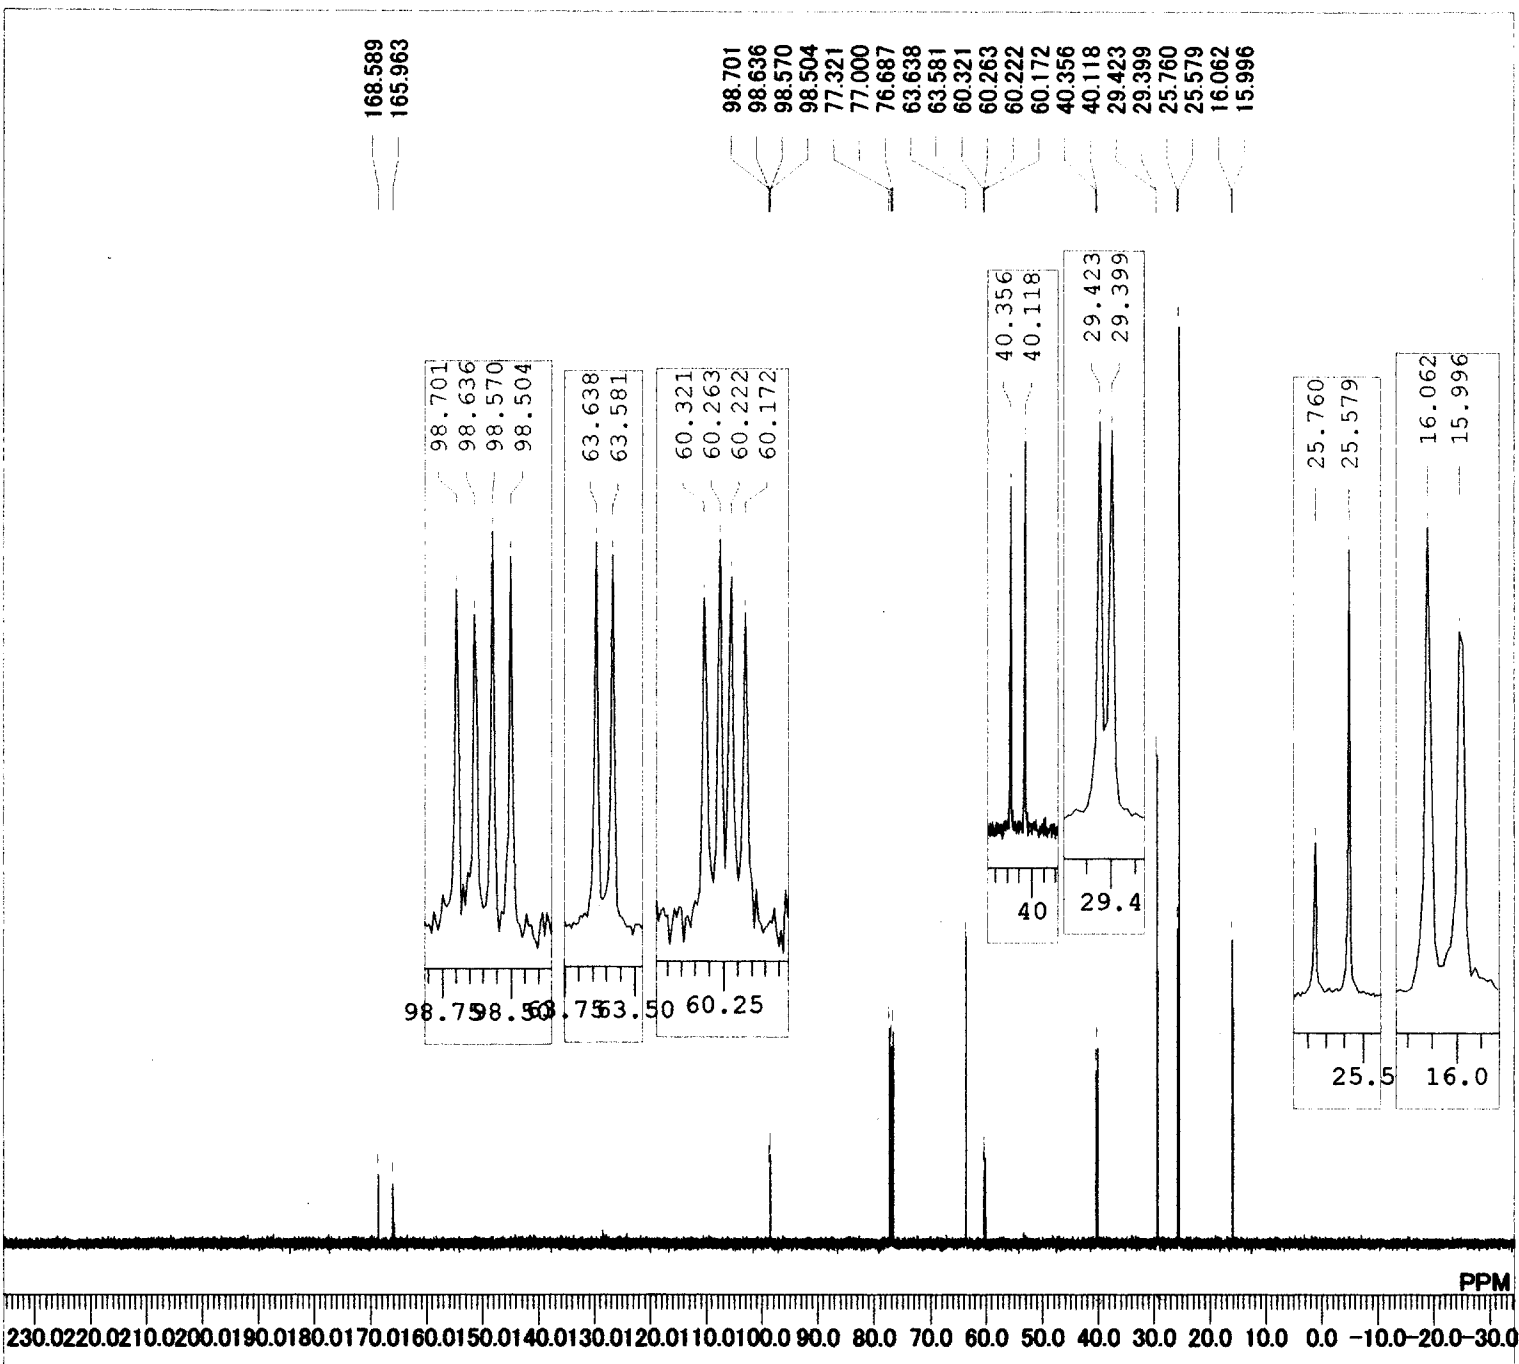

|       |                                       |
|-------|---------------------------------------|
| MENUF | 13C                                   |
| OBNUC | 13C                                   |
| OFR   | 100.40 MHz                            |
| OBSET | 125.00 KHz                            |
| OBFIN | 10500.00 Hz                           |
| PW1   | 6.00 usec                             |
| DEADT | 19.10 usec                            |
| PREDL | 0.20000 msec                          |
| IWT   | 1.0000 msec                           |
| POINT | 32768                                 |
| SPO   | 32768                                 |
| TIMES | 256                                   |
| DUMMY | 1                                     |
| FREQU | 27118.64 Hz                           |
| FLT   | 13550 Hz                              |
| DELAY | 14.80 usec                            |
| ACQTM | 1.2083 sec                            |
| PD    | 1.7920 sec                            |
| ADBIT | 16                                    |
| RGAIN | 25                                    |
| BF    | 0.10 Hz                               |
| T1    | 0.00                                  |
| T2    | 0.00                                  |
| T3    | 90.00                                 |
| T4    | 100.00                                |
| EXMOD | BCM                                   |
| EXPCM | Bilevel.complete.decoupling:Set_IRRP1 |
| IRNUC | 1H                                    |
| IFR   | 399.65 MHz                            |
| IRSET | 124.00 KHz                            |
| IRFIN | 10500.00 Hz                           |
| IRRPW | 45 usec                               |
| IRATN | 511                                   |
| DFILE | 08415 allyl-OP R=Cy (C).als           |
| SF    | TH5ATFG2                              |
| LKSET | 61.60 KHz                             |
| LKFIN | 79.0 Hz                               |
| LKLEV | 180                                   |
| LGAIN | 25                                    |
| LKPHS | 219                                   |
| LKSIG | 1252                                  |
| CSPED | 10 Hz                                 |
| FILDC |                                       |
| FILDF |                                       |

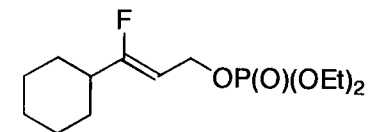

auto

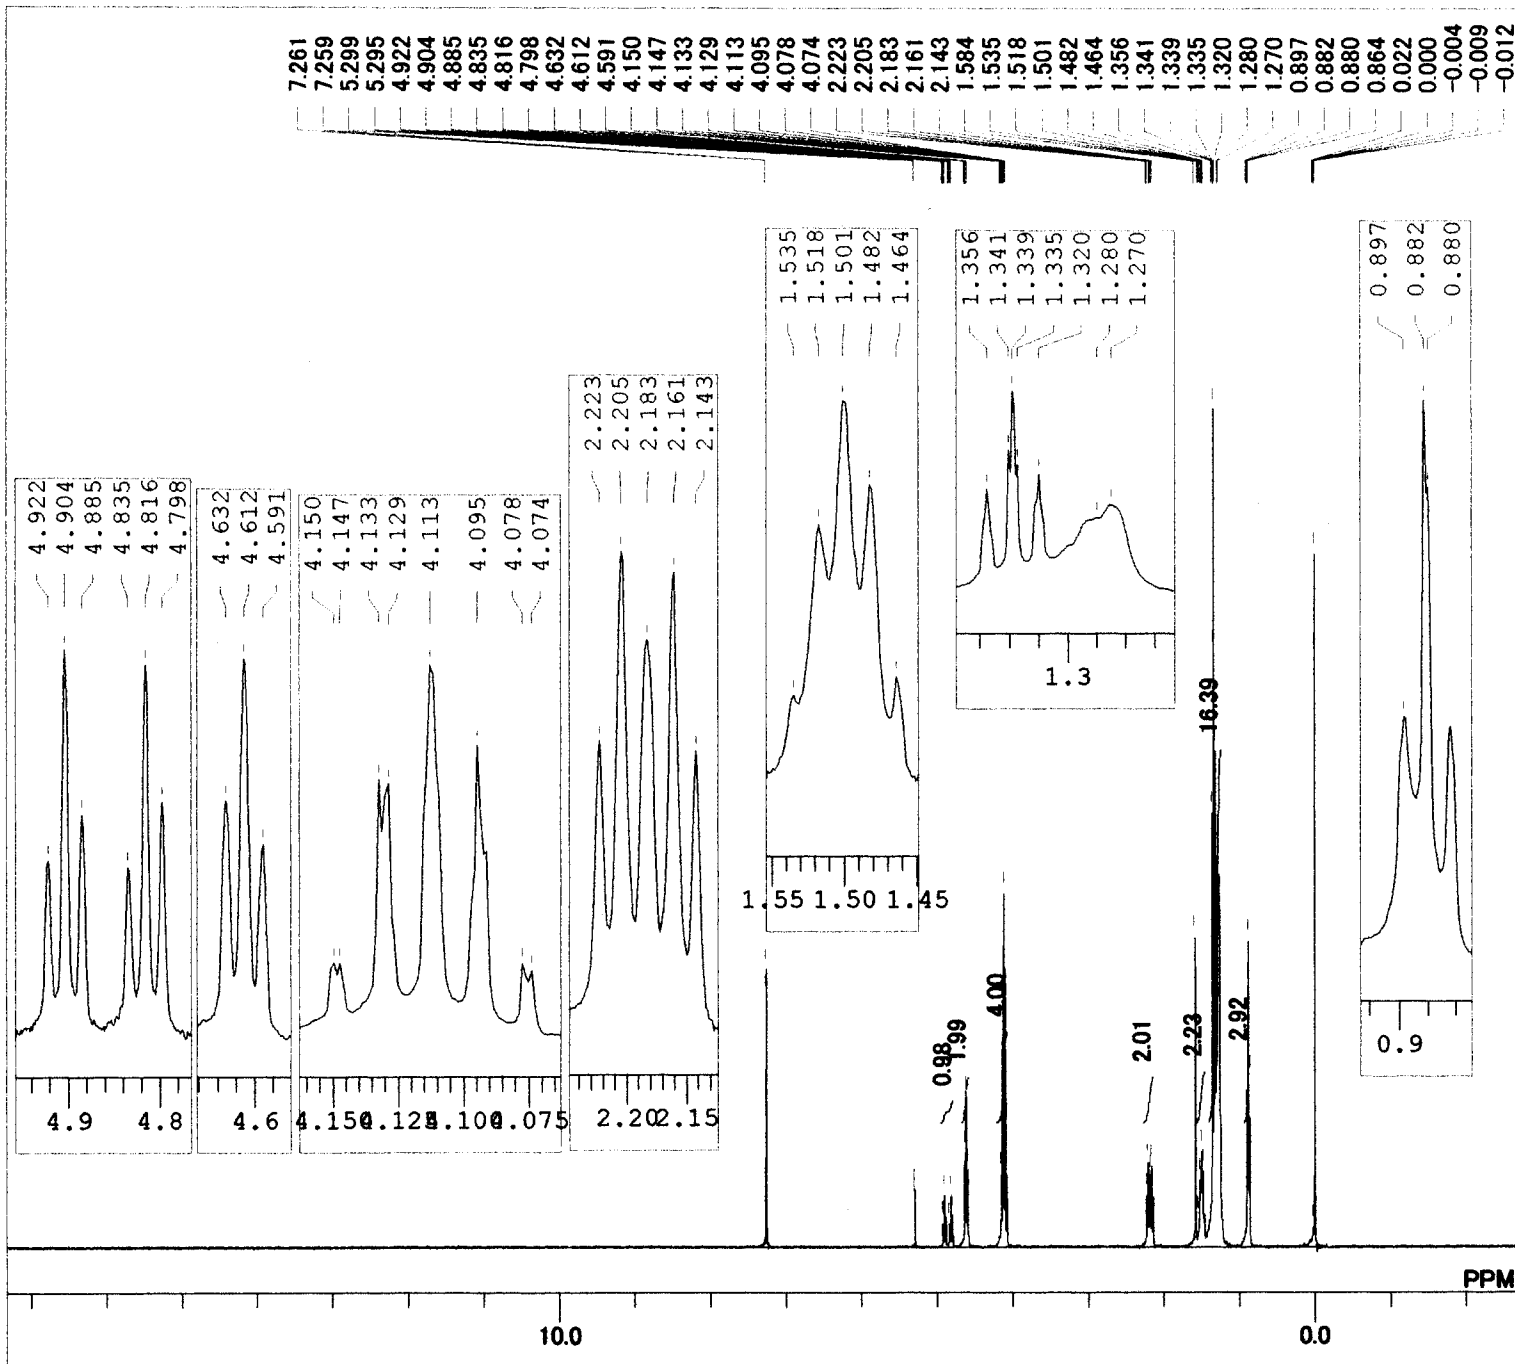

MENUF 1H  
 OBNUC 1H  
 OFR 399.65 MHz  
 OBSET 135.40 KHz  
 OBFIN 24.90 Hz  
 PW1 5.20 usec  
 DEADT 72.40 usec  
 PREDL 0.20000 msec  
 IWT 1.0000 msec  
 POINT 16384  
 SPO 16384  
 TIMES 8  
 DUMMY 1  
 FREQU 7992.01 Hz  
 FLT 4000 Hz  
 DELAY 50.00 usec  
 ACQTM 2.0501 sec  
 PD 4.9500 sec  
 ADBIT 16  
 RGAIN 19  
 BF 0.10 Hz  
 T1 0.00  
 T2 0.00  
 T3 90.00  
 T4 100.00  
 EXMOD NON  
 EXPCM NON:Single.coupled:PW1\_ACQTM\_PD:  
 IRNUC 1H  
 IFR 399.65 MHz  
 IRSET 136.90 KHz  
 IRFIN 97.50 Hz  
 IRRPW 45 usec  
 IRATN 511  
 DFILE \_DEFAULT.ALS  
 SF TH5ATFG2  
 LKSET 61.60 KHz  
 LKFIN 79.0 Hz  
 LKLEV 180  
 LGAIN 26  
 LKPHS 219  
 LKSIG 1332  
 CSPED 12 Hz  
 FILDC  
 FILDF

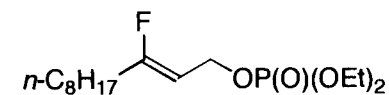

auto

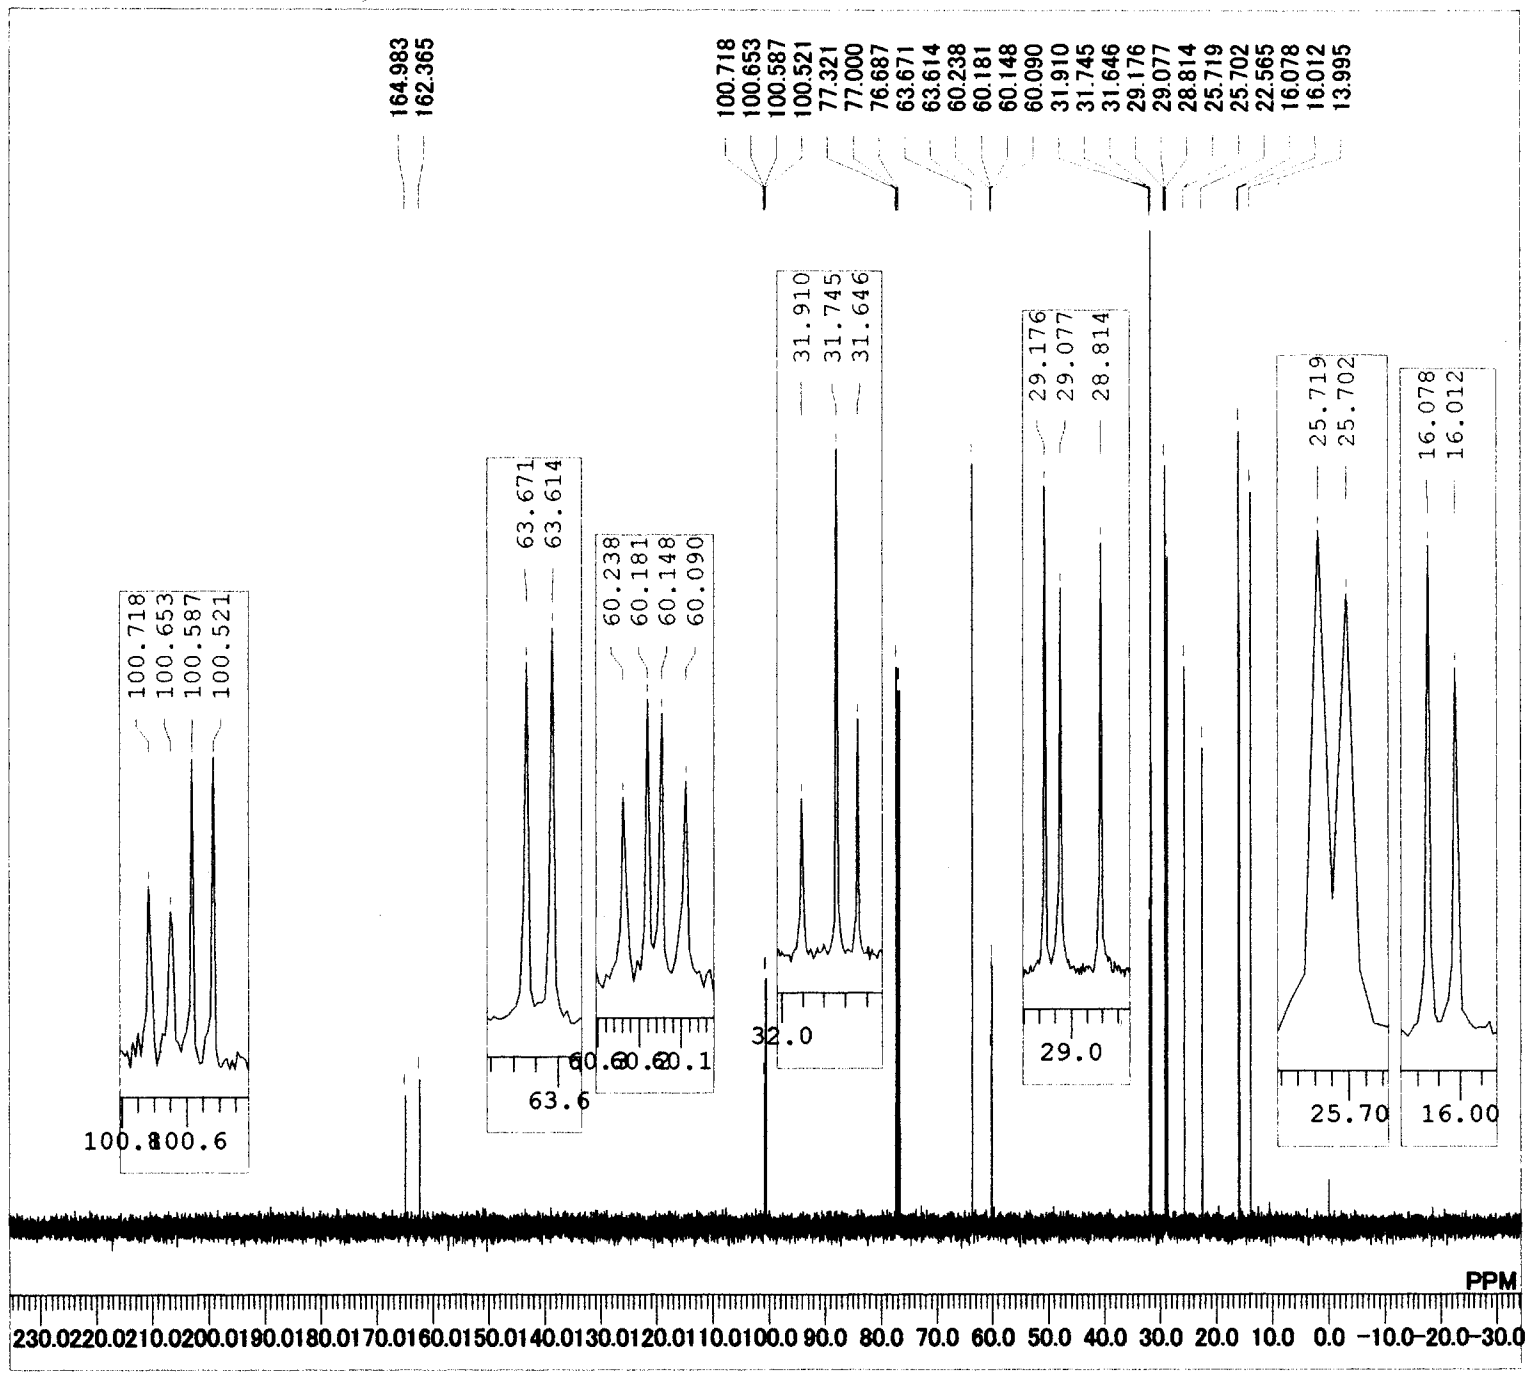

|       |                                       |
|-------|---------------------------------------|
| MENUF | 13C                                   |
| OBNUC | 13C                                   |
| OFR   | 100.40 MHz                            |
| OBSET | 125.00 KHz                            |
| OBFIN | 10500.00 Hz                           |
| PW1   | 6.00 usec                             |
| DEADT | 19.10 usec                            |
| PREDL | 0.20000 msec                          |
| IWT   | 1.0000 msec                           |
| POINT | 32768                                 |
| SPO   | 32768                                 |
| TIMES | 256                                   |
| DUMMY | 1                                     |
| FREQU | 27118.64 Hz                           |
| FLT   | 13550 Hz                              |
| DELAY | 14.80 usec                            |
| ACQTM | 1.2083 sec                            |
| PD    | 1.7920 sec                            |
| ADBIT | 16                                    |
| RGAIN | 25                                    |
| BF    | 0.10 Hz                               |
| T1    | 0.00                                  |
| T2    | 0.00                                  |
| T3    | 90.00                                 |
| T4    | 100.00                                |
| EXMOD | BCM                                   |
| EXPCM | Bilevel.complete.decoupling:Set_IRRP1 |
| IRNUC | 1H                                    |
| IFR   | 399.65 MHz                            |
| IRSET | 124.00 KHz                            |
| IRFIN | 10500.00 Hz                           |
| IRRPW | 45 usec                               |
| IRATN | 511                                   |
| DFILE | 08311 allyl-OP R=Oc (C).als           |
| SF    | TH5ATFG2                              |
| LKSET | 61.60 KHz                             |
| LKFIN | 79.0 Hz                               |
| LKLEV | 180                                   |
| LGAIN | 26                                    |
| LKPHS | 219                                   |
| LKSIG | 1526                                  |
| CSPED | 13 Hz                                 |
| FILDC |                                       |
| FILDF |                                       |

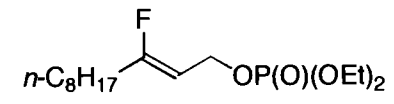

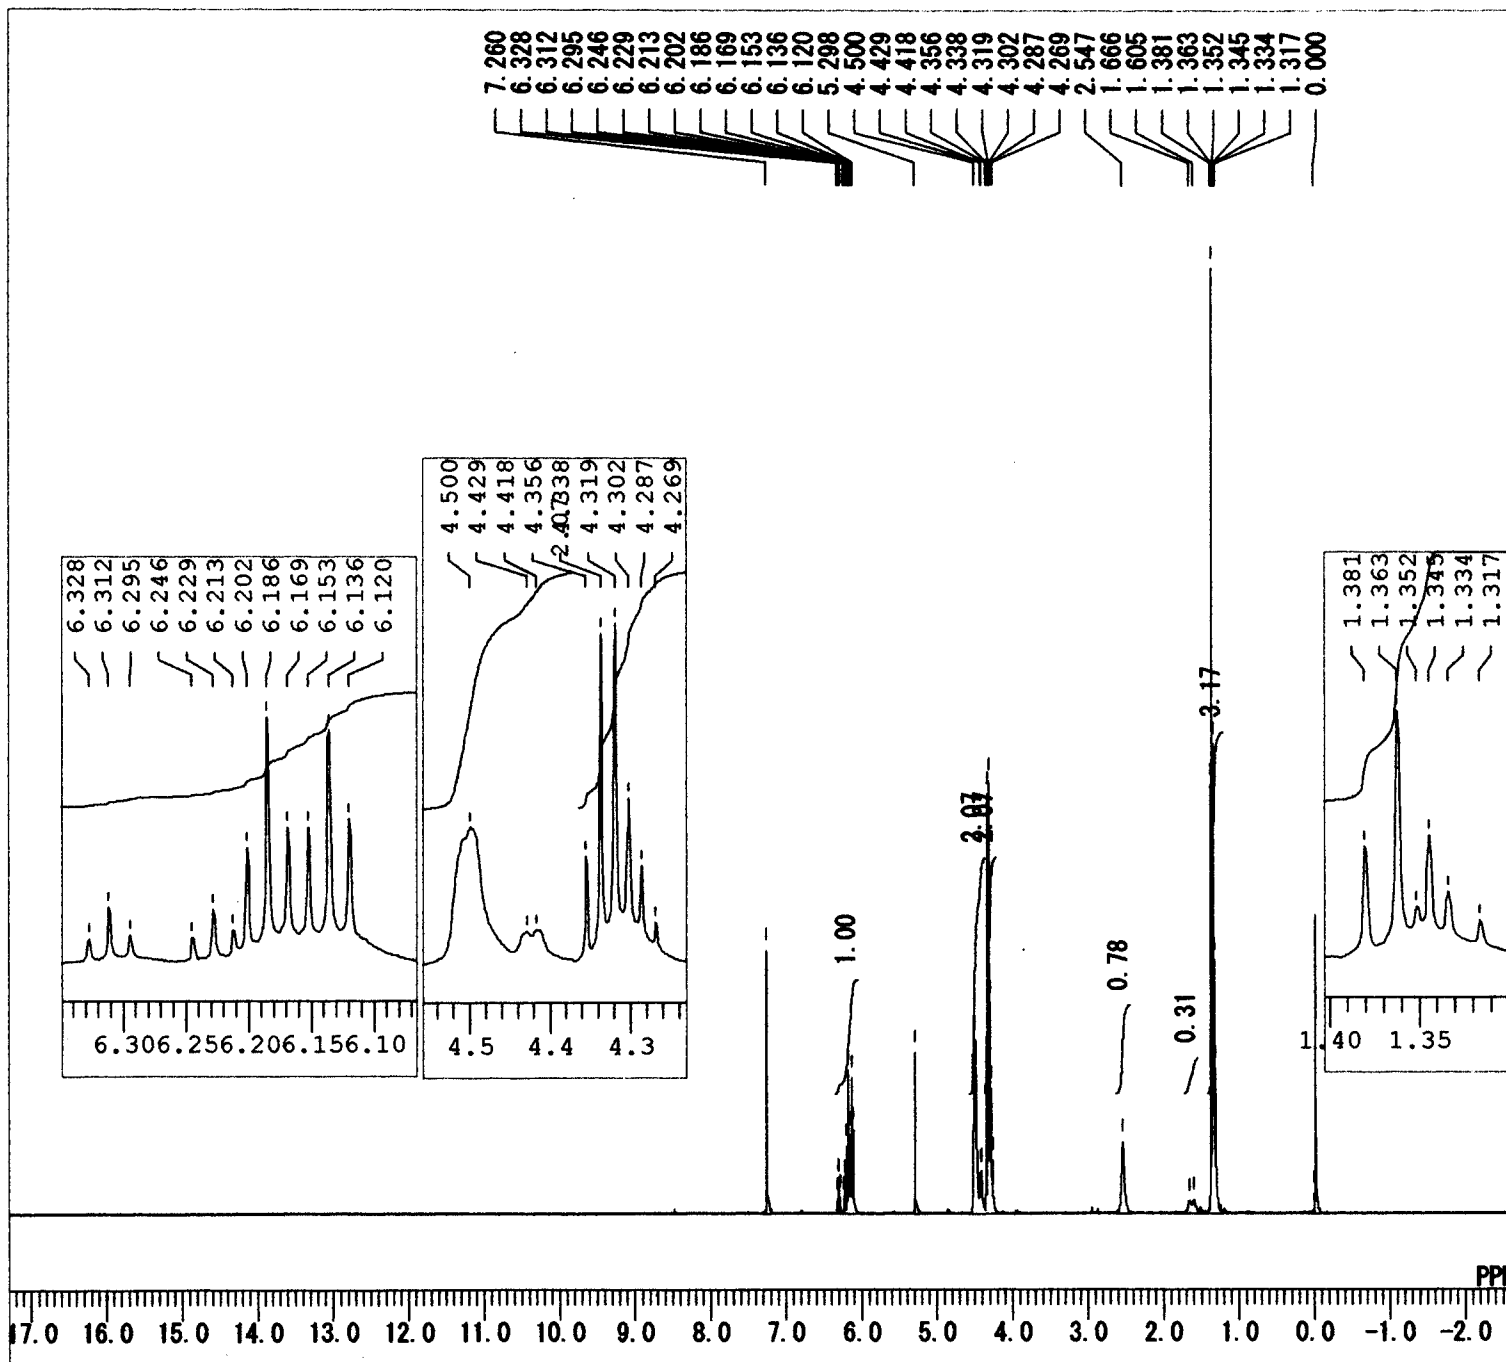

|       |                                 |
|-------|---------------------------------|
| MENUF | 1H                              |
| OBNUC | 1H                              |
| OFR   | 399.65 MHz                      |
| OBSET | 135.40 KHz                      |
| OBFIN | 24.90 Hz                        |
| PW1   | 5.20 usec                       |
| DEADT | 72.40 usec                      |
| PREDL | 0.20000 msec                    |
| IWT   | 1.0000 msec                     |
| POINT | 16384                           |
| SPO   | 16384                           |
| TIMES | 8                               |
| DUMMY | 1                               |
| FREQU | 7992.01 Hz                      |
| FLT   | 4000 Hz                         |
| DELAY | 50.00 usec                      |
| ACQTM | 2.0501 sec                      |
| PD    | 4.9500 sec                      |
| ADBIT | 16                              |
| RGAIN | 17                              |
| BF    | 0.10 Hz                         |
| T1    | 0.00                            |
| T2    | 0.00                            |
| T3    | 100.00                          |
| T4    | 100.00                          |
| EXMOD | NON                             |
| EXPCM | NON: Single. coupled: PW1_ACQTM |
| IRNUC | 1H                              |
| IFR   | 399.65 MHz                      |
| IRSET | 136.90 KHz                      |
| IRFIN | 97.50 Hz                        |
| IRRPW | 45 usec                         |
| IRATN | 511                             |
| DFILE | allyl OH R=C02Et (H). als       |
| SF    | TH5ATFG2                        |
| LKSET | 61.60 KHz                       |
| LKFIN | 79.0 Hz                         |
| LKLEV | 180                             |
| LGAIN | 23                              |
| LKPHS | 219                             |
| LKSIG | 753 Hz                          |
| CSPED | 11 Hz                           |
| FILDC |                                 |
| FILDF |                                 |

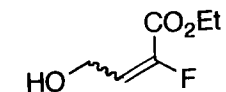

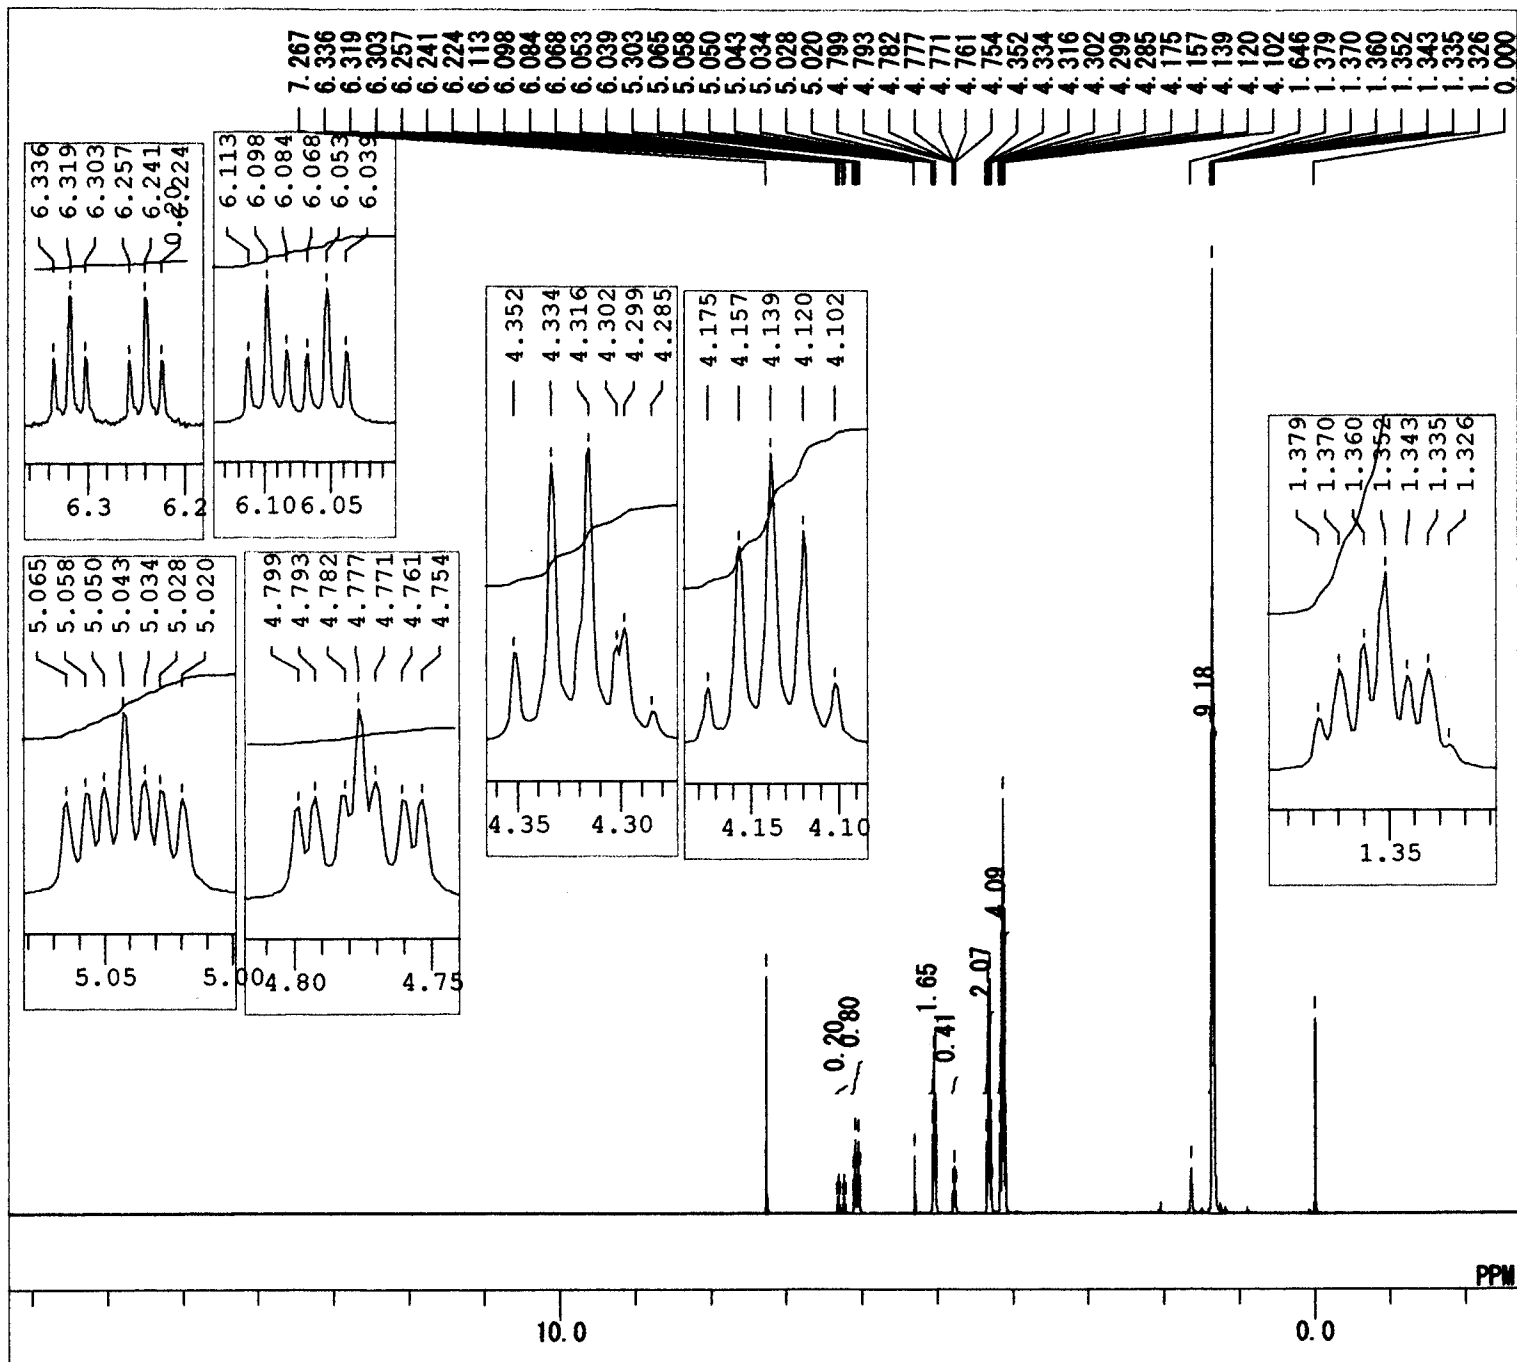

|       |                               |
|-------|-------------------------------|
| MENUF | 1H                            |
| OBNUC | 1H                            |
| OFR   | 399.65 MHz                    |
| OBSET | 135.40 KHz                    |
| OBFIN | 24.90 Hz                      |
| PW1   | 5.20 usec                     |
| DEADT | 72.40 usec                    |
| PREDL | 0.20000 msec                  |
| IWT   | 1.0000 msec                   |
| POINT | 16384                         |
| SPO   | 16384                         |
| TIMES | 8                             |
| DUMMY | 1                             |
| FREQU | 7992.01 Hz                    |
| FLT   | 4000 Hz                       |
| DELAY | 50.00 usec                    |
| ACQTM | 2.0501 sec                    |
| PD    | 4.9500 sec                    |
| ADBIT | 16                            |
| RGAIN | 16                            |
| BF    | 0.10 Hz                       |
| T1    | 0.00                          |
| T2    | 0.00                          |
| T3    | 100.00                        |
| T4    | 100.00                        |
| EXMOD | NON                           |
| EXPCM | NON:Single.coupled:PW1_ACQTM. |
| IRNUC | 1H                            |
| IFR   | 399.65 MHz                    |
| IRSET | 136.90 KHz                    |
| IRFIN | 97.50 Hz                      |
| IRRPW | 45 usec                       |
| IRATN | 511                           |
| DFILE | allyl OP R-CO2Et(H). als      |
| SF    | TH5ATFG2                      |
| LKSET | 61.60 KHz                     |
| LKFIN | 79.0 Hz                       |
| LKLEV | 180                           |
| LGAIN | 22                            |
| LKPHS | 219                           |
| LKSIG | 543                           |
| CSPED | 11 Hz                         |
| FILDC |                               |
| FILDF |                               |

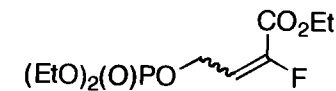



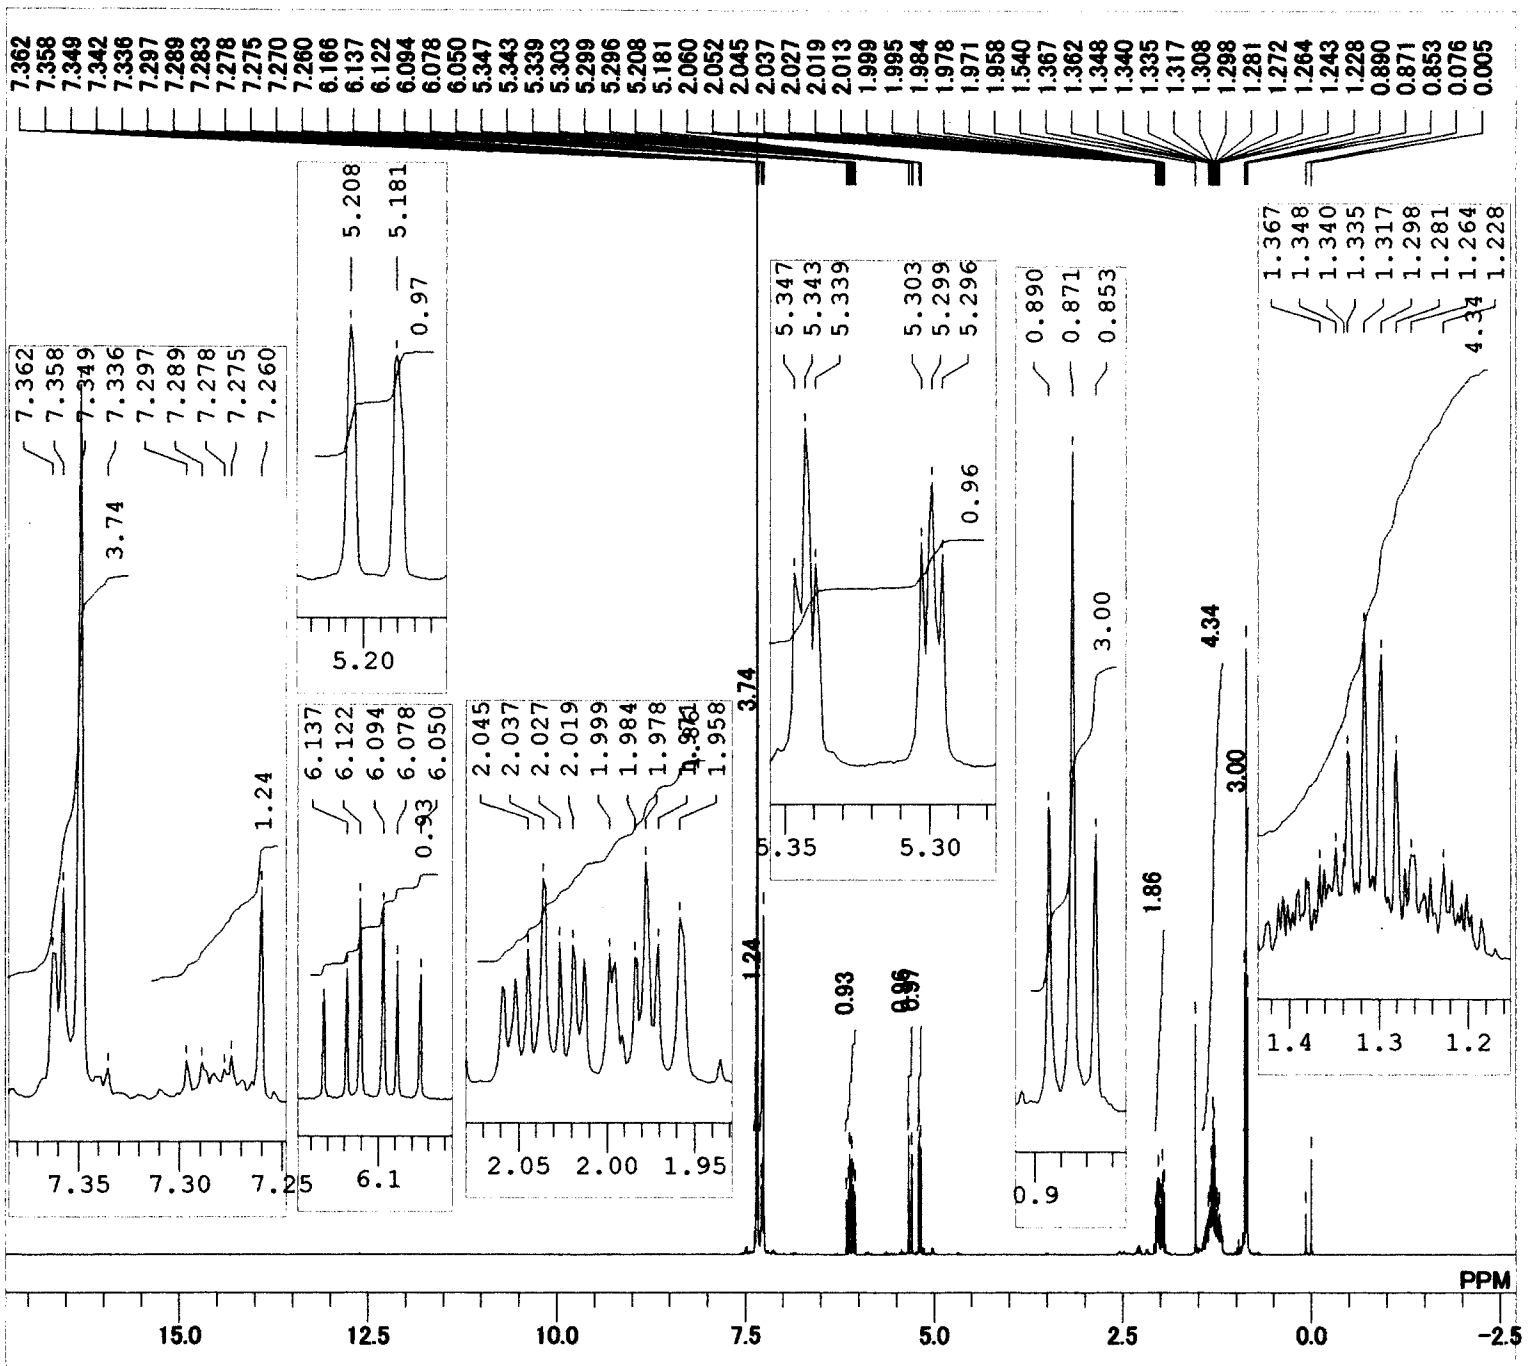

|       |                                  |
|-------|----------------------------------|
| MENUF | 1H                               |
| OBNUC | 1H                               |
| OFR   | 399.65 MHz                       |
| OBSET | 135.40 KHz                       |
| OBFIN | 24.90 Hz                         |
| PW1   | 5.50 usec                        |
| DEADT | 72.20 usec                       |
| PREDL | 0.20000 msec                     |
| IWT   | 1.0000 msec                      |
| POINT | 16384                            |
| SPO   | 16384                            |
| TIMES | 8                                |
| DUMMY | 1                                |
| FREQU | 7992.01 Hz                       |
| FLT   | 4000 Hz                          |
| DELAY | 50.00 usec                       |
| ACQTM | 2.0501 sec                       |
| PD    | 4.9500 sec                       |
| ADBIT | 16                               |
| RGAIN | 17                               |
| BF    | 0.10 Hz                          |
| T1    | 0.00                             |
| T2    | 0.00                             |
| T3    | 90.00                            |
| T4    | 100.00                           |
| EXMOD | NON                              |
| EXPCM | NON:Single.coupled:PW1_ACQTM_PD: |
| IRNUC | 1H                               |
| IFR   | 399.65 MHz                       |
| IRSET | 136.90 KHz                       |
| IRFIN | 97.50 Hz                         |
| IRRPW | 45 usec                          |
| IRATN | 511                              |
| DFILE | _DEFAULT.ALS                     |
| SF    | TH5AT                            |
| LKSET | 61.60 KHz                        |
| LKFIN | 79.0 Hz                          |
| LKLEV | 200                              |
| LGAIN | 21                               |
| LKPHS | 255                              |
| LKSIG | 1422                             |
| CSPED | 12 Hz                            |
| FILDC |                                  |
| FILDF |                                  |

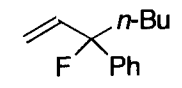



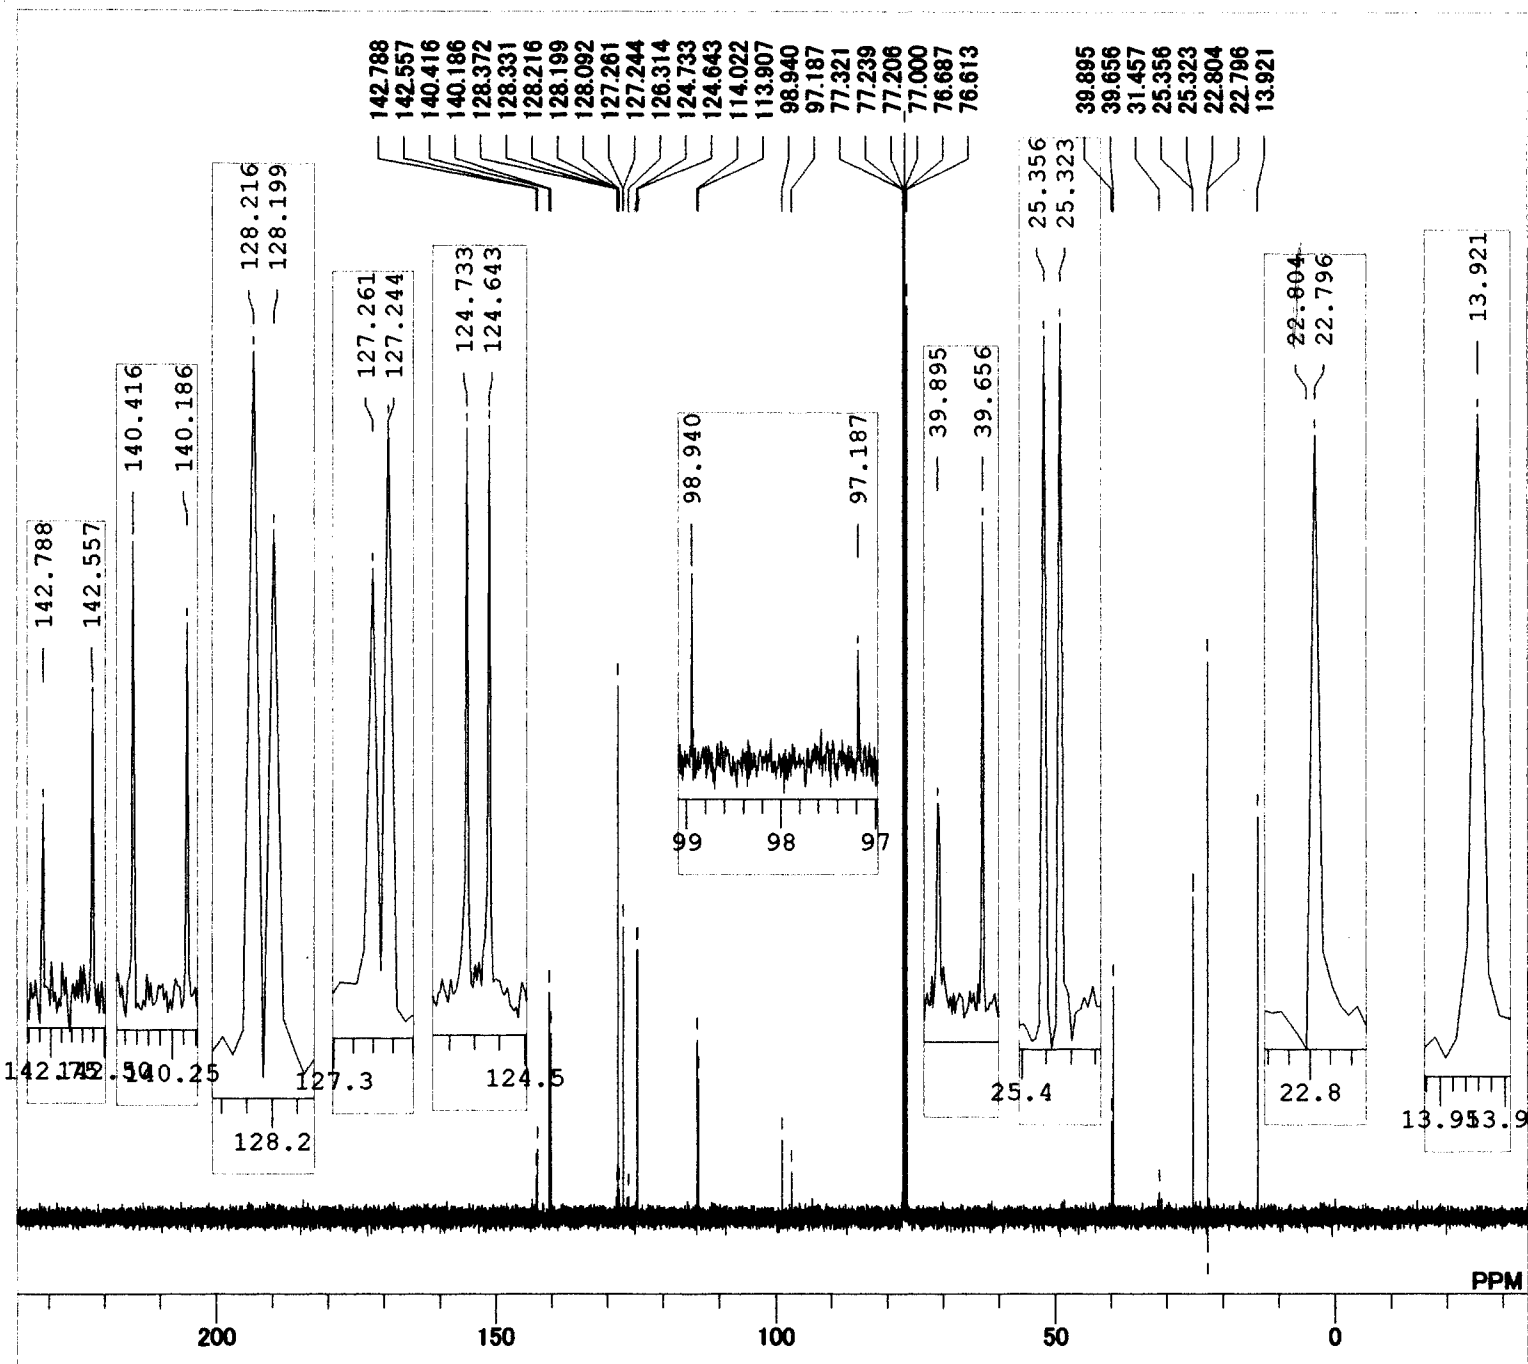

MENUF 13C  
 OBNUC 13C  
 OFR 100.40 MHz  
 OBSET 125.00 KHz  
 OBFIN 10500.00 Hz  
 PW1 5.70 usec  
 DEADT 19.30 usec  
 PREDL 0.20000 msec  
 IWT 1.0000 msec  
 POINT 32768  
 SPO 32768  
 TIMES 10000  
 DUMMY 1  
 FREQU 27118.64 Hz  
 FLT 13550 Hz  
 DELAY 14.80 usec  
 ACQTM 1.2083 sec  
 PD 1.7920 sec  
 ADBIT 16  
 RGAIN 25  
 BF 0.10 Hz  
 T1 0.00  
 T2 0.00  
 T3 90.00  
 T4 100.00  
 EXMOD BCM  
 EXPCM Bilevel.complete.decoupling: Set\_IRRP1  
 IRNUC 1H  
 IFR 399.65 MHz  
 IRSET 124.00 KHz  
 IRFIN 10500.00 Hz  
 IRRPW 45 usec  
 IRATN 511  
 DFILE \_DEFAULT.ALS  
 SF TH5AT  
 LKSET 61.60 KHz  
 LKFIN 79.0 Hz  
 LKLEV 200  
 LGAIN 21  
 LKPHS 255  
 LKSIG 1391  
 CSPED 13 Hz  
 FILDC  
 FILDF

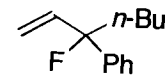

auto

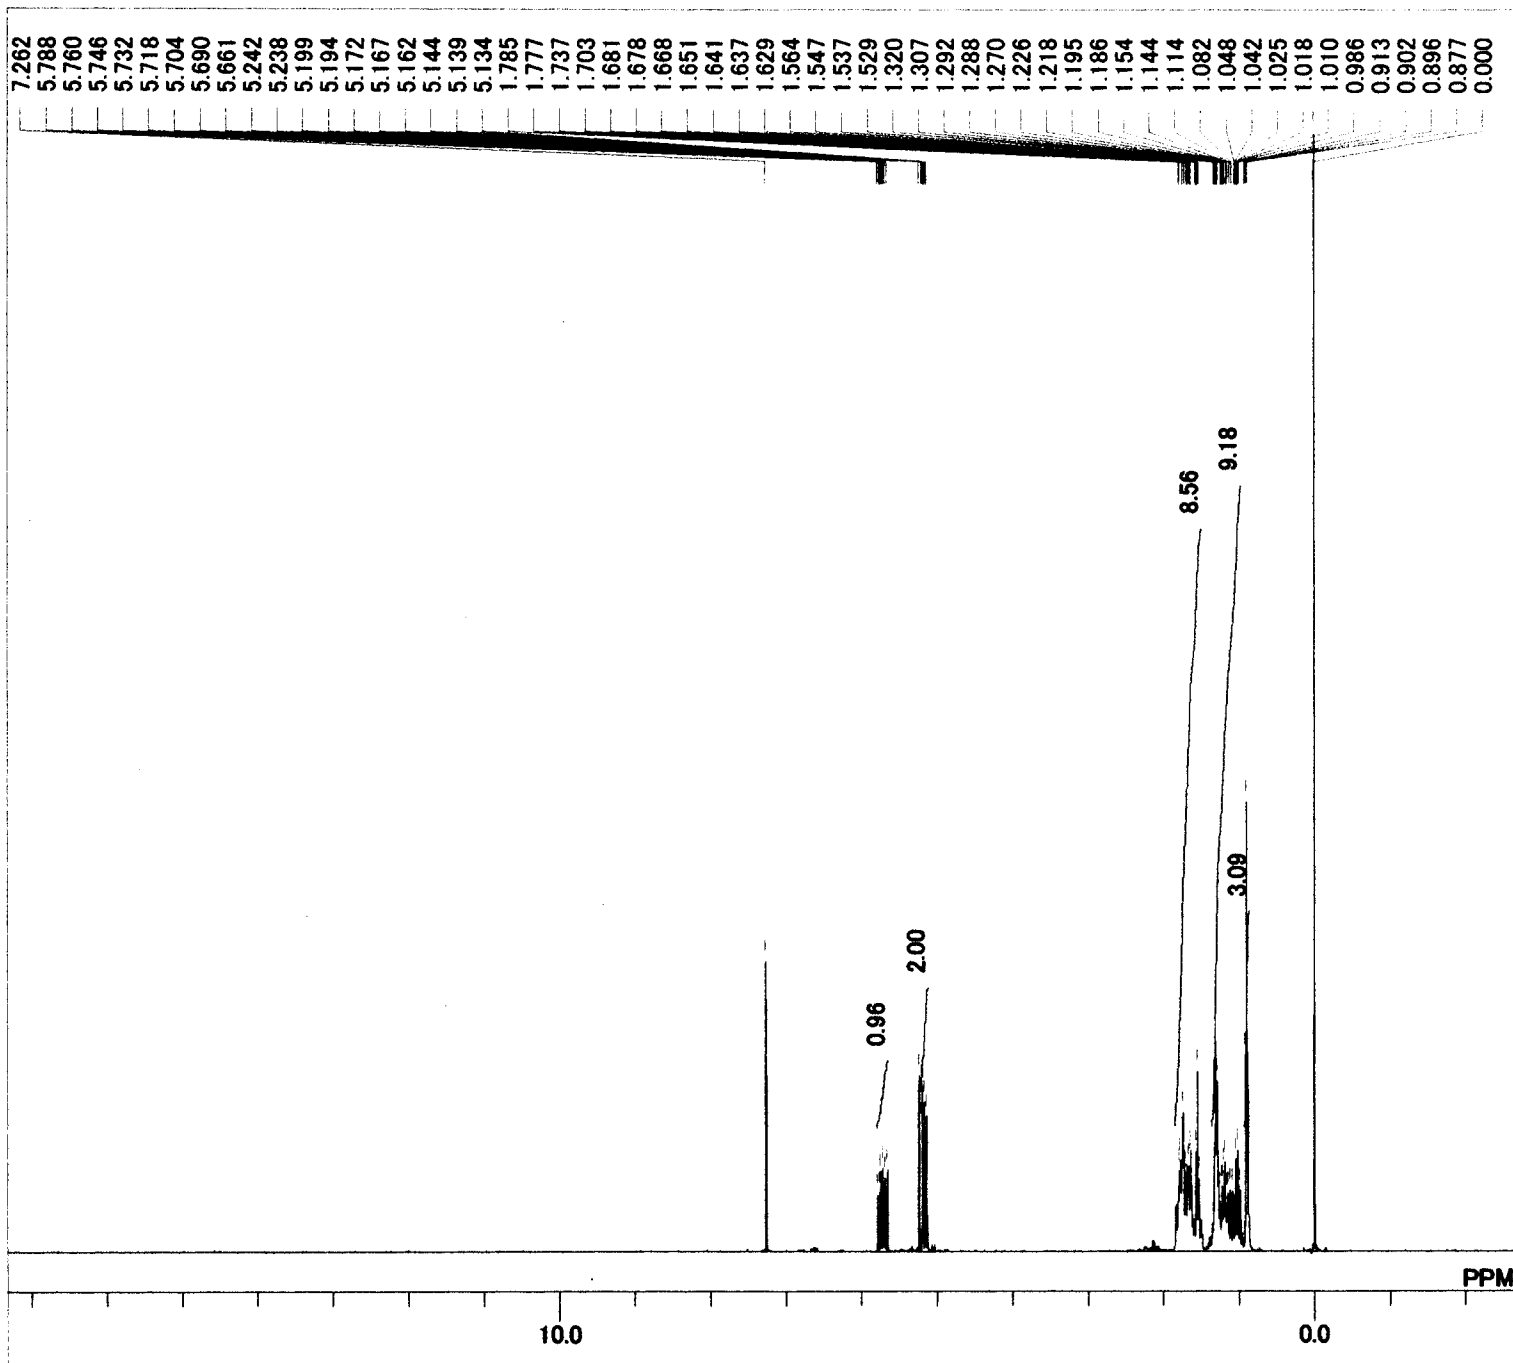

MENUF 1H  
OBNUC 1H  
OFR 399.65 MHz  
OBSET 135.40 KHz  
OBFIN 24.90 Hz  
PW1 5.20 usec  
DEADT 72.40 usec  
PREDL 0.20000 msec  
IWT 1.0000 msec  
POINT 16384  
SPO 16384  
TIMES 8  
DUMMY 1  
FREQU 7992.01 Hz  
FLT 4000 Hz  
DELAY 50.00 usec  
ACQTM 2.0501 sec  
PD 4.9500 sec  
ADBIT 16  
RGAIN 15  
BF 0.10 Hz  
T1 0.00  
T2 0.00  
T3 90.00  
T4 100.00  
EXMOD NON  
EXPCM NON:Single.coupled:PW1\_ACQTM\_PD:  
IRNUC 1H  
IFR 399.65 MHz  
IRSET 136.90 KHz  
IRFIN 97.50 Hz  
IRRPW 45 usec  
IRATN 511  
DFILE 08509 Sn2' R=Cy with Bu H.als  
SF TH5ATFG2  
LKSET 61.60 KHz  
LKFIN 79.0 Hz  
LKLEV 180  
LGAIN 23  
LKPHS 219  
LKSIG 1104  
CSPED 11 Hz  
FILDC  
FILDF

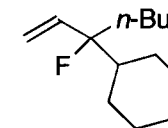

auto

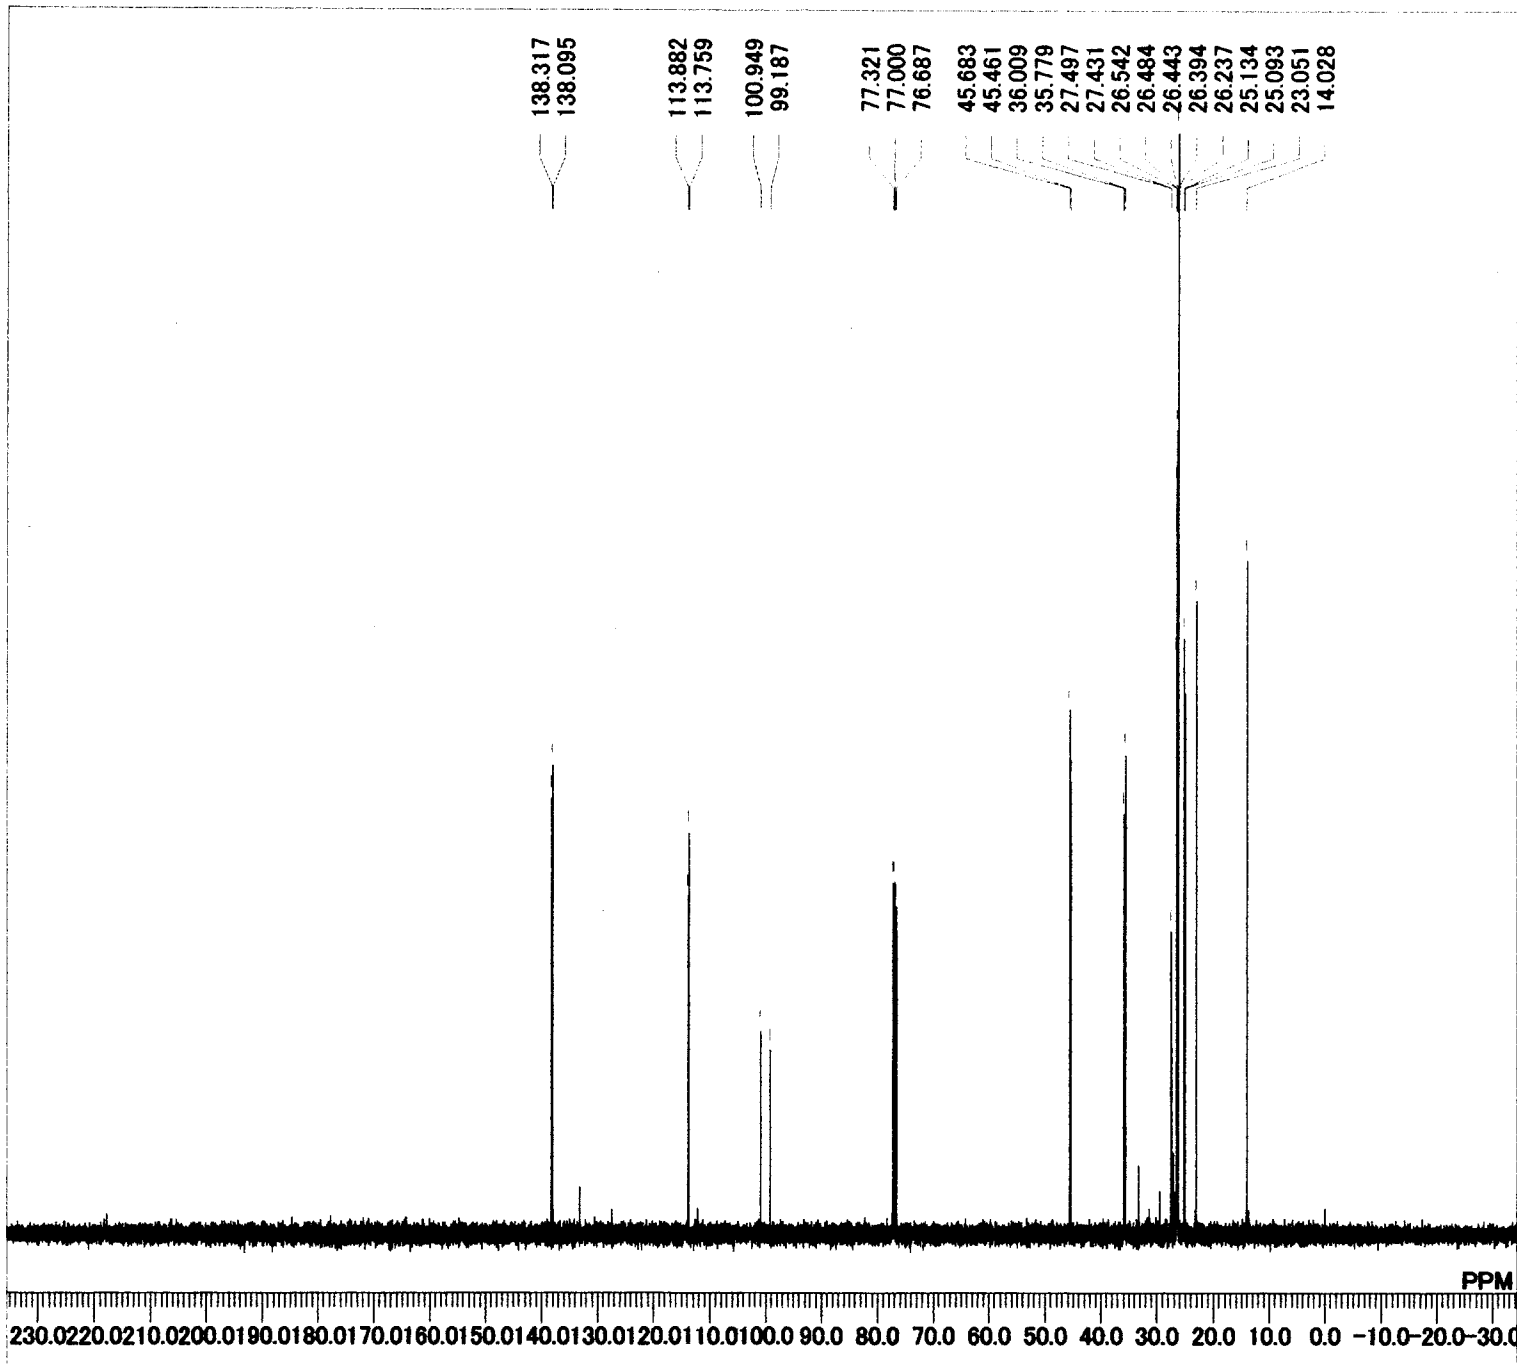

MENUF 13C  
OBNUC 13C  
OFR 100.40 MHz  
OBSET 125.00 KHz  
OBFIN 10500.00 Hz  
PW1 6.00 usec  
DEADT 19.10 usec  
PREDL 0.20000 msec  
IWT 1.0000 msec  
POINT 32768  
SPO 32768  
TIMES 256  
DUMMY 1  
FREQU 27118.64 Hz  
FLT 13550 Hz  
DELAY 14.80 usec  
ACQTM 1.2083 sec  
PD 1.7920 sec  
ADBIT 16  
RGAIN 25  
BF 0.10 Hz  
T1 0.00  
T2 0.00  
T3 90.00  
T4 100.00  
EXMOD BCM  
EXPCM Bilevel.complete.decoupling:Set\_IRRP1  
IRNUC 1H  
IFR 399.65 MHz  
IRSET 124.00 KHz  
IRFIN 10500.00 Hz  
IRRPW 45 usec  
IRATN 511  
DFILE 08509 Sn2' R=Cy with Bu C.als  
SF TH5ATFG2  
LKSET 61.60 KHz  
LKFIN 79.0 Hz  
LKLEV 180  
LGAIN 25  
LKPHS 219  
LKSIG 1776  
CSPED 12 Hz  
FILDC  
FILDF

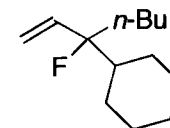

auto

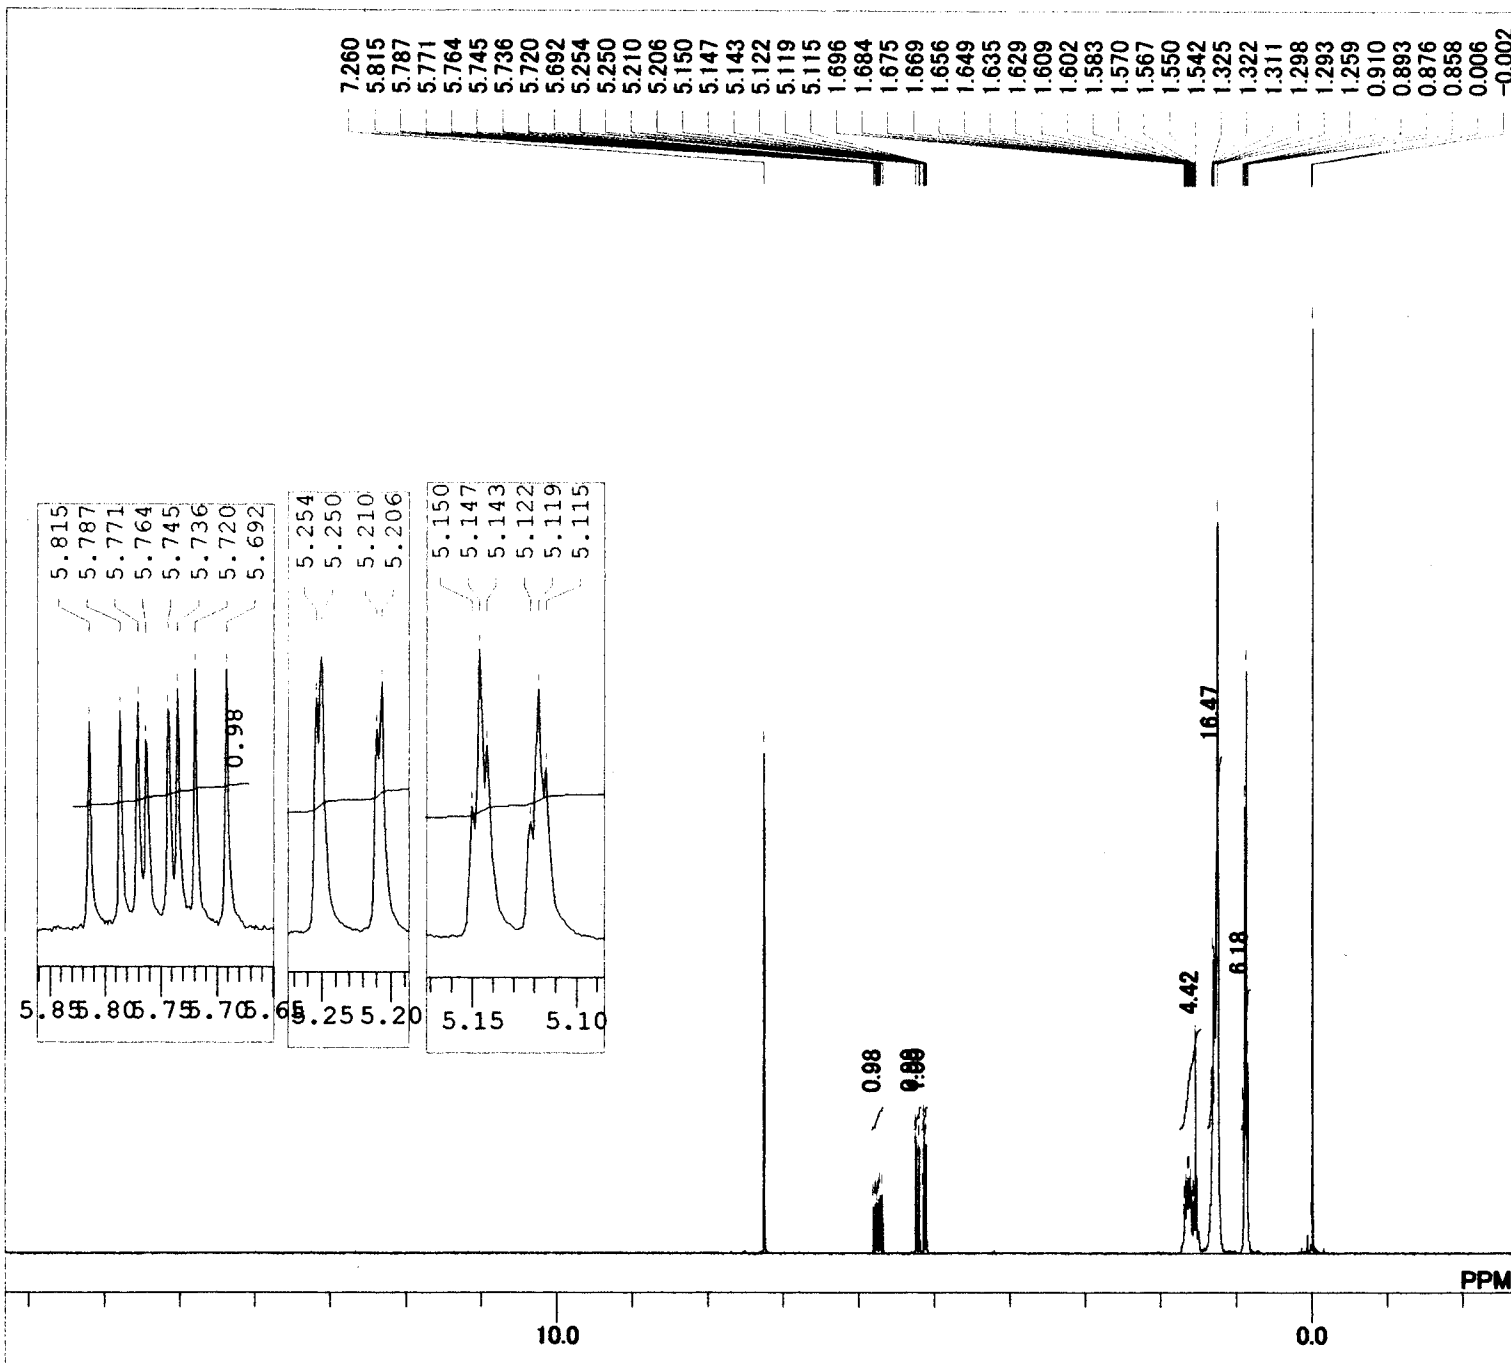

|       |                                  |
|-------|----------------------------------|
| MENUF | 1H                               |
| OBNUC | 1H                               |
| OFR   | 399.65 MHz                       |
| OBSET | 135.40 KHz                       |
| OBFIN | 24.90 Hz                         |
| PW1   | 5.20 usec                        |
| DEADT | 72.40 usec                       |
| PREDL | 0.20000 msec                     |
| IWT   | 1.0000 msec                      |
| POINT | 16384                            |
| SPO   | 16384                            |
| TIMES | 8                                |
| DUMMY | 1                                |
| FREQU | 7992.01 Hz                       |
| FLT   | 4000 Hz                          |
| DELAY | 50.00 usec                       |
| ACQTM | 2.0501 sec                       |
| PD    | 4.9500 sec                       |
| ADBIT | 16                               |
| RGAIN | 17                               |
| BF    | 0.10 Hz                          |
| T1    | 0.00                             |
| T2    | 0.00                             |
| T3    | 90.00                            |
| T4    | 100.00                           |
| EXMOD | NON                              |
| EXPCM | NON:Single.coupled:PW1_ACQTM_PD: |
| IRNUC | 1H                               |
| IFR   | 399.65 MHz                       |
| IRSET | 136.90 KHz                       |
| IRFIN | 97.50 Hz                         |
| IRRPW | 45 usec                          |
| IRATN | 511                              |
| DFILE | _DEFAULT.ALS                     |
| SF    | TH5ATFG2                         |
| LKSET | 61.60 KHz                        |
| LKFIN | 79.0 Hz                          |
| LKLEV | 180                              |
| LGAIN | 24                               |
| LKPHS | 219                              |
| LKSIG | 1394                             |
| CSPED | 12 Hz                            |
| FILDC |                                  |
| FILDF |                                  |

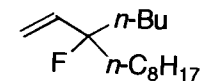

auto

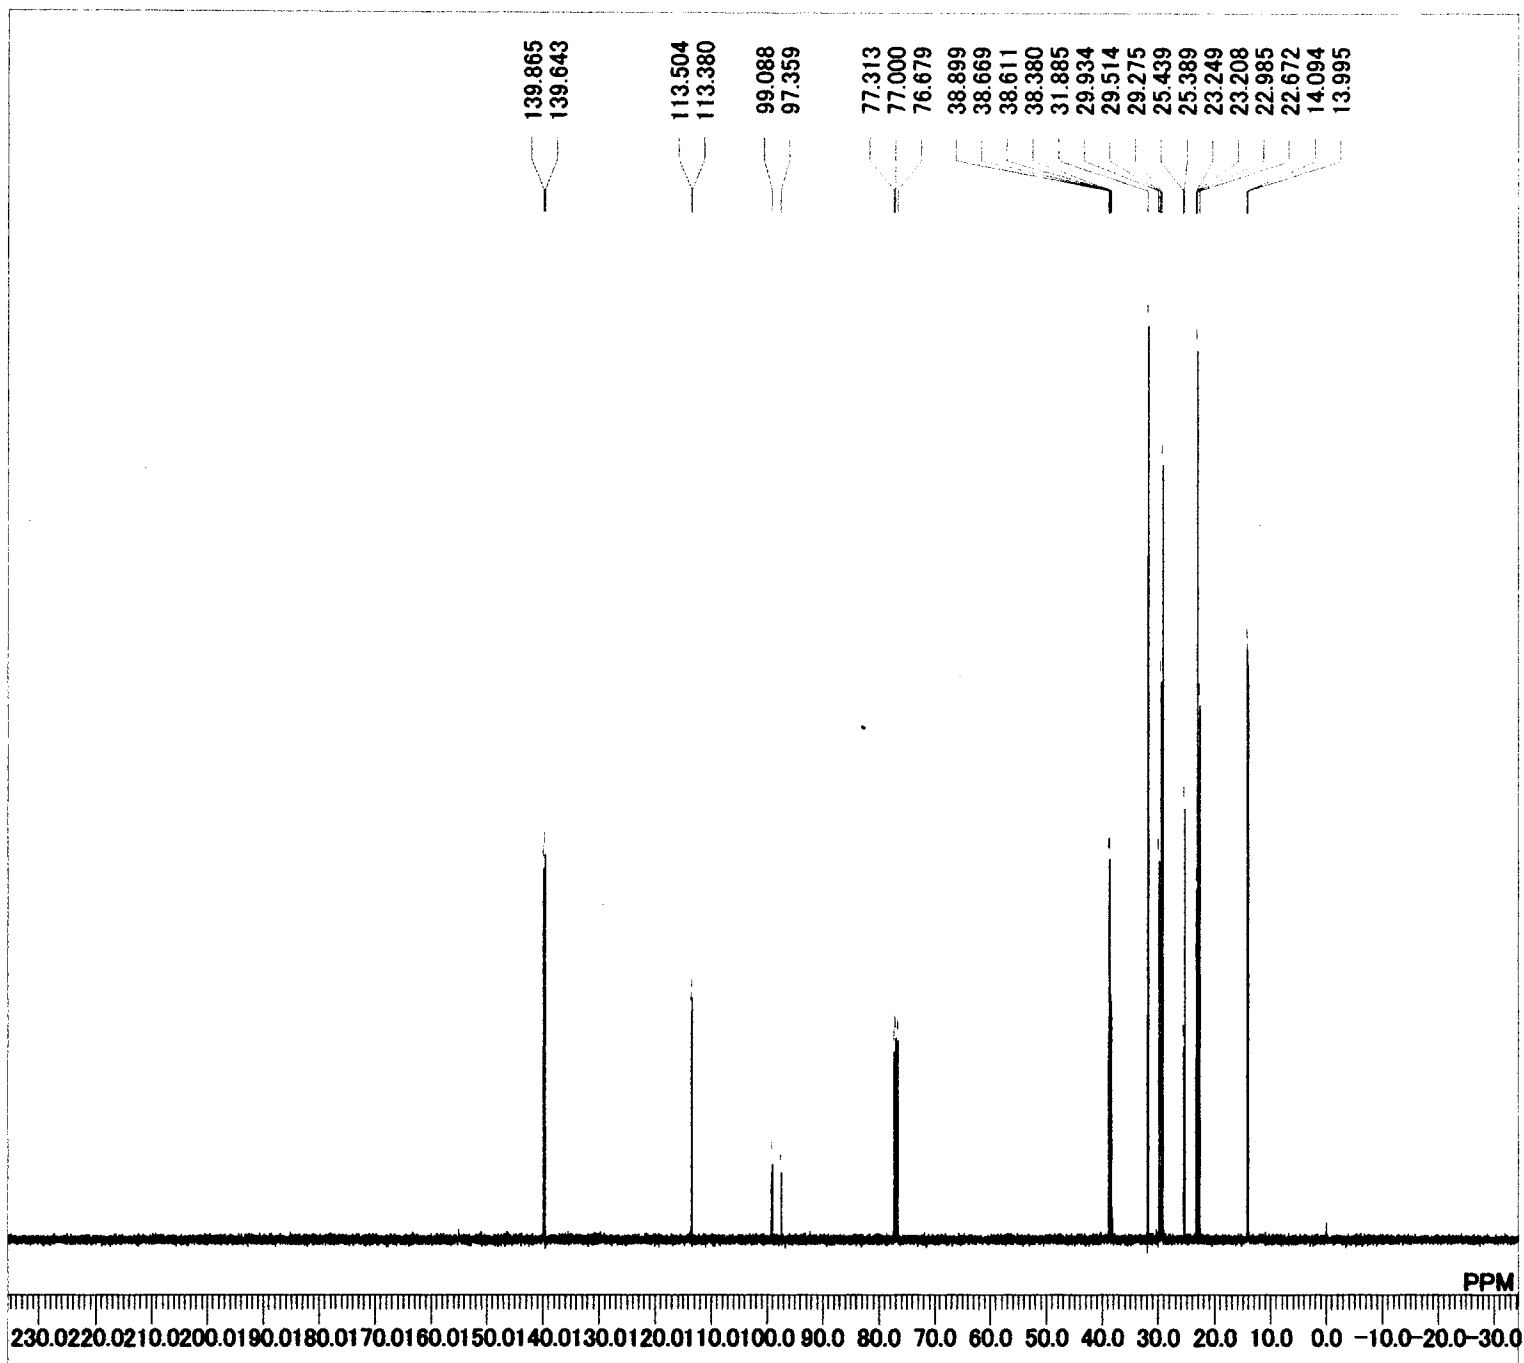

|       |                                       |
|-------|---------------------------------------|
| MENUF | 13C                                   |
| OBNUC | 13C                                   |
| OFR   | 100.40 MHz                            |
| OBSET | 125.00 KHz                            |
| OBFIN | 10500.00 Hz                           |
| PW1   | 6.00 usec                             |
| DEADT | 19.10 usec                            |
| PREDL | 0.20000 msec                          |
| IWT   | 1.0000 msec                           |
| POINT | 32768                                 |
| SPO   | 32768                                 |
| TIMES | 256                                   |
| DUMMY | 1                                     |
| FREQU | 27118.64 Hz                           |
| FLT   | 13550 Hz                              |
| DELAY | 14.80 usec                            |
| ACQTM | 1.2083 sec                            |
| PD    | 1.7920 sec                            |
| ADBIT | 16                                    |
| RGAIN | 25                                    |
| BF    | 0.10 Hz                               |
| T1    | 0.00                                  |
| T2    | 0.00                                  |
| T3    | 90.00                                 |
| T4    | 100.00                                |
| EXMOD | BCM                                   |
| EXPCM | Bilevel.complete.decoupling:Set_IRRP1 |
| IRNUC | 1H                                    |
| IFR   | 399.65 MHz                            |
| IRSET | 124.00 KHz                            |
| IRFIN | 10500.00 Hz                           |
| IRRPW | 45 usec                               |
| IRATN | 511                                   |
| DFILE | _DEFAULT.ALS                          |
| SF    | TH5ATFG2                              |
| LKSET | 61.60 KHz                             |
| LKFIN | 79.0 Hz                               |
| LKLEV | 180                                   |
| LGAIN | 23                                    |
| LKPHS | 219                                   |
| LKSIG | 935                                   |
| CSPED | 10 Hz                                 |
| FILDC |                                       |
| FILDF |                                       |

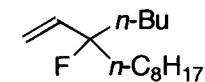

auto Rxn 150

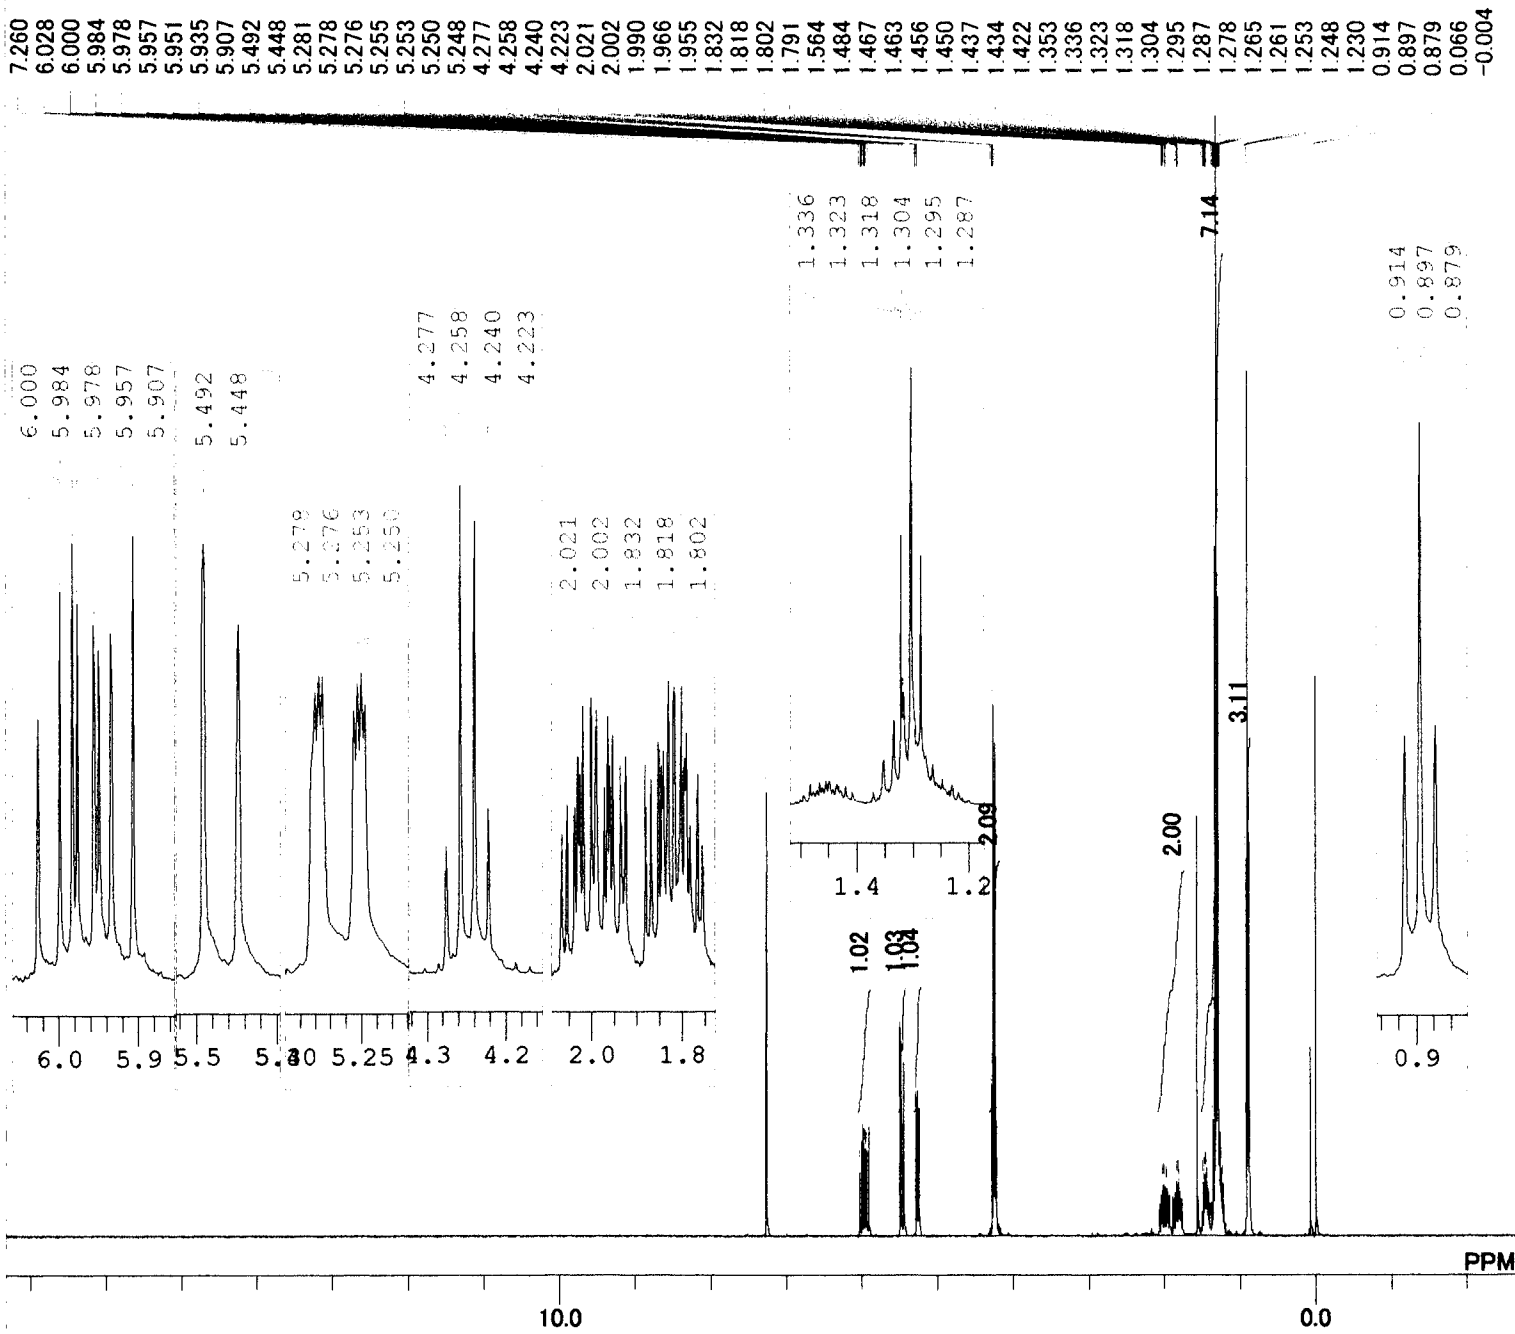

|       |                                  |
|-------|----------------------------------|
| MENUF | 1H                               |
| OBNUC | 1H                               |
| OFR   | 399.65 MHz                       |
| OBSET | 135.40 KHz                       |
| OBFIN | 24.90 Hz                         |
| PW1   | 5.20 usec                        |
| DEADT | 72.40 usec                       |
| PREDL | 0.2000 msec                      |
| IWT   | 1.0000 msec                      |
| POINT | 16384                            |
| SPO   | 16384                            |
| TIMES | 8                                |
| DUMMY | 1                                |
| FREQU | 7992.01 Hz                       |
| FLT   | 4000 Hz                          |
| DELAY | 50.00 usec                       |
| ACQTM | 2.0501 sec                       |
| PD    | 4.9500 sec                       |
| ADBIT | 16                               |
| RGAIN | 17                               |
| BF    | 0.10 Hz                          |
| T1    | 0.00                             |
| T2    | 0.00                             |
| T3    | 90.00                            |
| T4    | 100.00                           |
| EXMOD | NON                              |
| EXPCM | NON:Single.coupled:PW1_ACQTM_PD: |
| IRNUC | 1H                               |
| IFR   | 399.65 MHz                       |
| IRSET | 136.90 KHz                       |
| IRFIN | 97.50 Hz                         |
| IRRPW | 45 usec                          |
| IRATN | 511                              |
| DFILE | _DEFAULT.ALS                     |
| SF    | TH5ATFG2                         |
| LKSET | 61.60 KHz                        |
| LKFIN | 79.0 Hz                          |
| LKLEV | 180                              |
| LGAIN | 22                               |
| LKPHS | 219                              |
| LKSIG | 680                              |
| CSPED | 11 Hz                            |
| FILDC |                                  |
| FILDF |                                  |

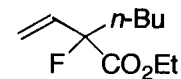

auto

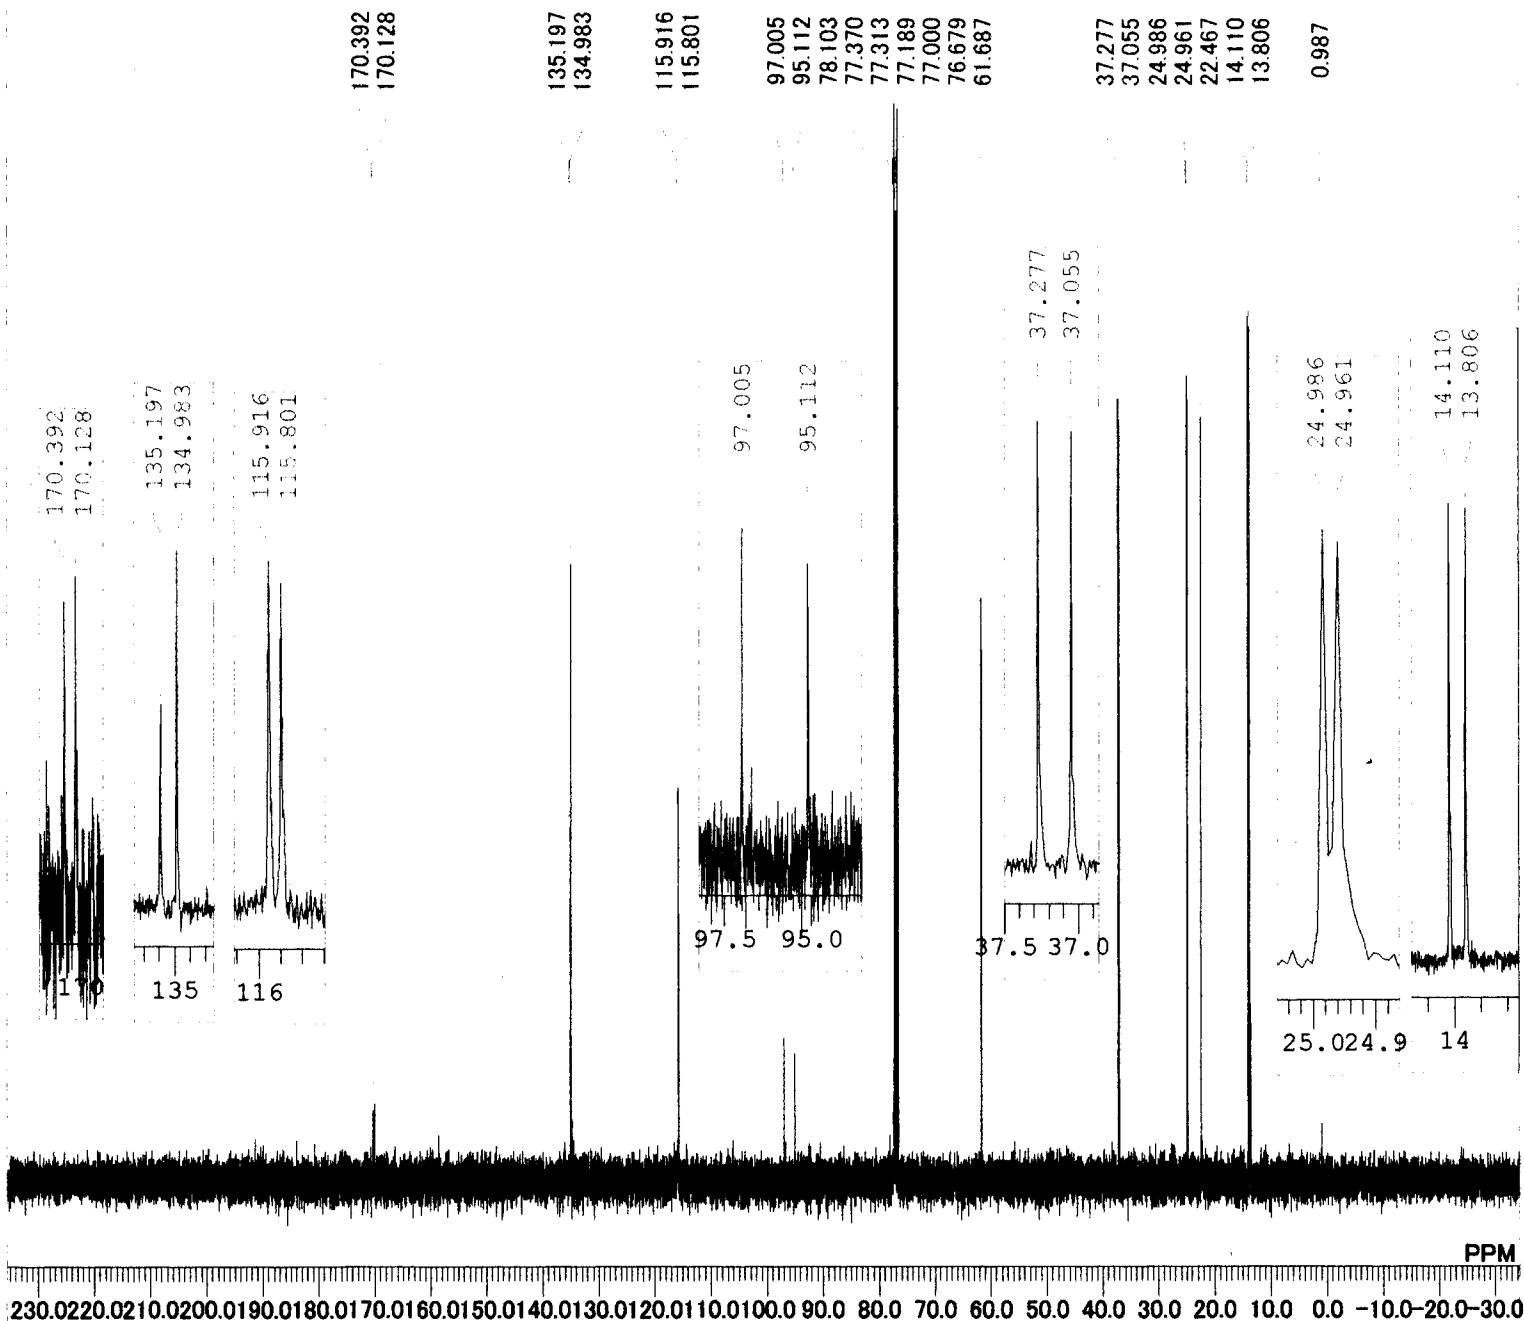

|       |                                       |
|-------|---------------------------------------|
| MENUF | 13C                                   |
| OBNUC | 13C                                   |
| OFR   | 100.40 MHz                            |
| OBSET | 125.00 KHz                            |
| OBFIN | 10500.00 Hz                           |
| PW1   | 6.00 usec                             |
| DEADT | 19.10 usec                            |
| PREDL | 0.20000 msec                          |
| IWT   | 1.0000 msec                           |
| POINT | 32768                                 |
| SPO   | 32768                                 |
| TIMES | 256                                   |
| DUMMY | 1                                     |
| FREQU | 27118.64 Hz                           |
| FLT   | 13550 Hz                              |
| DELAY | 14.80 usec                            |
| ACQTM | 1.2083 sec                            |
| PD    | 1.7920 sec                            |
| ADBIT | 16                                    |
| RGAIN | 25                                    |
| BF    | 0.10 Hz                               |
| T1    | 0.00                                  |
| T2    | 0.00                                  |
| T3    | 90.00                                 |
| T4    | 100.00                                |
| EXMOD | BCM                                   |
| EXPCM | Bilevel.complete.decoupling:Set_IRRP1 |
| IRNUC | 1H                                    |
| IFR   | 399.65 MHz                            |
| IRSET | 124.00 KHz                            |
| IRFIN | 10500.00 Hz                           |
| IRRPW | 45 usec                               |
| IRATN | 511                                   |
| DFILE | 08121.als                             |
| SF    | TH5ATFG2                              |
| LKSET | 61.60 KHz                             |
| LKFIN | 79.0 Hz                               |
| LKLEV | 180                                   |
| LGAIN | 23                                    |
| LKPHS | 219                                   |
| LKSIG | 823                                   |
| CSPED | 14 Hz                                 |
| FILDC |                                       |
| FILDF |                                       |

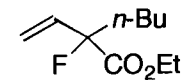

auto

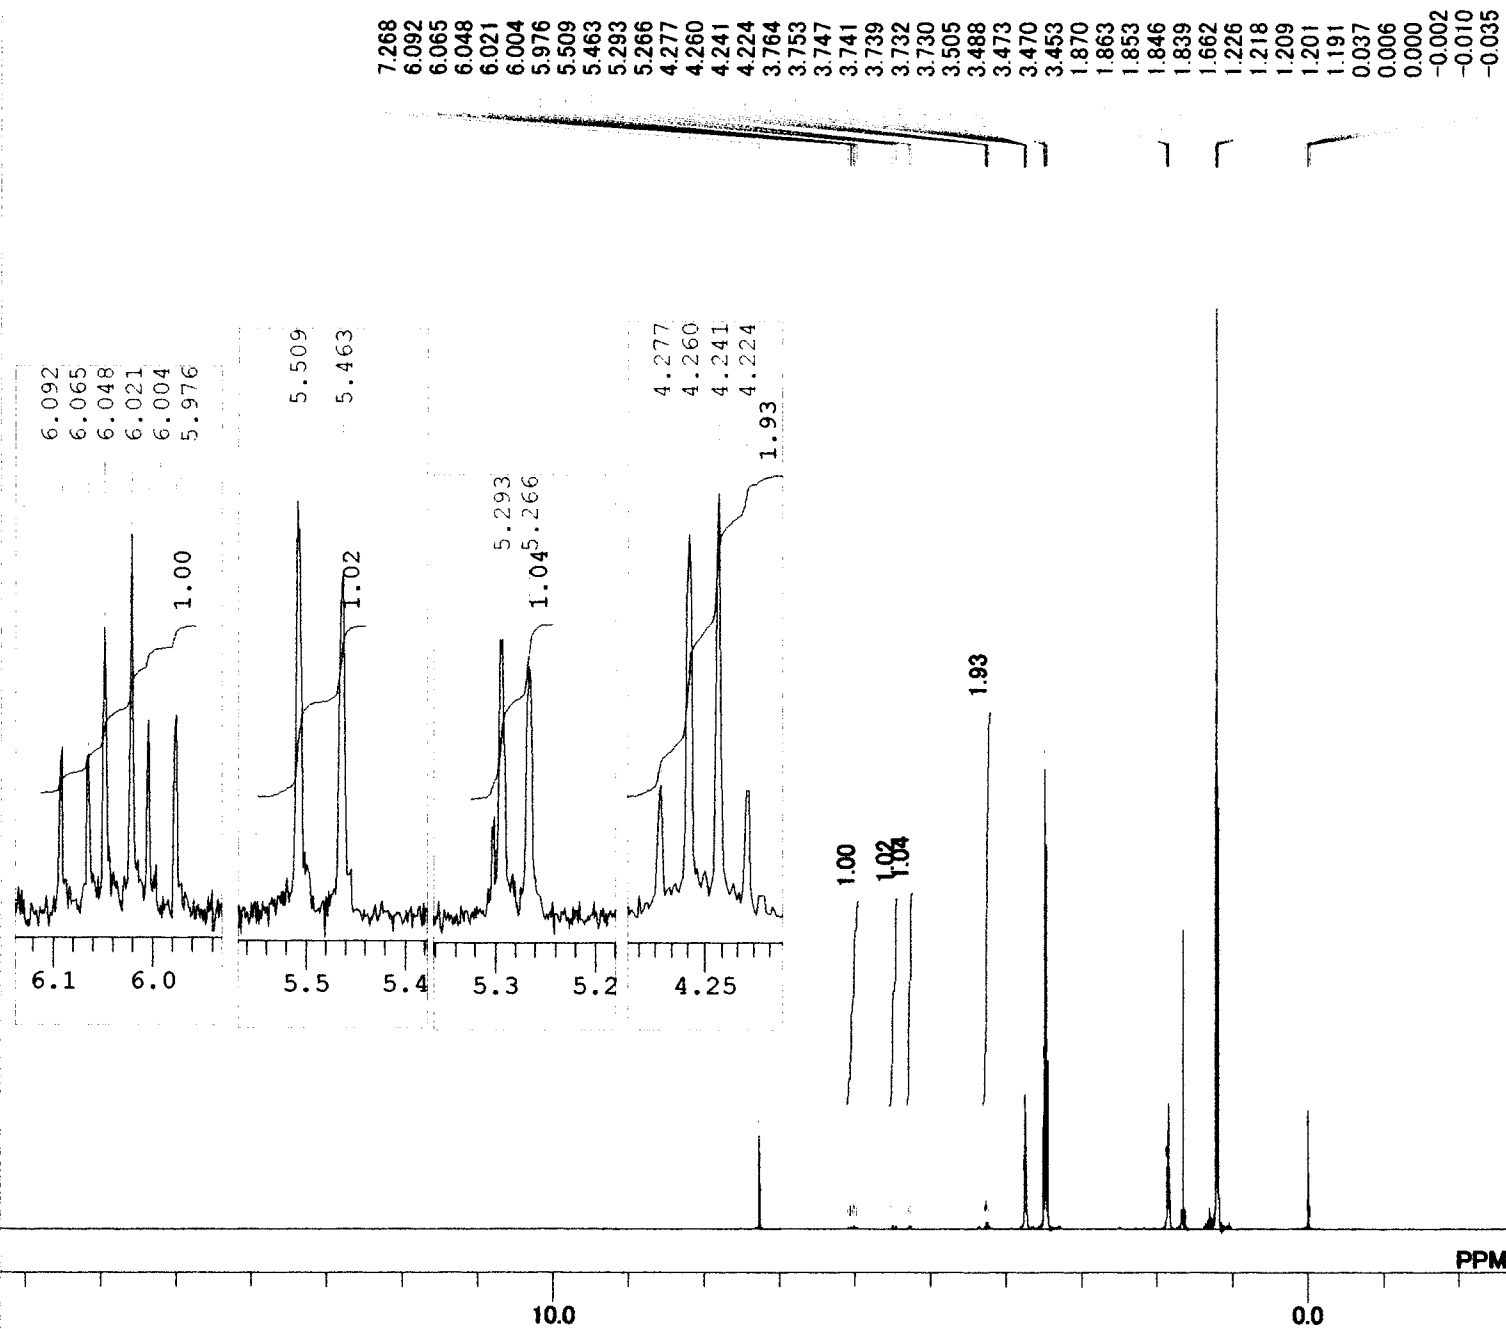

|       |                                    |
|-------|------------------------------------|
| MENUF | 1H                                 |
| OBNUC | 1H                                 |
| OFR   | 399.65 MHz                         |
| OBSET | 135.40 KHz                         |
| OBFIN | 24.90 Hz                           |
| PW1   | 5.80 usec                          |
| DEADT | 72.10 usec                         |
| PREDL | 0.20000 msec                       |
| IWT   | 1.0000 msec                        |
| POINT | 16384                              |
| SPO   | 16384                              |
| TIMES | 8                                  |
| DUMMY | 1                                  |
| FREQU | 7992.01 Hz                         |
| FLT   | 4000 Hz                            |
| DELAY | 50.00 usec                         |
| ACQTM | 2.0501 sec                         |
| PD    | 4.9500 sec                         |
| ADBIT | 16                                 |
| RGAIN | 16                                 |
| BF    | 0.00 Hz                            |
| T1    | 0.00                               |
| T2    | 0.00                               |
| T3    | 90.00                              |
| T4    | 100.00                             |
| EXMOD | NON                                |
| EXPCM | NON:Single.coupled:PW1_ACQTM_PD:   |
| IRNUC | 1H                                 |
| IFR   | 399.65 MHz                         |
| IRSET | 136.90 KHz                         |
| IRFIN | 97.50 Hz                           |
| IRRPW | 45 usec                            |
| IRATN | 511                                |
| DFILE | 081014 Sn2' R=CO2Et with MeLi (H): |
| SF    | TH5ATFG2                           |
| LKSET | 61.60 KHz                          |
| LKFIN | 79.0 Hz                            |
| LKLEV | 180                                |
| LGAIN | 26                                 |
| LKPHS | 231                                |
| LKSIG | 2349                               |
| CSPED | 11 Hz                              |
| FILDC |                                    |
| FILDF |                                    |

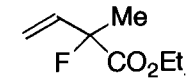



auto

7.301  
7.299  
7.284  
7.282  
7.265  
7.261  
7.210  
7.206  
7.190  
7.173  
7.156  
6.007  
5.979  
5.963  
5.957  
5.936  
5.930  
5.914  
5.886  
5.489  
5.447  
5.284  
5.282  
5.280  
5.260  
5.258  
5.255  
5.253  
4.262  
4.258  
4.244  
4.241  
4.225  
4.223  
4.208  
2.655  
2.636  
2.617  
1.870  
1.863  
1.858  
1.855  
1.851  
1.842  
1.834  
1.817  
1.655  
1.637  
1.576  
1.574  
1.304  
1.301  
1.286  
1.284  
1.268  
1.265  
0.004  
0.000

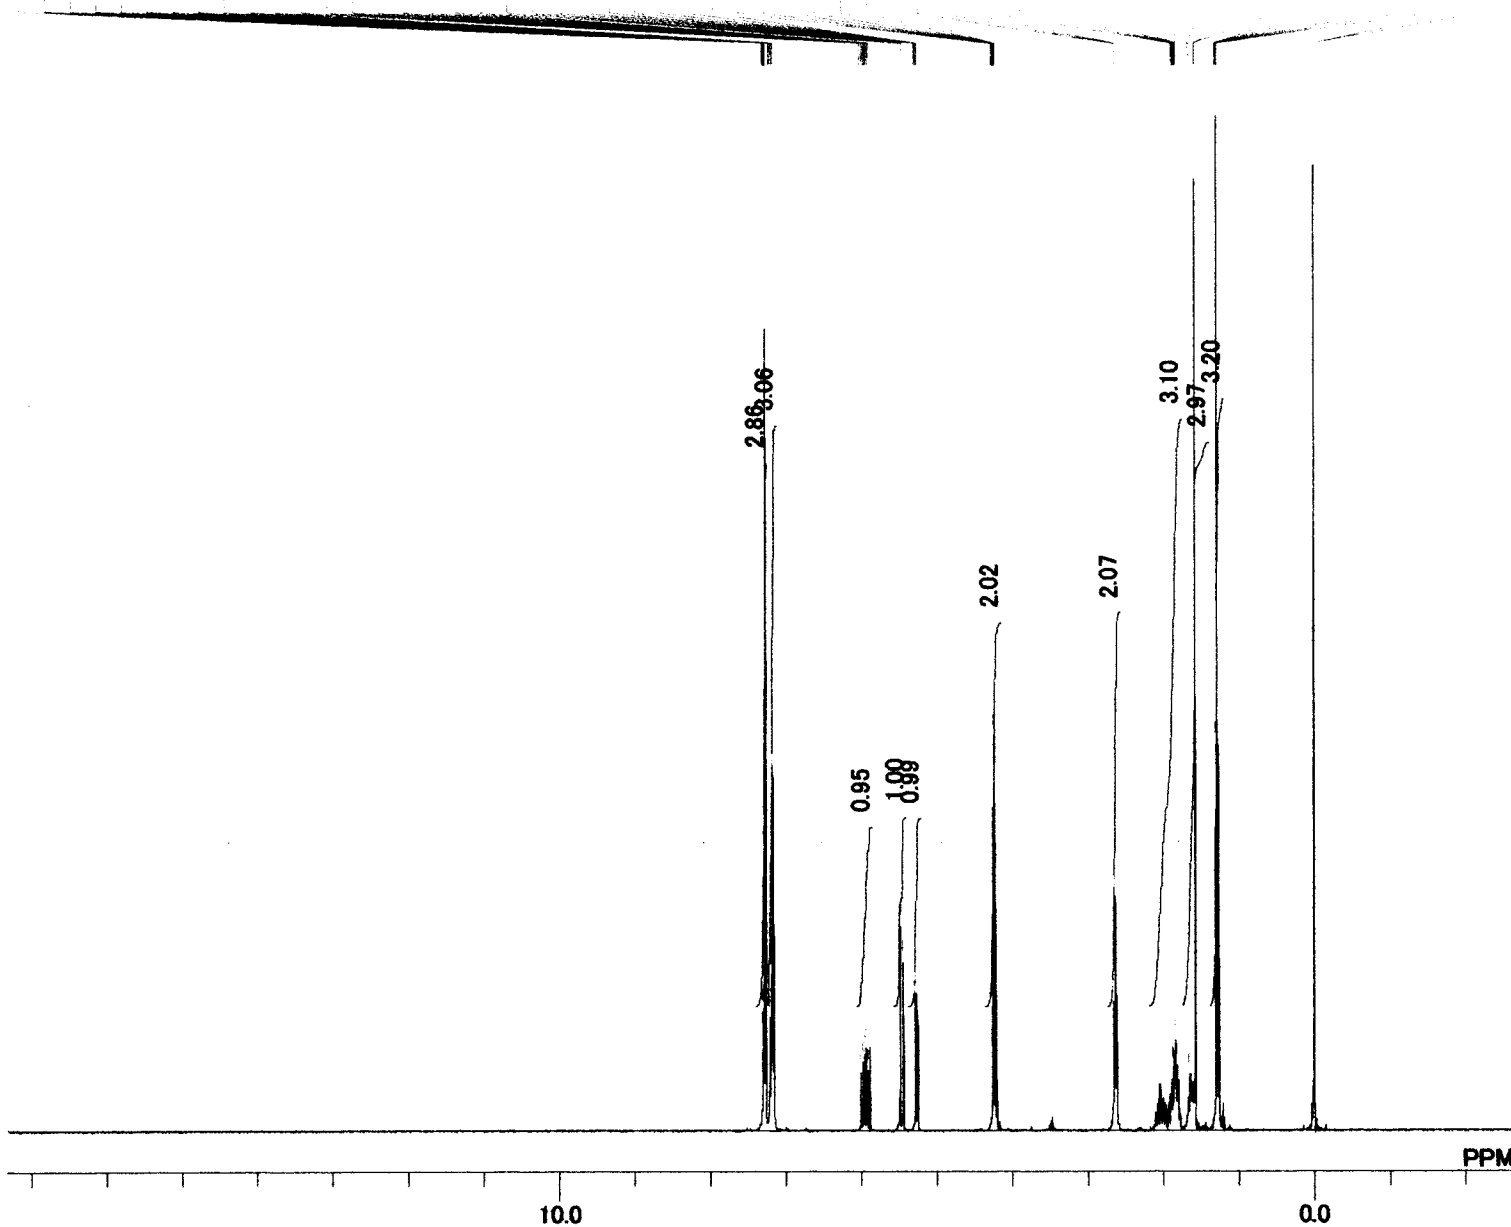

|       |                                  |
|-------|----------------------------------|
| MENUF | 1H                               |
| OBNUC | 1H                               |
| OFR   | 399.65 MHz                       |
| OBSET | 135.40 KHz                       |
| OBFIN | 24.90 Hz                         |
| PW1   | 5.20 usec                        |
| DEADT | 72.40 usec                       |
| PREDL | 0.20000 msec                     |
| IWT   | 1.0000 msec                      |
| POINT | 16384                            |
| SPO   | 16384                            |
| TIMES | 8                                |
| DUMMY | 1                                |
| FREQU | 7992.01 Hz                       |
| FLT   | 4000 Hz                          |
| DELAY | 50.00 usec                       |
| ACQTM | 2.0501 sec                       |
| PD    | 4.9500 sec                       |
| ADBIT | 16                               |
| RGAIN | 18                               |
| BF    | 0.10 Hz                          |
| T1    | 0.00                             |
| T2    | 0.00                             |
| T3    | 90.00                            |
| T4    | 100.00                           |
| EXMOD | NON                              |
| EXPCM | NON:Single.coupled:PW1_ACQTM_PD: |
| IRNUC | 1H                               |
| IFR   | 399.65 MHz                       |
| IRSET | 136.90 KHz                       |
| IRFIN | 97.50 Hz                         |
| IRRPW | 45 usec                          |
| IRATN | 511                              |
| DFILE | _DEFAULT.ALS                     |
| SF    | TH5ATFG2                         |
| LKSET | 61.60 KHz                        |
| LKFIN | 79.0 Hz                          |
| LKLEV | 180                              |
| LGAIN | 25                               |
| LKPHS | 219                              |
| LKSIG | 1545                             |
| CSPED | 13 Hz                            |
| FILDC |                                  |
| FILDF |                                  |

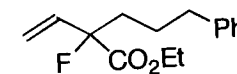

auto

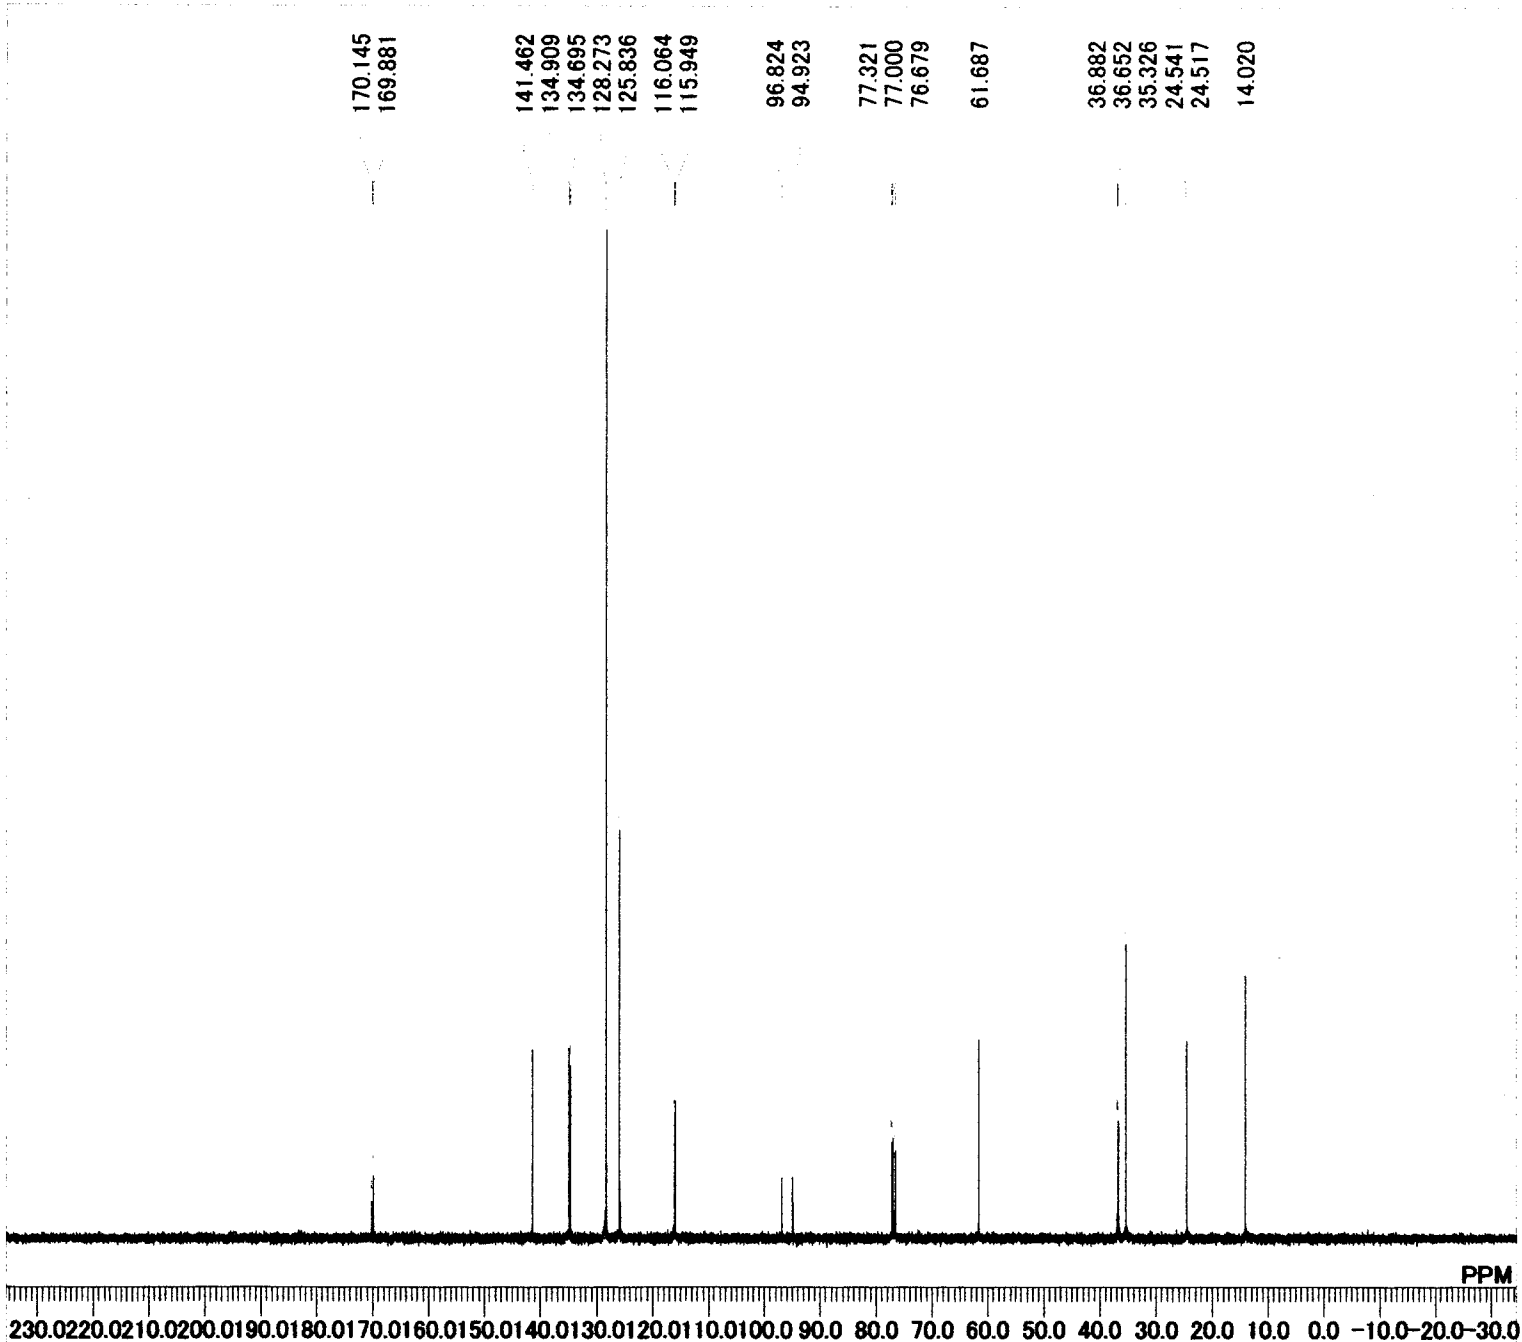

MENUF 13C  
OBNUC 13C  
OFR 100.40 MHz  
OBSET 125.00 KHz  
OBFIN 10500.00 Hz  
PW1 6.00 usec  
DEADT 19.10 usec  
PREDL 0.20000 msec  
IWT 1.0000 msec  
POINT 32768  
SPO 32768  
TIMES 256  
DUMMY 1  
FREQU 27118.64 Hz  
FLT 13550 Hz  
DELAY 14.80 usec  
ACQTM 1.2083 sec  
PD 1.7920 sec  
ADBIT 16  
RGAIN 25  
BF 0.10 Hz  
T1 0.00  
T2 0.00  
T3 90.00  
T4 100.00  
EXMOD BCM  
EXPCM Bilevel.complete.decoupling.Set\_IRRP1  
IRNUC 1H  
IFR 399.65 MHz  
IRSET 124.00 KHz  
IRFIN 10500.00 Hz  
IRRPW 45 usec  
IRATN 511  
DFILE 08925 Sn2' R=CO2Et with phenylprop  
SF TH5ATFG2  
LKSET 61.60 KHz  
LKFIN 79.0 Hz  
LKLEV 180  
LGAIN 26  
LKPHS 211  
LKSIG 886  
CSPED 13 Hz  
FILDC  
FILDF

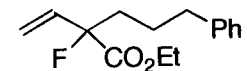

auto

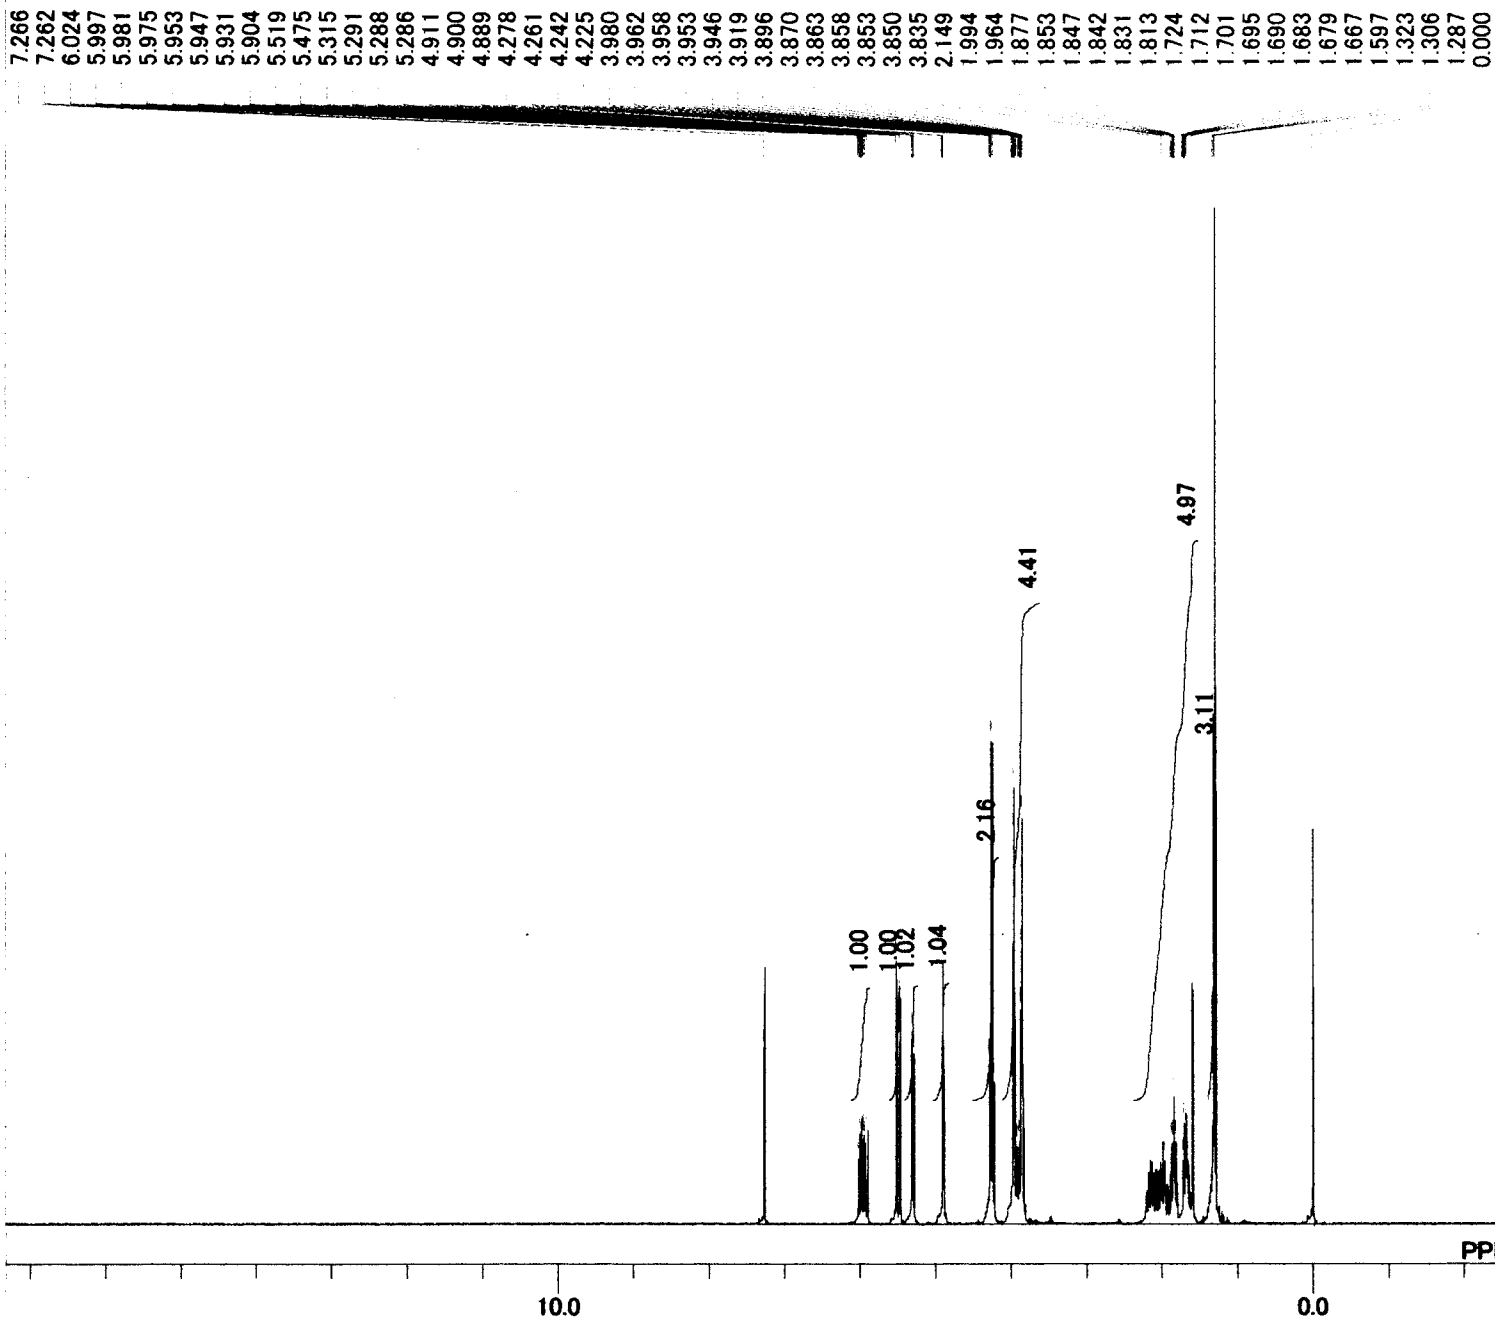

|       |                                  |
|-------|----------------------------------|
| MENUF | 1H                               |
| OBNUC | 1H                               |
| OFR   | 399.65 MHz                       |
| OBSET | 135.40 KHz                       |
| OBFIN | 24.90 Hz                         |
| PW1   | 5.20 usec                        |
| DEADT | 72.40 usec                       |
| PREDL | 0.20000 msec                     |
| IWT   | 1.0000 msec                      |
| POINT | 16384                            |
| SPO   | 16384                            |
| TIMES | 8                                |
| DUMMY | 1                                |
| FREQU | 7992.01 Hz                       |
| FLT   | 4000 Hz                          |
| DELAY | 50.00 usec                       |
| ACQTM | 2.0501 sec                       |
| PD    | 4.9500 sec                       |
| ADBIT | 16                               |
| RGAIN | 16                               |
| BF    | 0.10 Hz                          |
| T1    | 0.00                             |
| T2    | 0.00                             |
| T3    | 90.00                            |
| T4    | 100.00                           |
| EXMOD | NON                              |
| EXPCM | NON:Single.coupled:PW1_ACQTM_PD: |
| IRNUC | 1H                               |
| IFR   | 399.65 MHz                       |
| IRSET | 136.90 KHz                       |
| IRFIN | 97.50 Hz                         |
| IRRPW | 45 usec                          |
| IRATN | 511                              |
| DFILE | _DEFAULT.ALS                     |
| SF    | TH5ATFG2                         |
| LKSET | 61.60 KHz                        |
| LKFIN | 79.0 Hz                          |
| LKLEV | 180                              |
| LGAIN | 24                               |
| LKPHS | 211                              |
| LKSIG | 818                              |
| CSPED | 13 Hz                            |
| FILDC |                                  |
| FILDF |                                  |

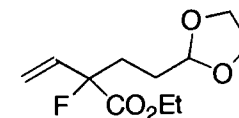

auto

15.941  
15.686  
-19.413  
-19.627  
-37.547  
-37.654  
-50.577  
-57.664  
-59.566  
-76.679  
-77.000  
-77.313  
-89.125  
-92.220  
-122.668  
-122.890  
-126.743  
-126.767  
-139.962

MENUF 13C  
OBNUC 13C  
OFR 100.40 MHz  
OBSET 125.00 KHz  
OBFIN 10500.00 Hz  
PW1 6.00 usec  
DEADT 19.10 usec  
PREDL 0.20000 msec  
IWT 1.0000 msec  
POINT 32768  
SPO 32768  
TIMES 256  
DUMMY 1  
FREQU 27118.64 Hz  
FLT 13550 Hz  
DELAY 14.80 usec  
ACQTM 1.2083 sec  
PD 1.7920 sec  
ADBIT 16  
RGAIN 25  
BF 0.10 Hz  
T1 0.00  
T2 0.00  
T3 90.00  
T4 100.00  
EXMOD BCM  
EXPCM Bilevel.complete.decoupling.Set\_IRRP1  
IRNUC 1H  
IFR 399.65 MHz  
IRSET 124.00 KHz  
IRFIN 10500.00 Hz  
IRRPW 45 usec  
IRATN 511  
DFILE \_DEFAULT.ALS  
SF TH5ATFG2  
LKSET 61.60 KHz  
LKFIN 79.0 Hz  
LKLEV 180  
LGAIN 24  
LKPHS 211  
LKSIG 646  
CSPED 14 Hz  
FILDC  
FILDF

PPM

80.0 70.0 60.0 50.0 40.0 30.0 20.0 10.0 0.0 -10.0 -20.0 -30.0 -40.0 -50.0 -60.0 -70.0 -80.0 -90.0 -100.0 110.0 120.0 130.0 140.0 150.0 160.0 170.0 180.0

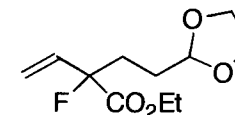

auto

7.265  
6.026  
5.999  
5.984  
5.978  
5.956  
5.949  
5.934  
5.907  
5.818  
5.792  
5.775  
5.749  
5.499  
5.456  
5.287  
5.264  
5.261  
5.259  
5.021  
5.016  
4.977  
4.973  
4.959  
4.956  
4.933  
4.931  
4.279  
4.262  
4.244  
4.227  
2.078  
2.061  
2.043  
2.025  
2.016  
2.003  
1.579  
1.528  
1.509  
1.498  
1.491  
1.479  
1.463  
1.442  
1.424  
1.406  
1.387  
1.369  
1.352  
1.341  
1.325  
1.318  
1.308  
1.290  
1.276  
1.264  
0.000

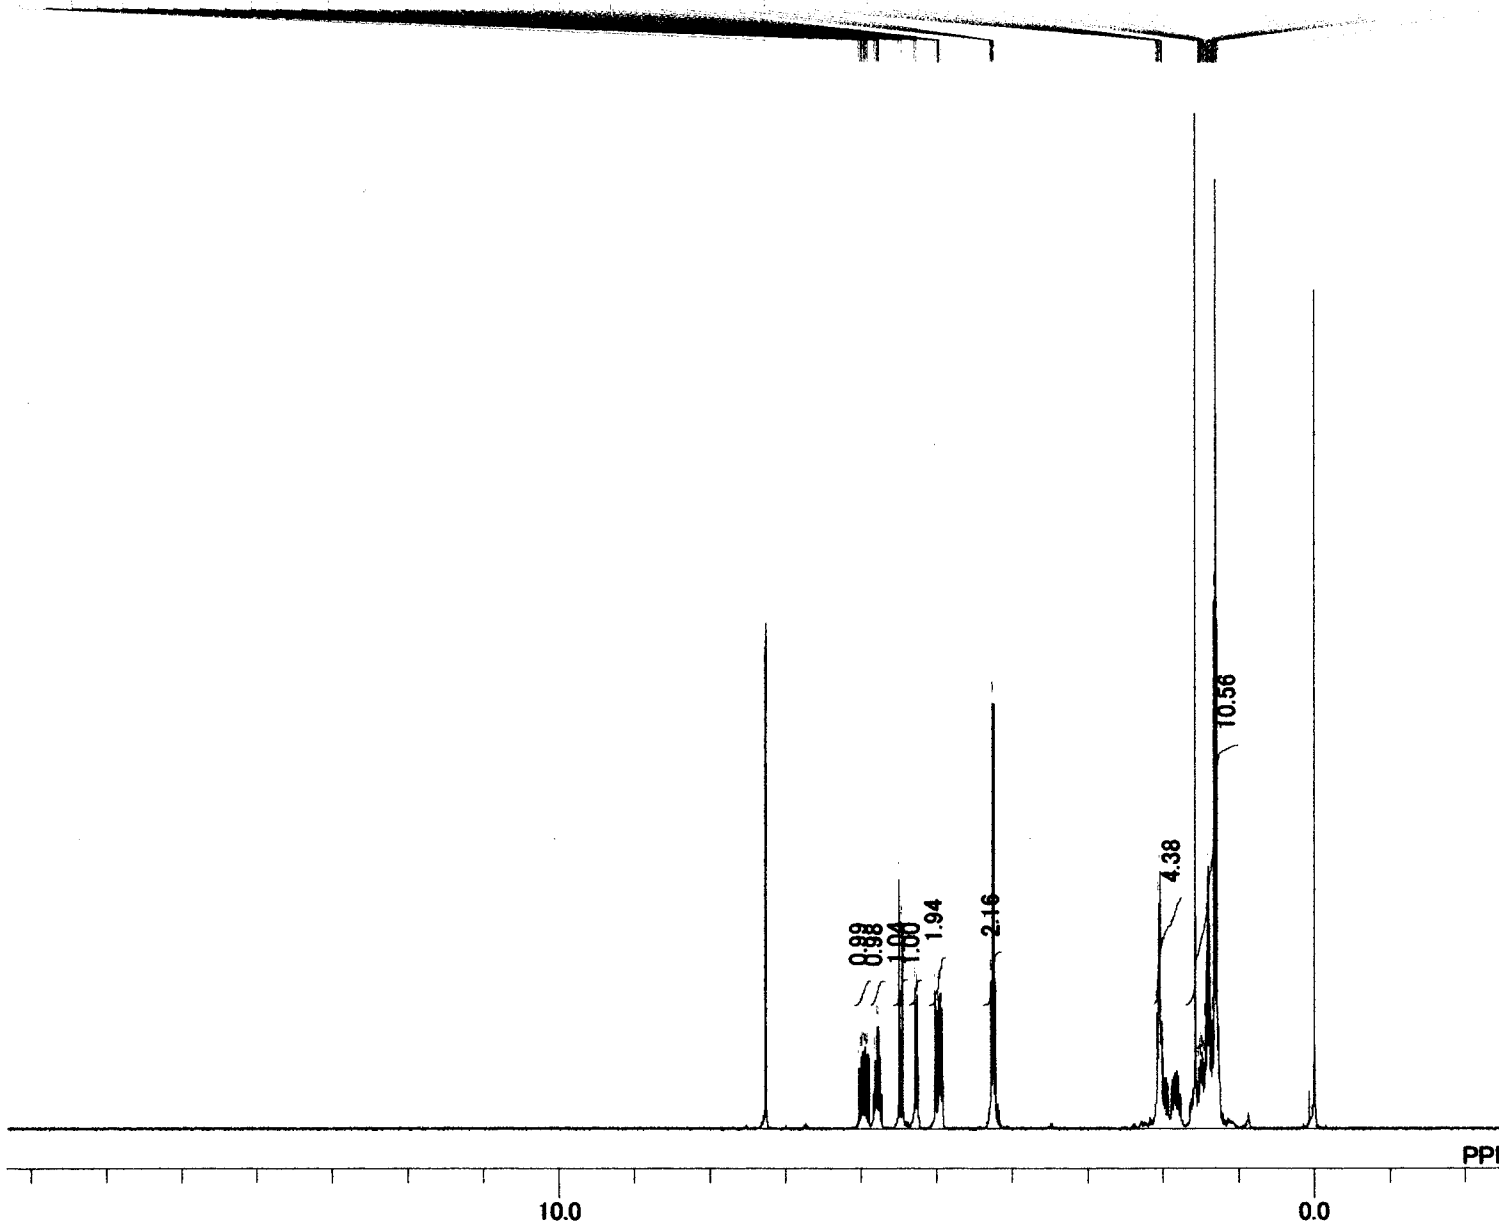

MENUF 1H  
OBNUC 1H  
OFR 399.85 MHz  
OBSET 135.40 KHz  
OBFIN 24.90 Hz  
PW1 5.20 usec  
DEADT 72.40 usec  
PREDL 0.20000 msec  
IWT 1.0000 msec  
POINT 16384  
SPO 16384  
TIMES 8  
DUMMY 1  
FREQU 7992.01 Hz  
FLT 4000 Hz  
DELAY 50.00 usec  
ACQTM 2.0501 sec  
PD 4.9500 sec  
ADBIT 16  
RGAIN 17  
BF 0.10 Hz  
T1 0.00  
T2 0.00  
T3 90.00  
T4 100.00  
EXMOD NON  
EXPCM NON:Single.coupled:PW1\_ACQTM\_PD:  
IRNUC 1H  
IFR 399.65 MHz  
IRSET 136.90 KHz  
IRFIN 97.50 Hz  
IRRPW 45 usec  
IRATN 511  
DFILE 08925 Sn2' R=CO2Et with hexene (H)  
SF TH5ATFG2  
LKSET 61.60 KHz  
LKFIN 79.0 Hz  
LKLEV 180  
LGAIN 22  
LKPHS 219  
LKSIG 592  
CSPED 13 Hz  
FILDC  
FILDF

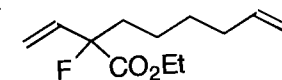

auto

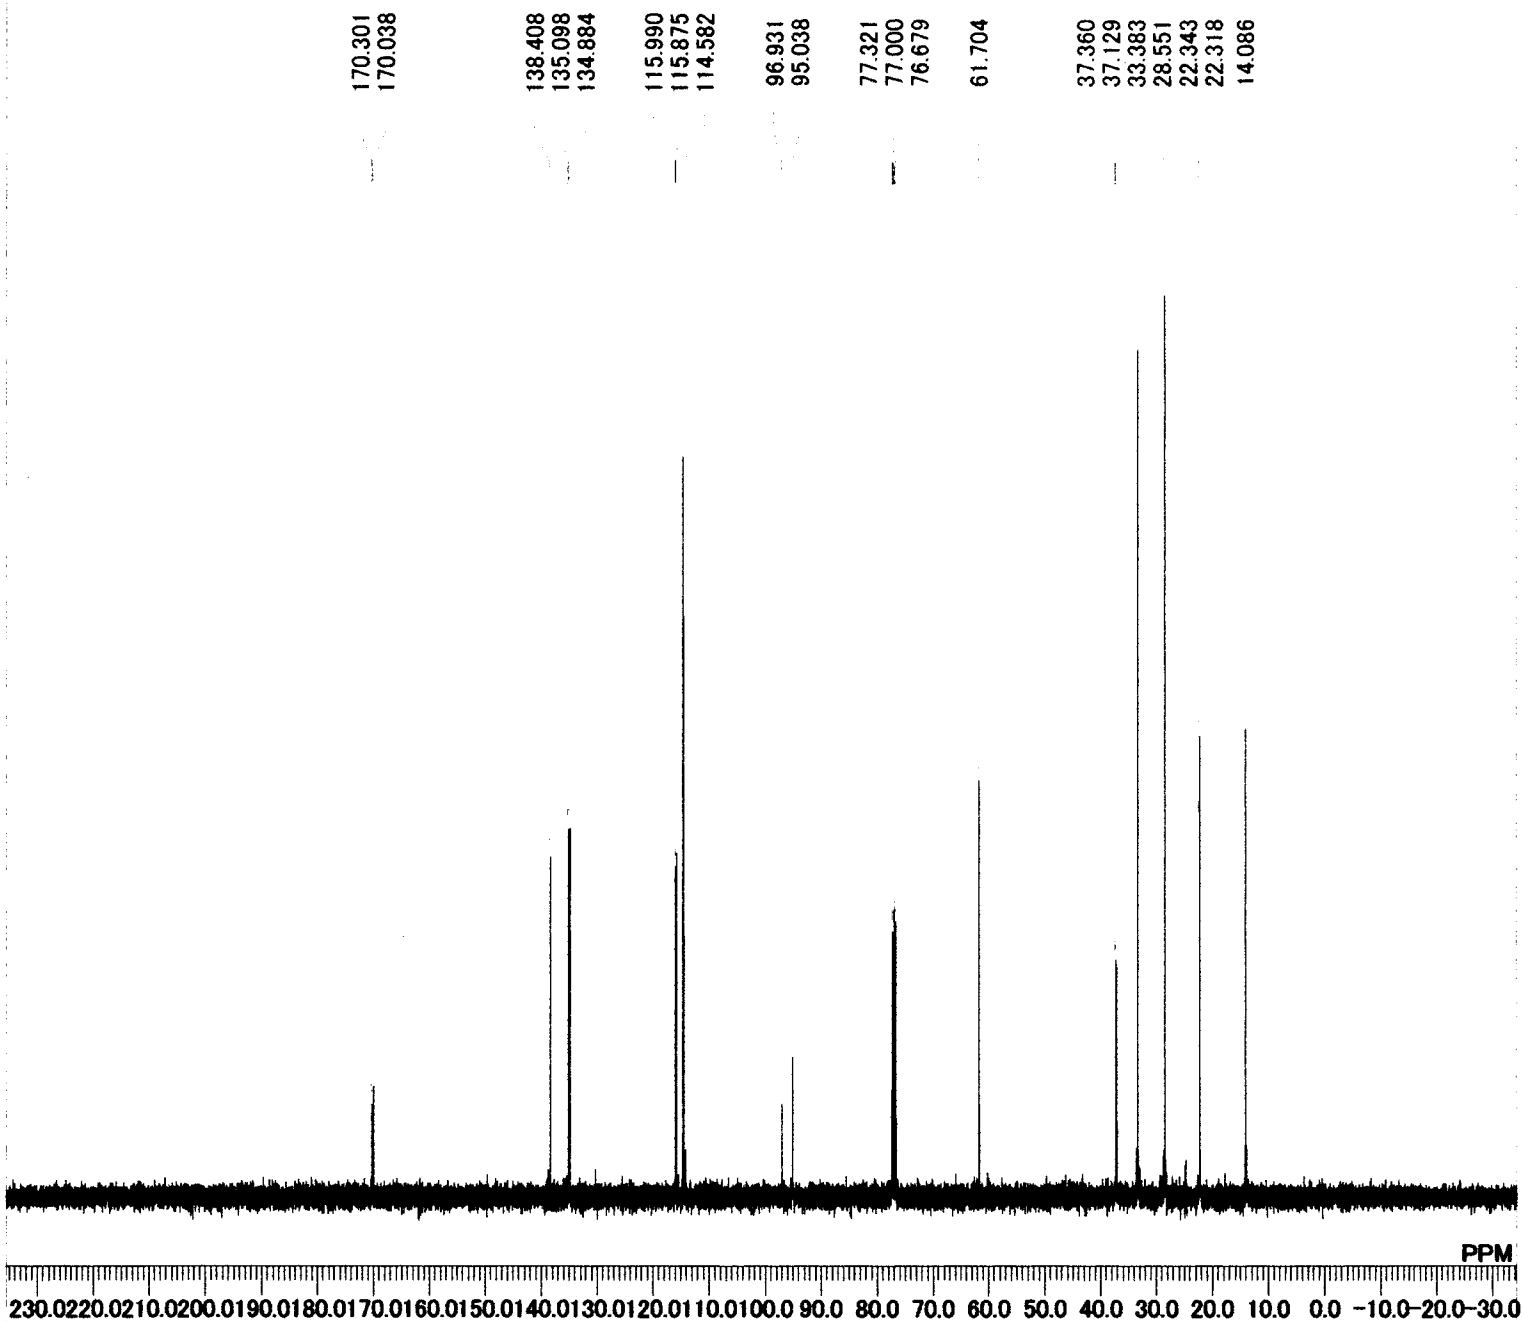

|       |                                       |
|-------|---------------------------------------|
| MENUF | 13C                                   |
| OBNUC | 13C                                   |
| OFR   | 100.40 MHz                            |
| OBSET | 125.00 KHz                            |
| OBFIN | 10500.00 Hz                           |
| PW1   | 6.00 usec                             |
| DEADT | 19.10 usec                            |
| PREDL | 0.20000 msec                          |
| IWT   | 1.0000 msec                           |
| POINT | 32768                                 |
| SPO   | 32768                                 |
| TIMES | 256                                   |
| DUMMY | 1                                     |
| FREQU | 27118.64 Hz                           |
| FLT   | 13550 Hz                              |
| DELAY | 14.80 usec                            |
| ACQTM | 1.2083 sec                            |
| PD    | 1.7920 sec                            |
| ADBIT | 16                                    |
| RGAIN | 25                                    |
| BF    | 0.10 Hz                               |
| T1    | 0.00                                  |
| T2    | 0.00                                  |
| T3    | 90.00                                 |
| T4    | 100.00                                |
| EXMOD | BCM                                   |
| EXPCM | Bilevel.complete.decoupling:Set_IRRP1 |
| IRNUC | 1H                                    |
| IFR   | 399.65 MHz                            |
| IRSET | 124.00 KHz                            |
| IRFIN | 10500.00 Hz                           |
| IRRPW | 45 usec                               |
| IRATN | 511                                   |
| DFILE | _DEFAULT.ALS                          |
| SF    | TH5ATFG2                              |
| LKSET | 61.60 KHz                             |
| LKFIN | 79.0 Hz                               |
| LKLEV | 180                                   |
| LGAIN | 23                                    |
| LKPHS | 211                                   |
| LKSIG | 503                                   |
| CSPED | 12 Hz                                 |
| FILDC |                                       |
| FILDF |                                       |

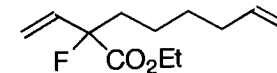



auto

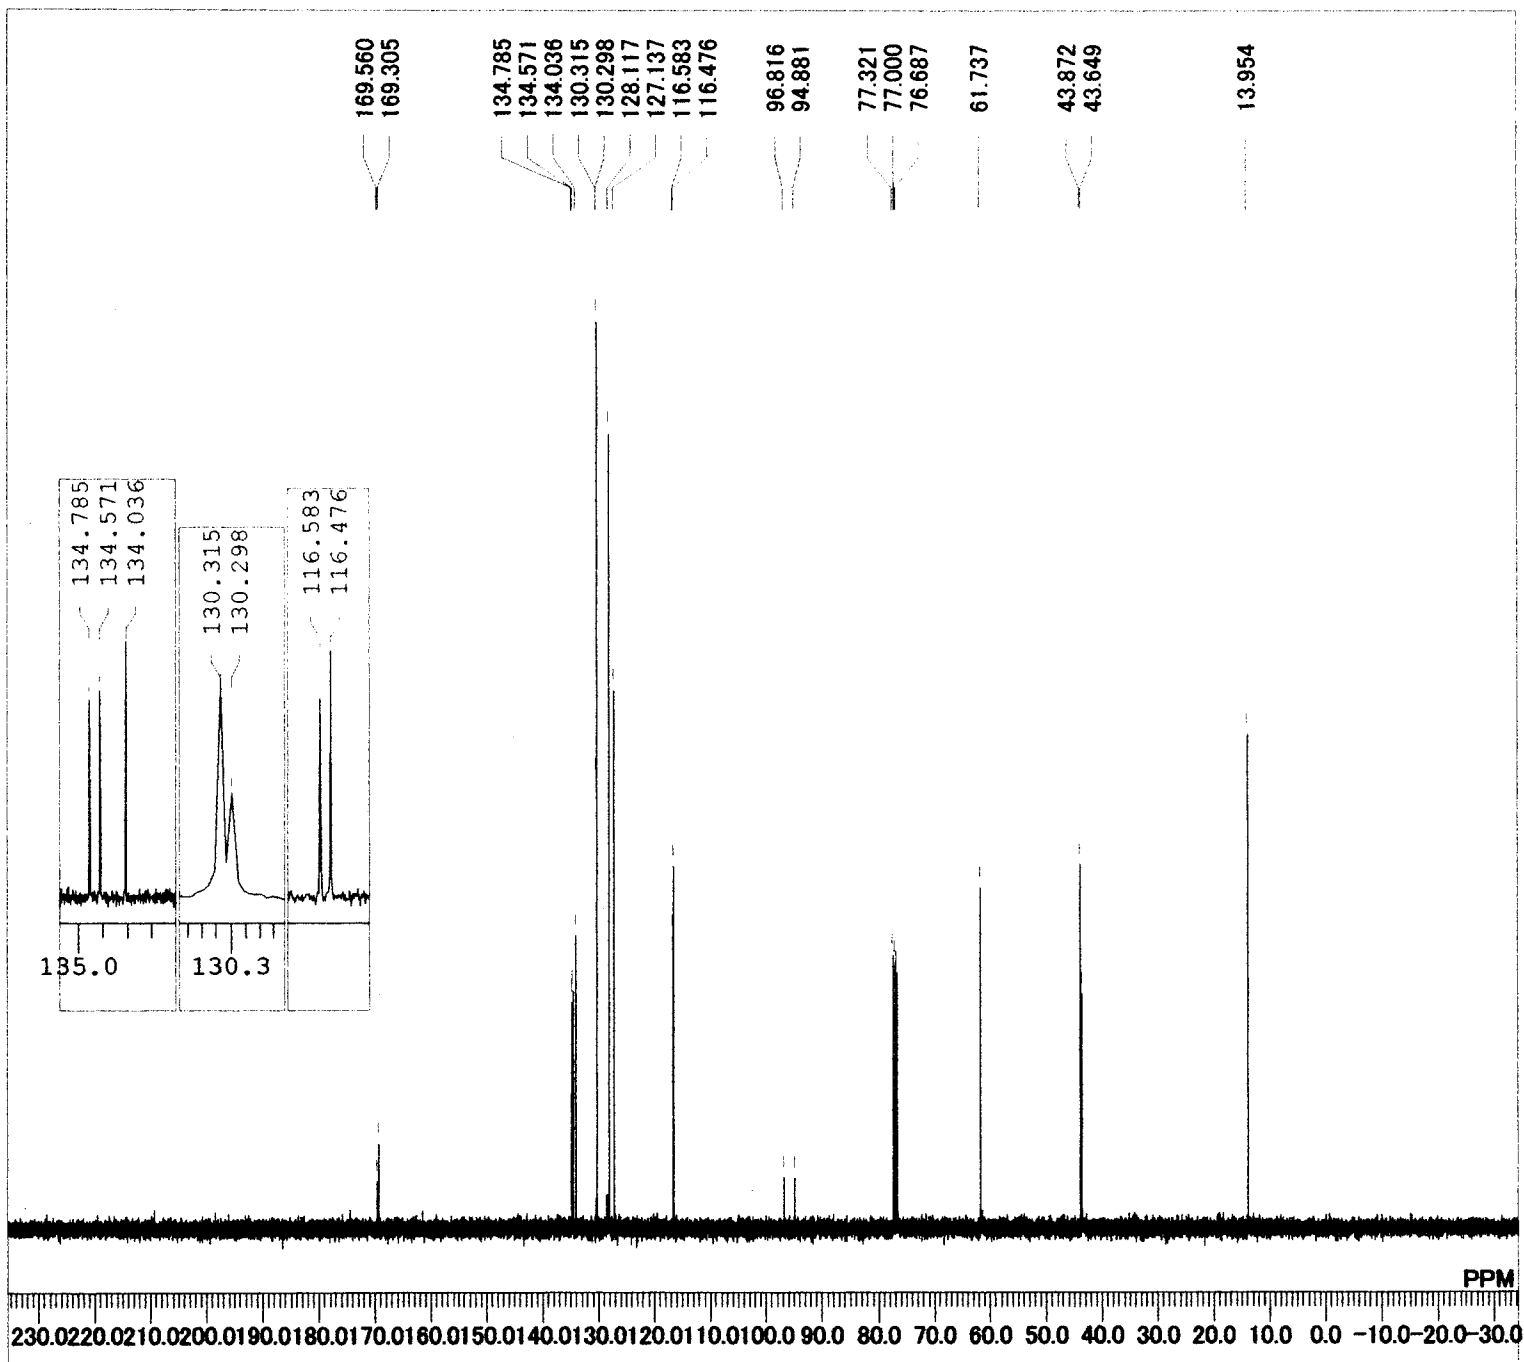

|       |                                       |
|-------|---------------------------------------|
| MENUF | 13C                                   |
| OBNUC | 13C                                   |
| OFR   | 100.40 MHz                            |
| OBSET | 125.00 KHz                            |
| OBFIN | 10500.00 Hz                           |
| PW1   | 6.00 usec                             |
| DEADT | 19.10 usec                            |
| PREDL | 0.20000 msec                          |
| IWT   | 1.0000 msec                           |
| POINT | 32768                                 |
| SPO   | 32768                                 |
| TIMES | 256                                   |
| DUMMY | 1                                     |
| FREQU | 27118.64 Hz                           |
| FLT   | 13550 Hz                              |
| DELAY | 14.80 usec                            |
| ACQTM | 1.2083 sec                            |
| PD    | 1.7920 sec                            |
| ADBIT | 16                                    |
| RGAIN | 25                                    |
| BF    | 0.10 Hz                               |
| T1    | 0.00                                  |
| T2    | 0.00                                  |
| T3    | 90.00                                 |
| T4    | 100.00                                |
| EXMOD | BCM                                   |
| EXPCM | Bilevel.complete.decoupling.Set_IRRP1 |
| IRNUC | 1H                                    |
| IFR   | 399.65 MHz                            |
| IRSET | 124.00 KHz                            |
| IRFIN | 10500.00 Hz                           |
| IRRPW | 45 usec                               |
| IRATN | 511                                   |
| DFILE | 081110 Sn2' R=CO2Et with BnMgCl (     |
| SF    | TH5ATFG2                              |
| LKSET | 61.60 KHz                             |
| LKFIN | 79.0 Hz                               |
| LKLEV | 180                                   |
| LGAIN | 24                                    |
| LKPHS | 231                                   |
| LKSIG | 1282                                  |
| CSPED | 12 Hz                                 |
| FILDC |                                       |
| FILDF |                                       |

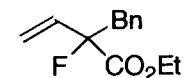



auto

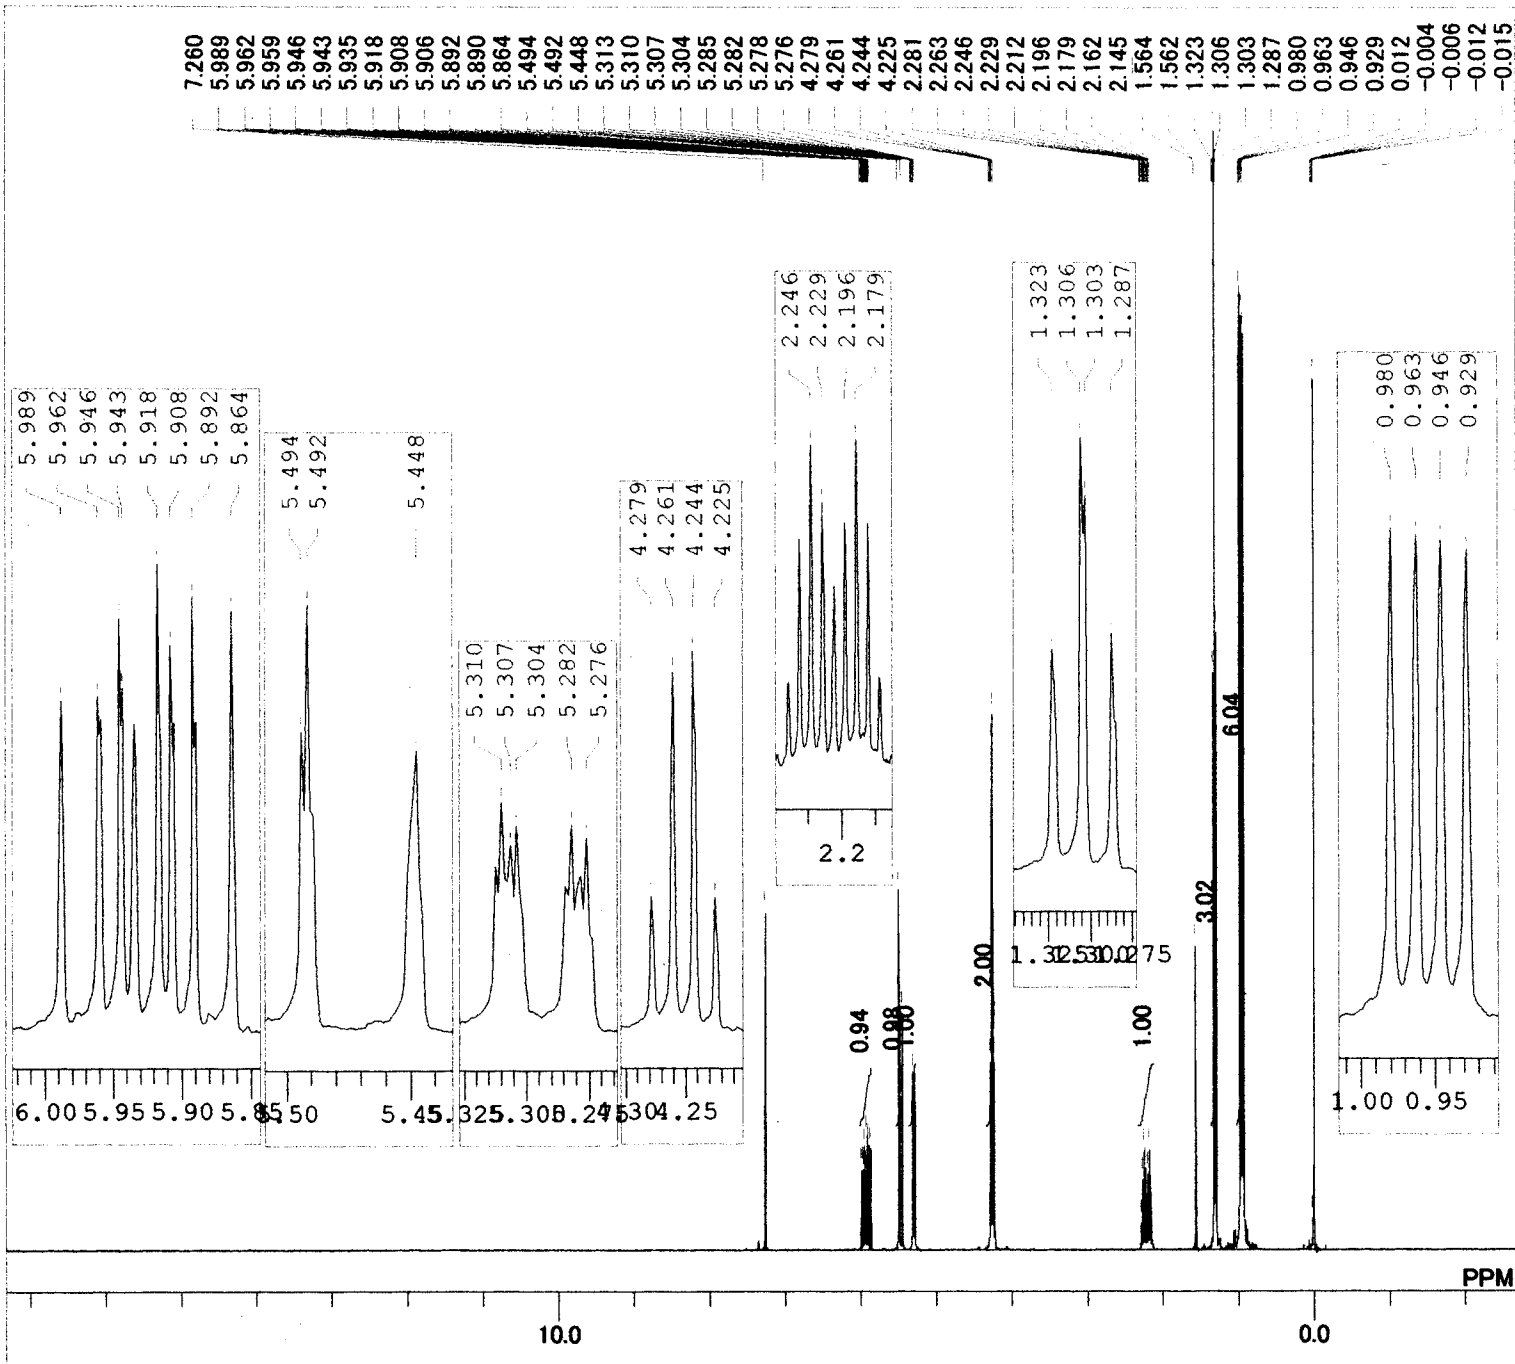

|       |                                      |
|-------|--------------------------------------|
| MENUF | 1H                                   |
| OBNUC | 1H                                   |
| OFR   | 399.65 MHz                           |
| OBSET | 135.40 KHz                           |
| OBFIN | 24.90 Hz                             |
| PW1   | 5.20 usec                            |
| DEADT | 72.40 usec                           |
| PREDL | 0.20000 msec                         |
| IWT   | 1.0000 msec                          |
| POINT | 16384                                |
| SPO   | 16384                                |
| TIMES | 8                                    |
| DUMMY | 1                                    |
| FREQU | 7992.01 Hz                           |
| FLT   | 4000 Hz                              |
| DELAY | 50.00 usec                           |
| ACQTM | 2.0501 sec                           |
| PD    | 4.9500 sec                           |
| ADBIT | 16                                   |
| RGAIN | 16                                   |
| BF    | 0.10 Hz                              |
| T1    | 0.00                                 |
| T2    | 0.00                                 |
| T3    | 100.00                               |
| T4    | 100.00                               |
| EXMOD | NON                                  |
| EXPCM | NON:Single.coupled:PW1_ACQTM_PD:     |
| IRNUC | 1H                                   |
| IFR   | 399.65 MHz                           |
| IRSET | 136.90 KHz                           |
| IRFIN | 97.50 Hz                             |
| IRRPW | 45 usec                              |
| IRATN | 511                                  |
| DFILE | 08226 Sn2' R=CO2Et with isop (H).al: |
| SF    | TH5ATFG2                             |
| LKSET | 61.60 KHz                            |
| LKFIN | 79.0 Hz                              |
| LKLEV | 180                                  |
| LGAIN | 24                                   |
| LKPHS | 219                                  |
| LKSIG | 1162                                 |
| CSPED | 12 Hz                                |
| FILDC |                                      |
| FILDF |                                      |

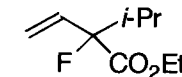

auto

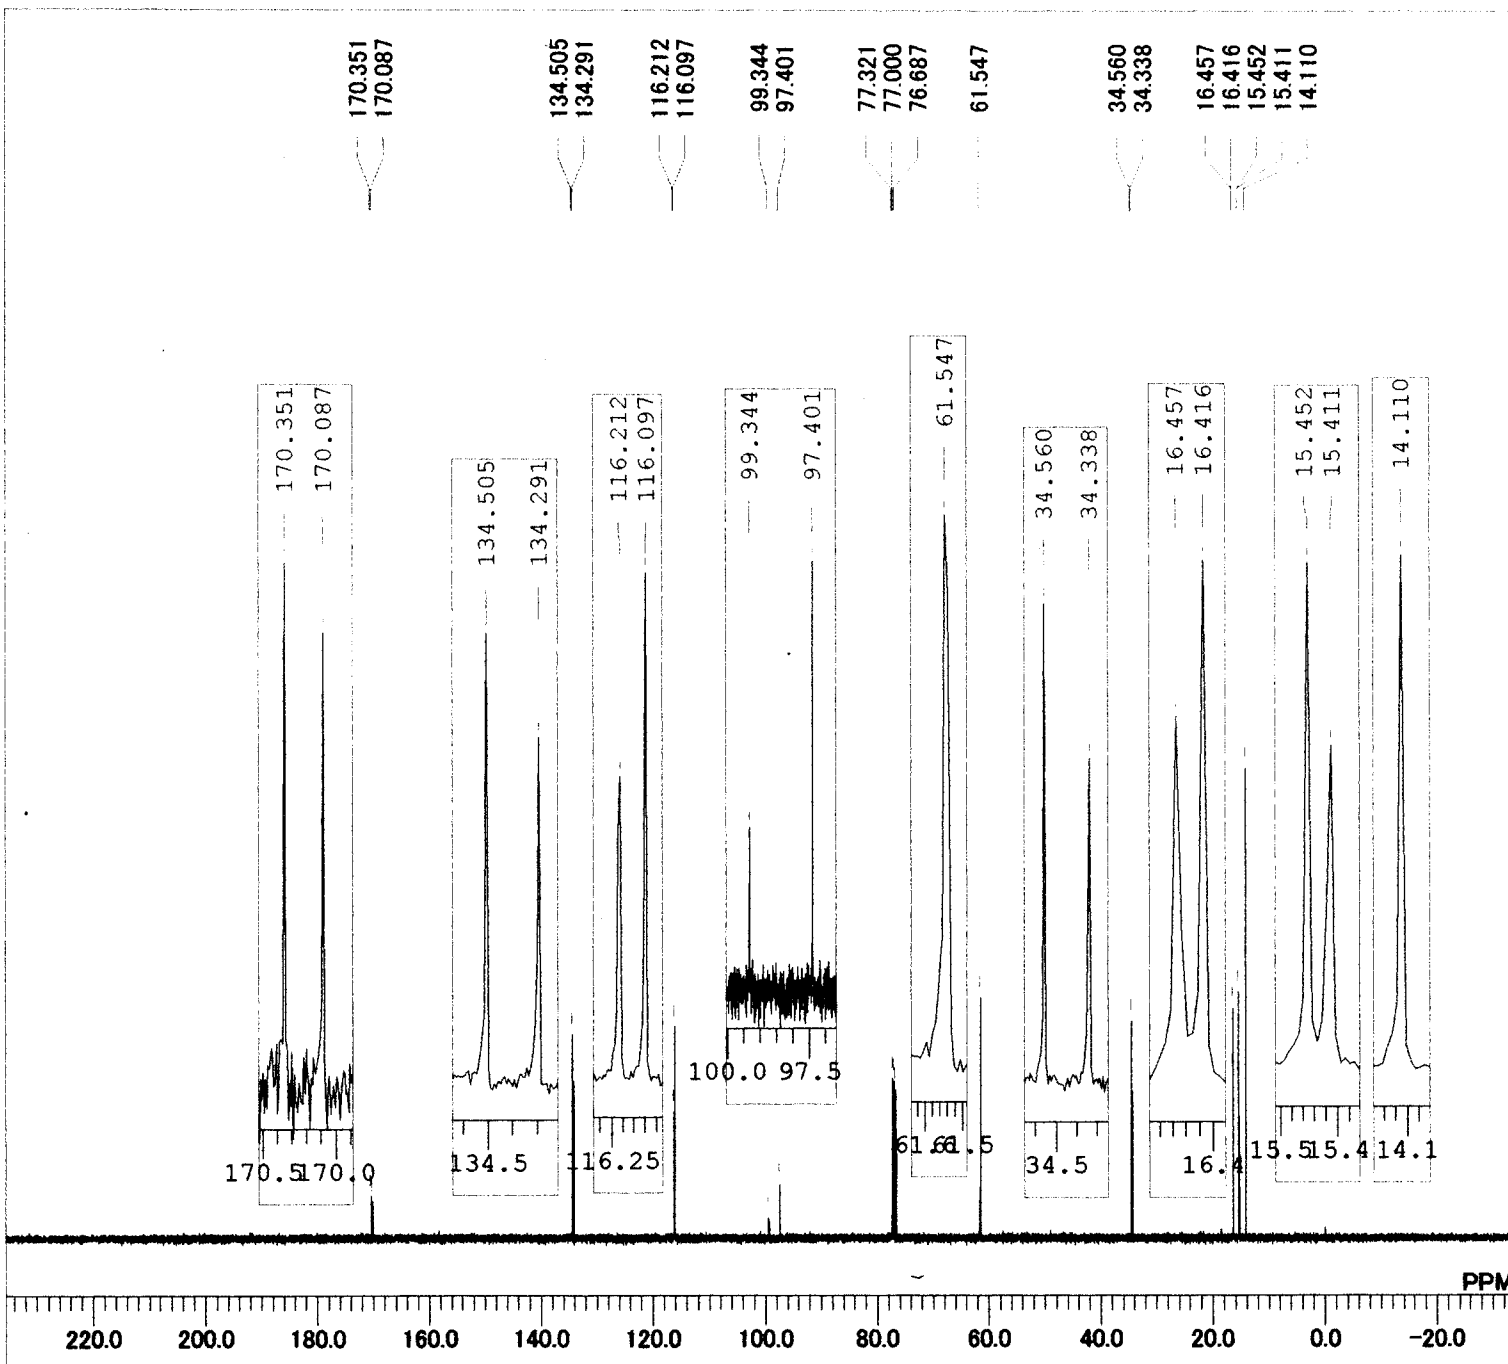

|       |                                       |
|-------|---------------------------------------|
| MENUF | 13C                                   |
| OBNUC | 13C                                   |
| OFR   | 100.40 MHz                            |
| OBSET | 125.00 KHz                            |
| OBFIN | 10500.00 Hz                           |
| PW1   | 6.00 usec                             |
| DEADT | 19.10 usec                            |
| PREDL | 0.20000 msec                          |
| IWT   | 1.0000 msec                           |
| POINT | 32768                                 |
| SPO   | 32768                                 |
| TIMES | 256                                   |
| DUMMY | 1                                     |
| FREQU | 27118.64 Hz                           |
| FLT   | 13550 Hz                              |
| DELAY | 14.80 usec                            |
| ACQTM | 1.2083 sec                            |
| PD    | 1.7920 sec                            |
| ADBIT | 16                                    |
| RGAIN | 26                                    |
| BF    | 0.10 Hz                               |
| T1    | 0.00                                  |
| T2    | 0.00                                  |
| T3    | 100.00                                |
| T4    | 100.00                                |
| EXMOD | BCM                                   |
| EXPCM | Bilevel.complete.decoupling:Set_IRRP1 |
| IRNUC | 1H                                    |
| IFR   | 399.65 MHz                            |
| IRSET | 124.00 KHz                            |
| IRFIN | 10500.00 Hz                           |
| IRRPW | 45 usec                               |
| IRATN | 511                                   |
| DFILE | 08226 Sn2' R=CO2Et with isop (C).al:  |
| SF    | TH5ATFG2                              |
| LKSET | 61.60 KHz                             |
| LKFIN | 79.0 Hz                               |
| LKLEV | 180                                   |
| LGAIN | 23                                    |
| LKPHS | 219                                   |
| LKSIG | 667                                   |
| CSPED | 11 Hz                                 |
| FILDC |                                       |
| FILDF |                                       |

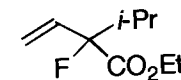

auto

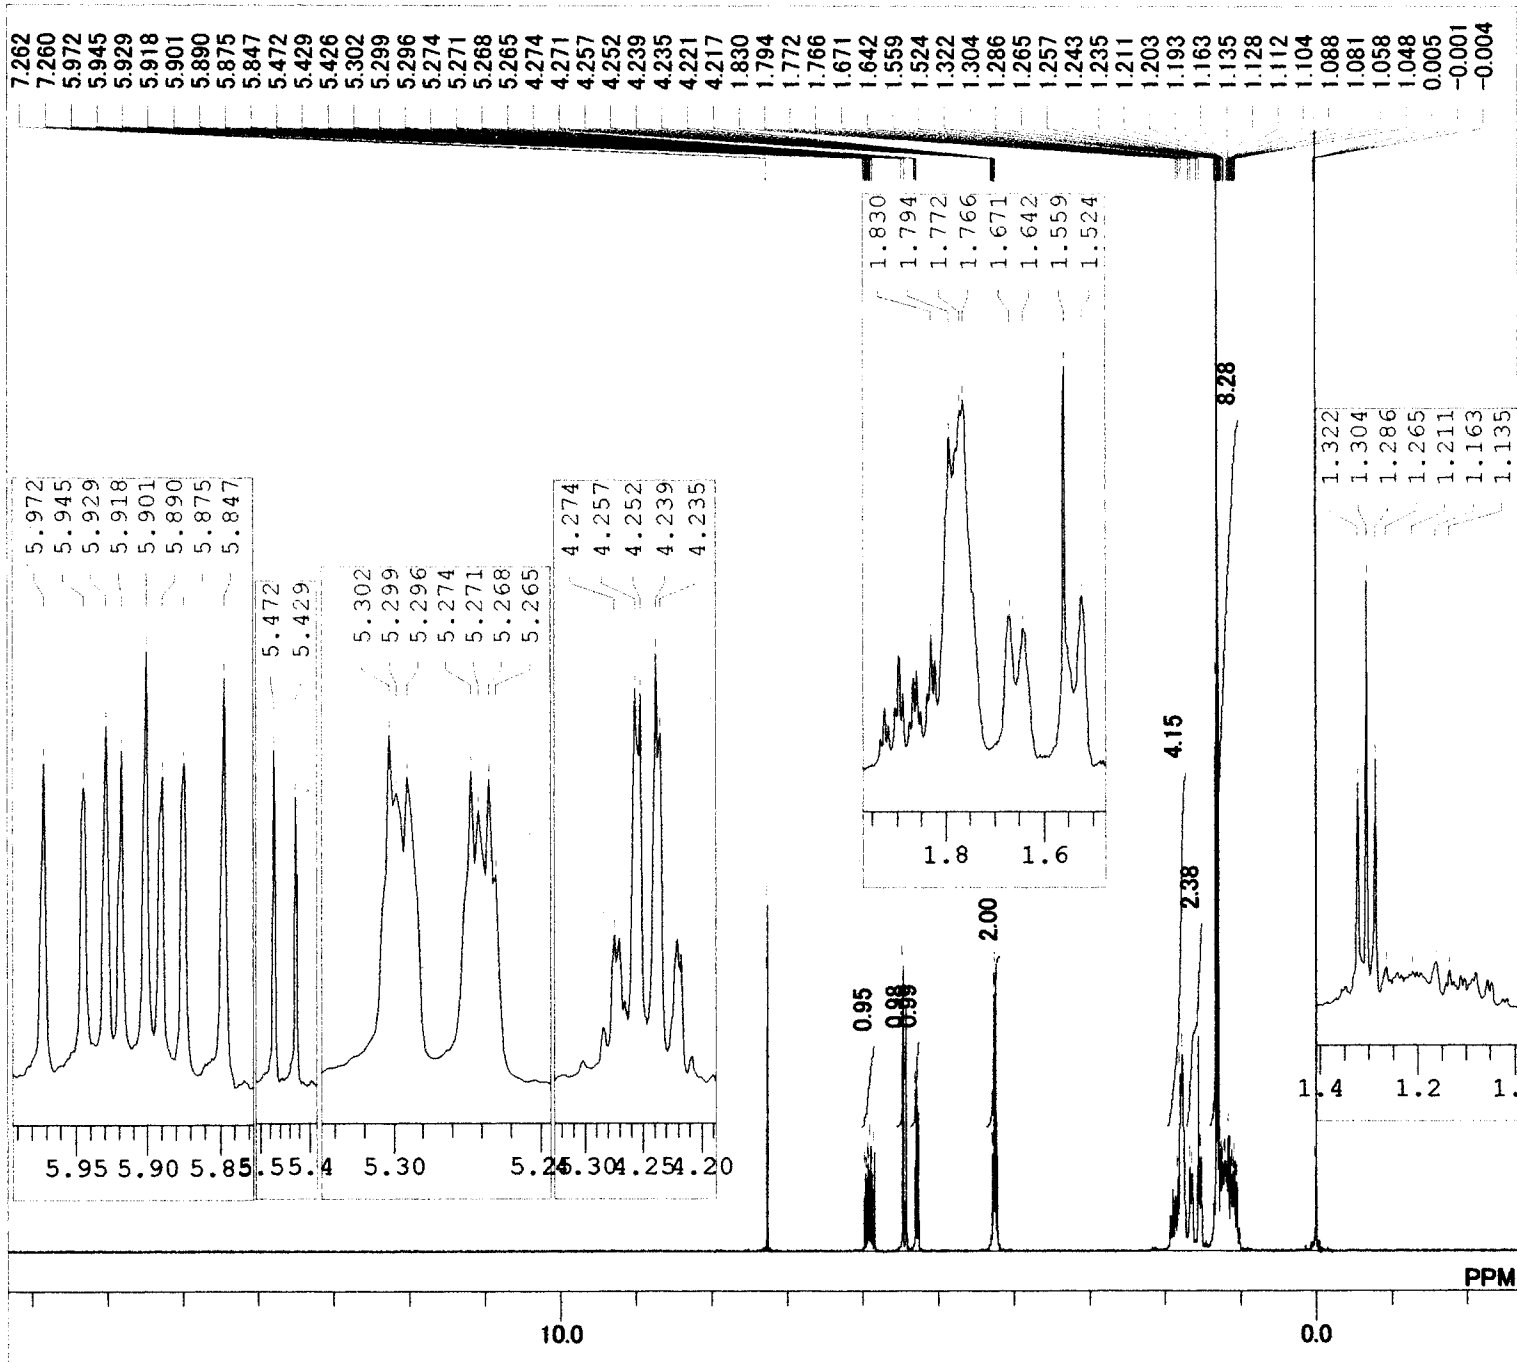

|       |                                    |
|-------|------------------------------------|
| MENUF | 1H                                 |
| OBNUC | 1H                                 |
| OFR   | 399.65 MHz                         |
| OBSET | 135.40 KHz                         |
| OBFIN | 24.90 Hz                           |
| PW1   | 5.20 usec                          |
| DEADT | 72.40 usec                         |
| PREDL | 0.20000 msec                       |
| IWT   | 1.0000 msec                        |
| POINT | 16384                              |
| SPO   | 16384                              |
| TIMES | 8                                  |
| DUMMY | 1                                  |
| FREQU | 7992.01 Hz                         |
| FLT   | 4000 Hz                            |
| DELAY | 50.00 usec                         |
| ACQTM | 2.0501 sec                         |
| PD    | 4.9500 sec                         |
| ADBIT | 16                                 |
| RGAIN | 17                                 |
| BF    | 0.10 Hz                            |
| T1    | 0.00                               |
| T2    | 0.00                               |
| T3    | 100.00                             |
| T4    | 100.00                             |
| EXMOD | NON                                |
| EXPCM | NON:Single.coupled:PW1_ACQTM_PD:   |
| IRNUC | 1H                                 |
| IFR   | 399.65 MHz                         |
| IRSET | 136.90 KHz                         |
| IRFIN | 97.50 Hz                           |
| IRRPW | 45 usec                            |
| IRATN | 511                                |
| DFILE | 08225 Sn2' R=CO2Et with Cy (H).als |
| SF    | TH5ATFG2                           |
| LKSET | 61.60 KHz                          |
| LKFIN | 79.0 Hz                            |
| LKLEV | 180                                |
| LGAIN | 26                                 |
| LKPHS | 219                                |
| LKSIG | 1627                               |
| CSPED | 13 Hz                              |
| FILDC |                                    |
| FILDF |                                    |

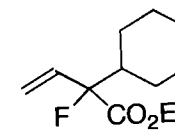

auto

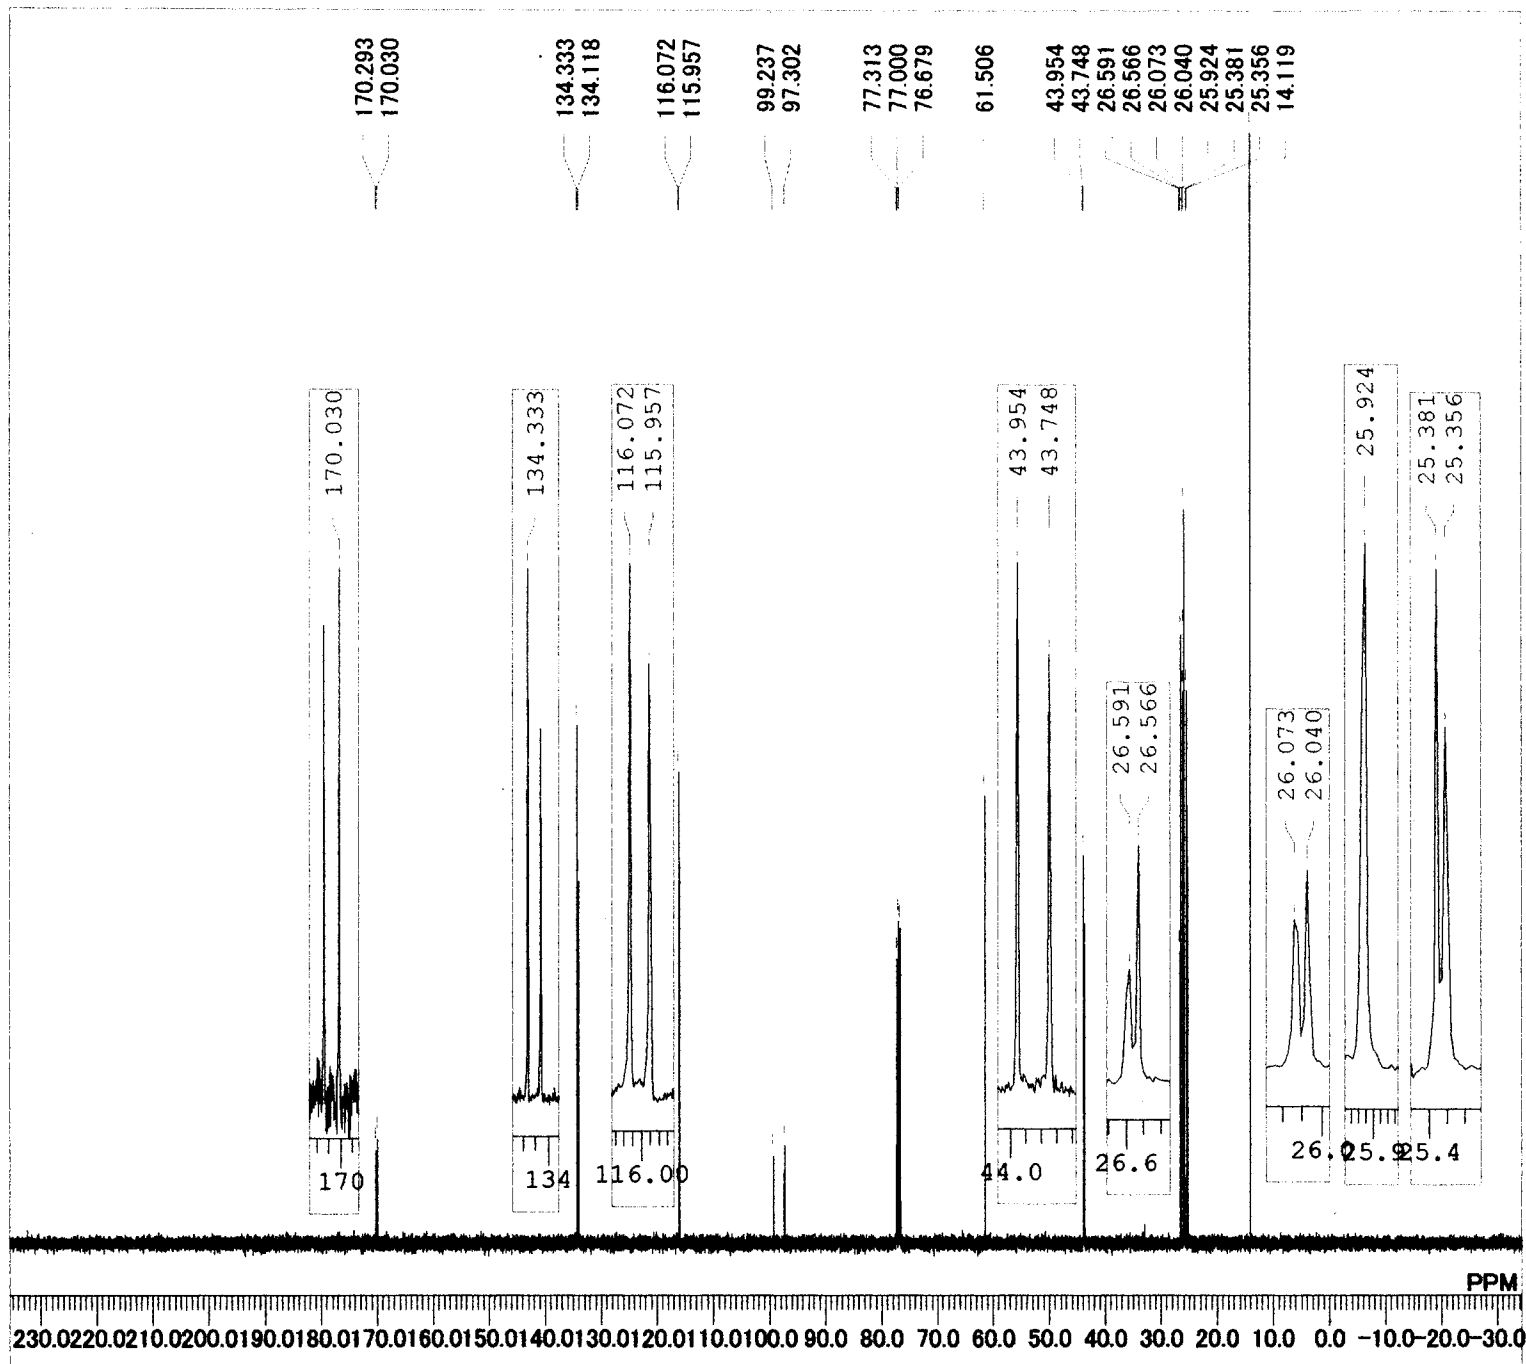

|       |                                       |
|-------|---------------------------------------|
| MENUF | 13C                                   |
| OBNUC | 13C                                   |
| OFR   | 100.40 MHz                            |
| OBSET | 125.00 KHz                            |
| OBFIN | 10500.00 Hz                           |
| PW1   | 6.00 usec                             |
| DEADT | 19.10 usec                            |
| PREDL | 0.20000 msec                          |
| IWT   | 1.0000 msec                           |
| POINT | 32768                                 |
| SPO   | 32768                                 |
| TIMES | 256                                   |
| DUMMY | 1                                     |
| FREQU | 27118.64 Hz                           |
| FLT   | 13550 Hz                              |
| DELAY | 14.80 usec                            |
| ACQTM | 1.2083 sec                            |
| PD    | 1.7920 sec                            |
| ADBIT | 16                                    |
| RGAIN | 26                                    |
| BF    | 0.10 Hz                               |
| T1    | 0.00                                  |
| T2    | 0.00                                  |
| T3    | 100.00                                |
| T4    | 100.00                                |
| EXMOD | BCM                                   |
| EXPCM | Bilevel.complete.decoupling:Set_IRRP1 |
| IRNUC | 1H                                    |
| IFR   | 399.65 MHz                            |
| IRSET | 124.00 KHz                            |
| IRFIN | 10500.00 Hz                           |
| IRRPW | 45 usec                               |
| IRATN | 511                                   |
| DFILE | 08225 Sn2' R=CO2Et with Cy (C).als    |
| SF    | TH5ATFG2                              |
| LKSET | 61.60 KHz                             |
| LKFIN | 79.0 Hz                               |
| LKLEV | 180                                   |
| LGAIN | 23                                    |
| LKPHS | 219                                   |
| LKSIG | 696                                   |
| CSPED | 12 Hz                                 |
| FILDC |                                       |
| FILDF |                                       |

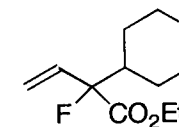

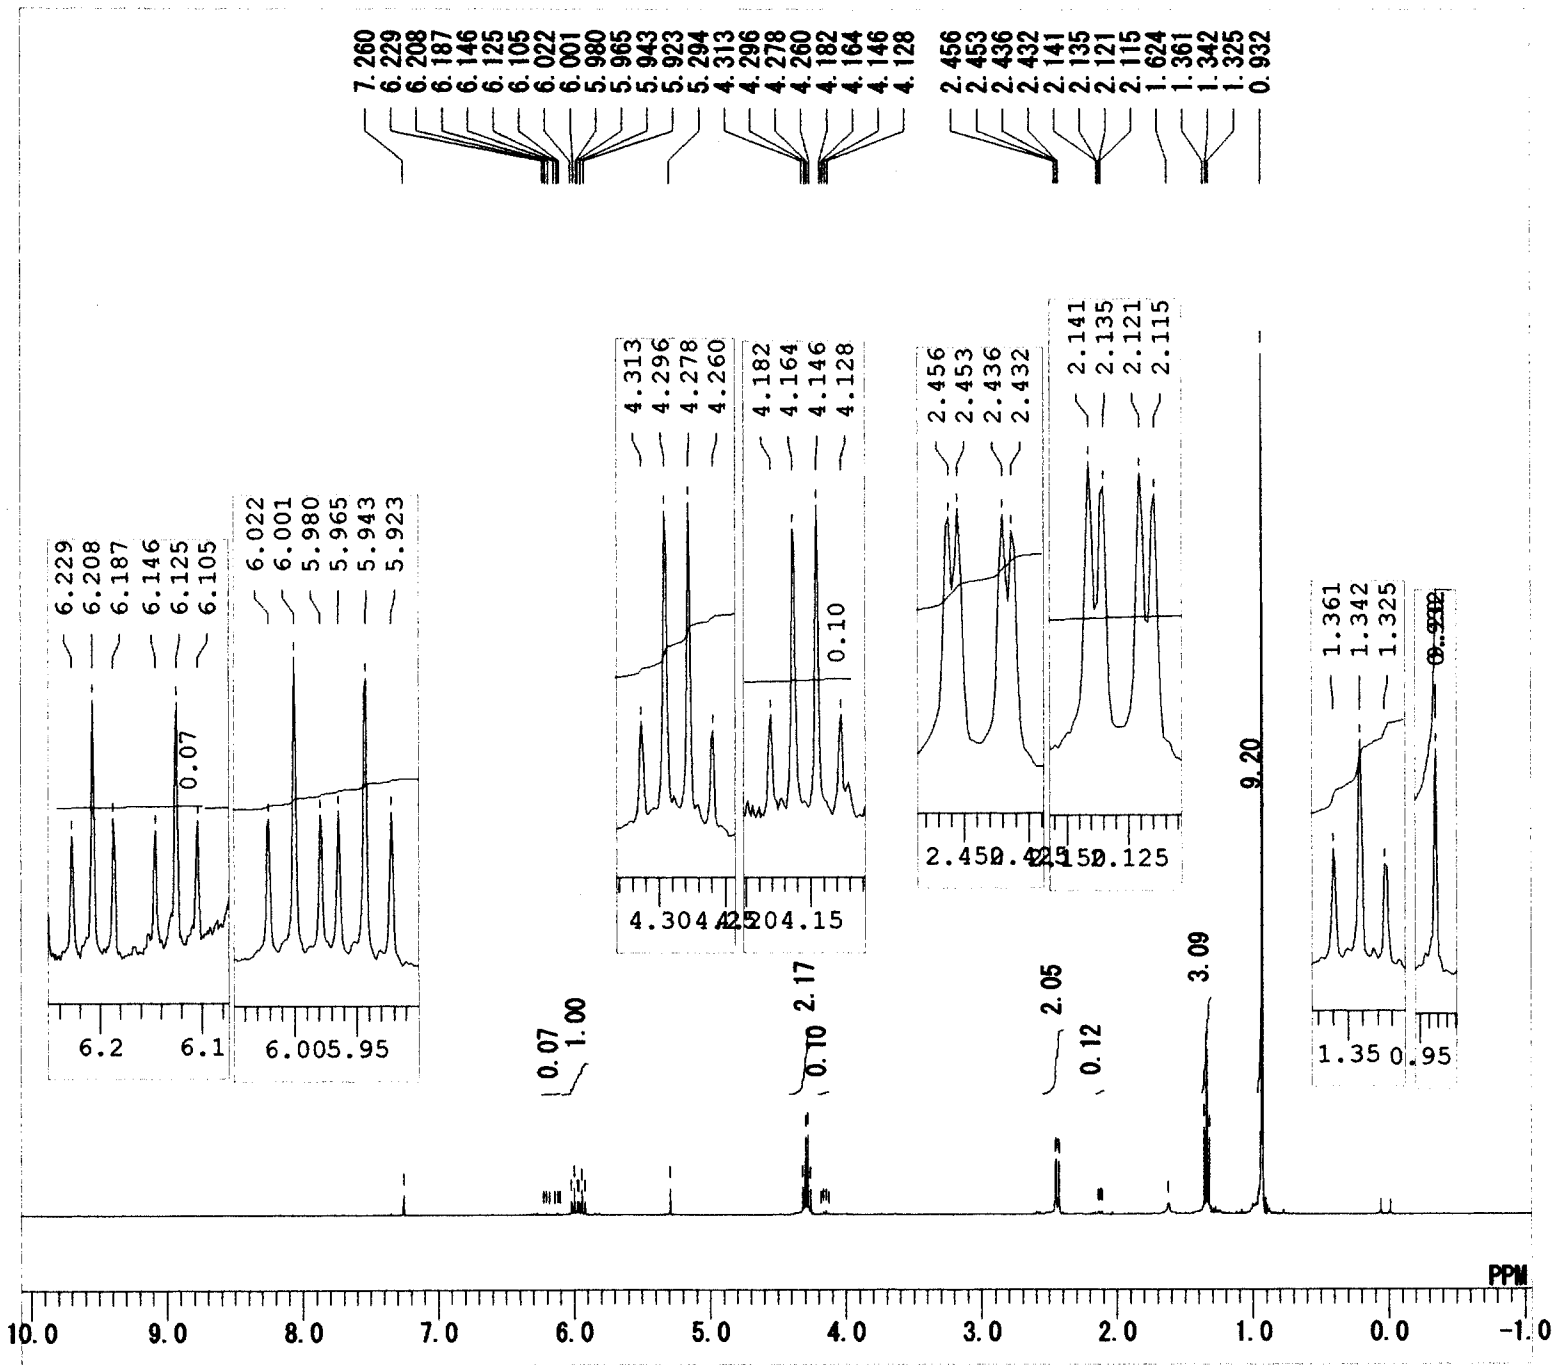

|       |                              |
|-------|------------------------------|
| MENUF | 1H                           |
| OBNUC | 1H                           |
| OFR   | 399.65 MHz                   |
| OBSET | 135.40 KHz                   |
| OBFIN | 24.90 Hz                     |
| PW1   | 5.20 usec                    |
| DEADT | 72.40 usec                   |
| PREDL | 0.20000 msec                 |
| IWT   | 1.0000 msec                  |
| POINT | 16384                        |
| SPO   | 16384                        |
| TIMES | 8                            |
| DUMMY | 1                            |
| FREQU | 7992.01 Hz                   |
| FLT   | 4000 Hz                      |
| DELAY | 50.00 usec                   |
| ACQTM | 2.0501 sec                   |
| PD    | 4.9500 sec                   |
| ADBIT | 16                           |
| RGAIN | 13                           |
| BF    | 0.10 Hz                      |
| T1    | 0.00                         |
| T2    | 0.00                         |
| T3    | 90.00                        |
| T4    | 100.00                       |
| EXMOD | NON                          |
| EXPCM | NON:Single.coupled:PW1_ACQTM |
| IRNUC | 1H                           |
| IFR   | 399.65 MHz                   |
| IRSET | 136.90 KHz                   |
| IRFIN | 97.50 Hz                     |
| IRRPW | 45 usec                      |
| IRATN | 511                          |
| DFILE | 08930 Sn2' t-Bu (H).als      |
| SF    | TH5ATFG2                     |
| LKSET | 61.60 KHz                    |
| LKFIN | 79.0 Hz                      |
| LKLEV | 180                          |
| LGAIN | 26                           |
| LKPHS | 212                          |
| LKSIG | 1643                         |
| CSPED | 10 Hz                        |
| FILDC |                              |
| FILDF |                              |

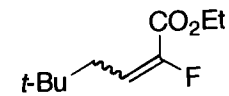

auto

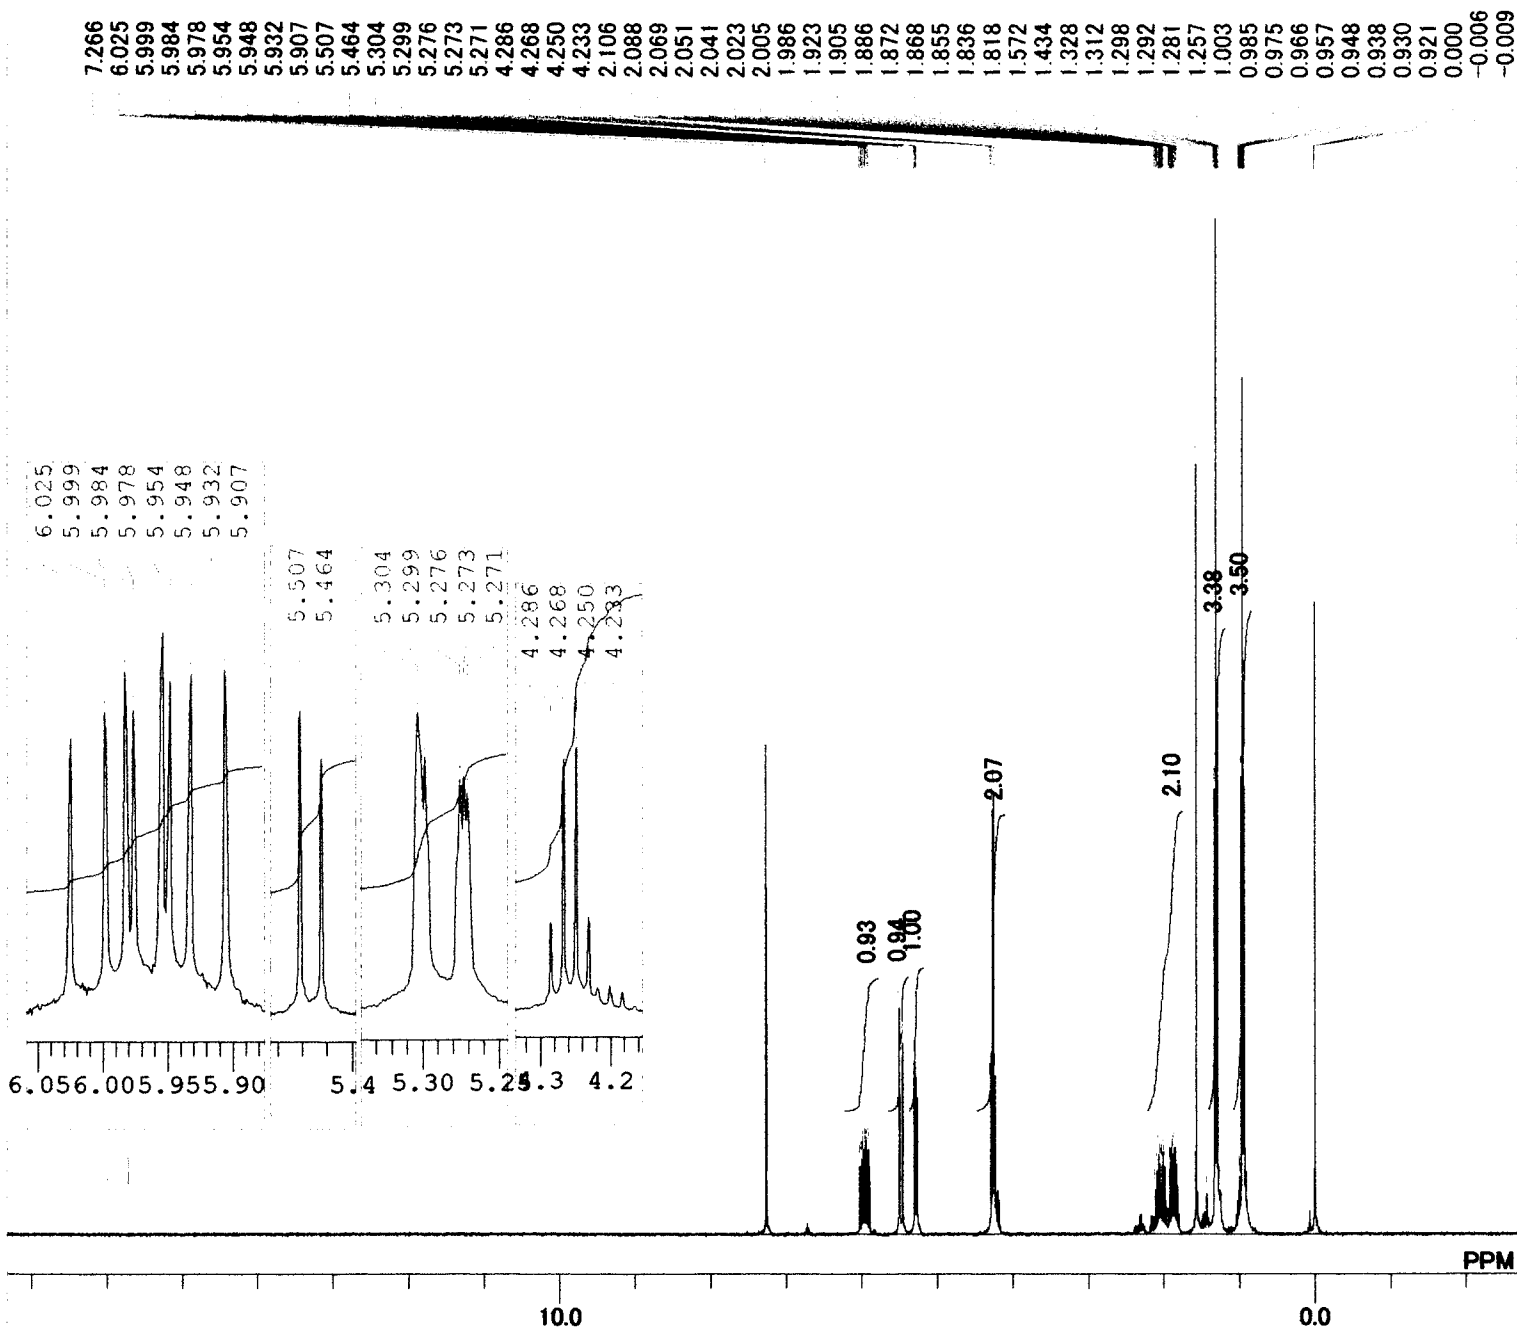

|       |                                  |
|-------|----------------------------------|
| MENUF | 1H                               |
| OBNUC | 1H                               |
| OFR   | 399.65 MHz                       |
| OBSET | 135.40 KHz                       |
| OBFIN | 24.90 Hz                         |
| PW1   | 5.80 usec                        |
| DEADT | 72.10 usec                       |
| PREDL | 0.20000 msec                     |
| IWT   | 1.0000 msec                      |
| POINT | 16384                            |
| SPO   | 16384                            |
| TIMES | 8                                |
| DUMMY | 1                                |
| FREQU | 7992.01 Hz                       |
| FLT   | 4000 Hz                          |
| DELAY | 50.00 usec                       |
| ACQTM | 2.0501 sec                       |
| PD    | 4.9500 sec                       |
| ADBIT | 16                               |
| RGAIN | 18                               |
| BF    | 0.00 Hz                          |
| T1    | 0.00                             |
| T2    | 0.00                             |
| T3    | 90.00                            |
| T4    | 100.00                           |
| EXMOD | NON                              |
| EXPCM | NON:Single.coupled:PW1_ACQTM_PD: |
| IRNUC | 1H                               |
| IFR   | 399.65 MHz                       |
| IRSET | 136.90 KHz                       |
| IRFIN | 97.50 Hz                         |
| IRRPW | 45 usec                          |
| IRATN | 511                              |
| DFILE | _DEFAULT.ALS                     |
| SF    | TH5ATFG2                         |
| LKSET | 61.60 KHz                        |
| LKFIN | 79.0 Hz                          |
| LKLEV | 180                              |
| LGAIN | 24                               |
| LKPHS | 231                              |
| LKSIG | 1040                             |
| CSPED | 12 Hz                            |
| FILDC |                                  |
| FILDF |                                  |

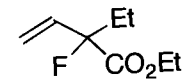

auto

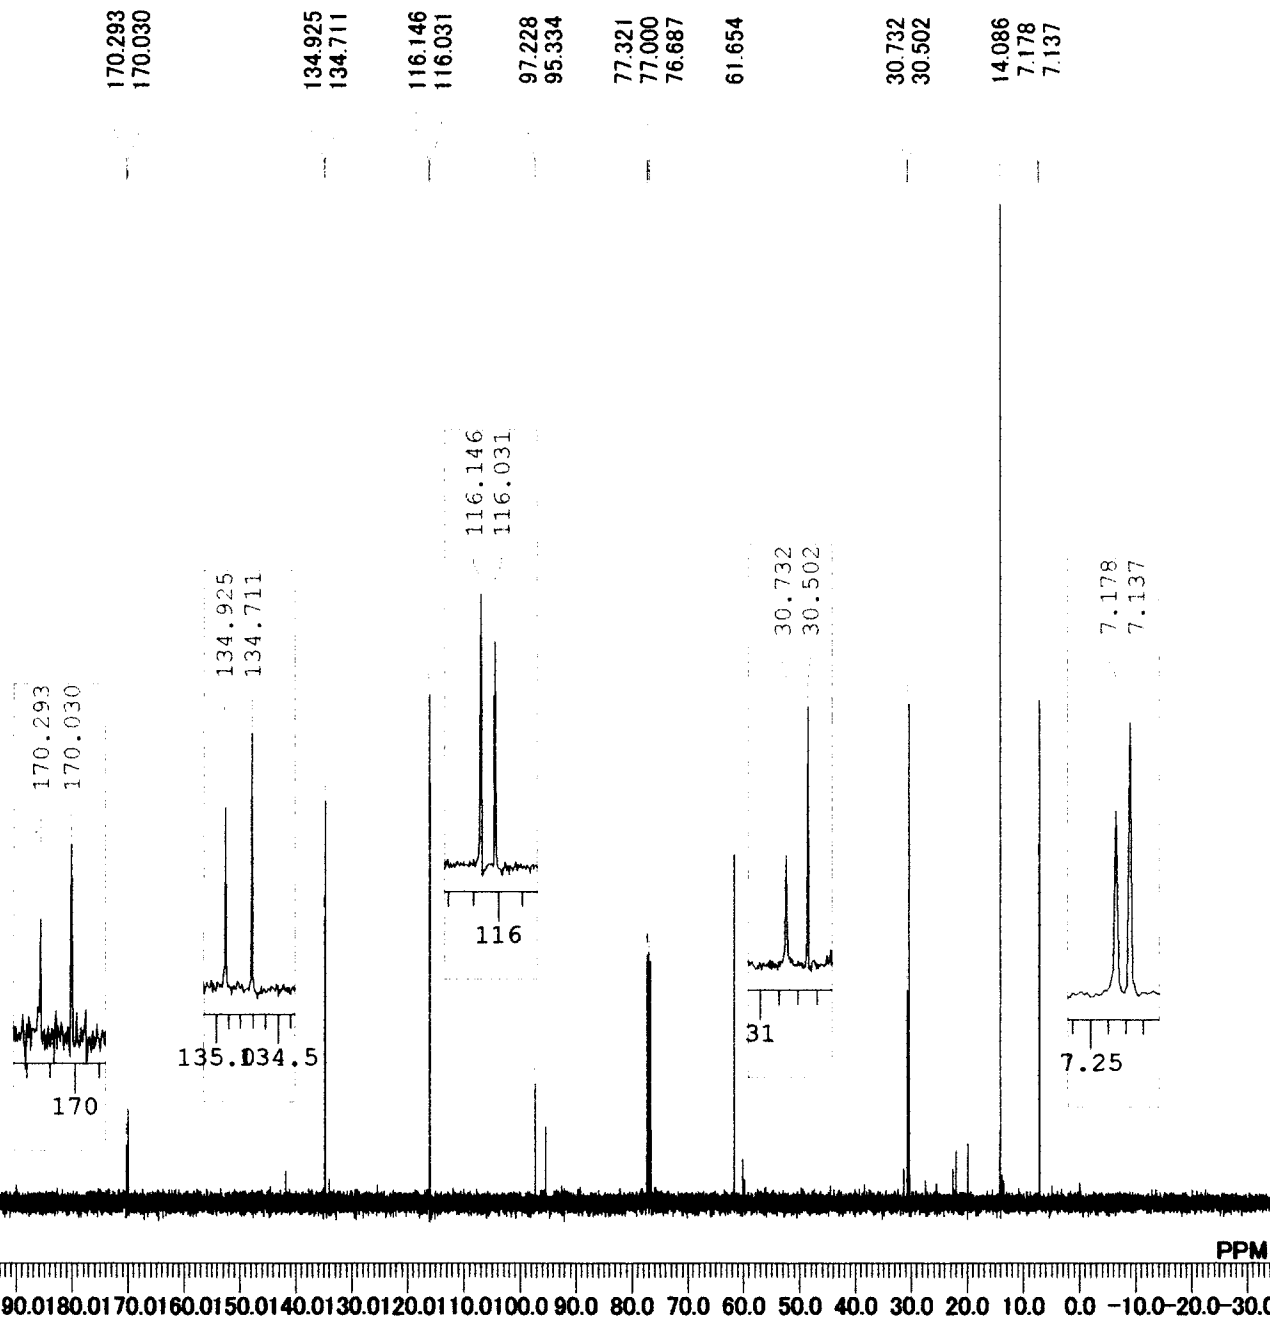

|       |                                       |
|-------|---------------------------------------|
| MENUF | 13C                                   |
| OBNUC | 13C                                   |
| OFR   | 100.40 MHz                            |
| OBSET | 125.00 KHz                            |
| OBFIN | 10500.00 Hz                           |
| PW1   | 6.00 usec                             |
| DEADT | 19.10 usec                            |
| PREDL | 0.20000 msec                          |
| IWT   | 1.0000 msec                           |
| POINT | 32768                                 |
| SPO   | 32768                                 |
| TIMES | 10000                                 |
| DUMMY | 1                                     |
| FREQU | 27118.64 Hz                           |
| FLT   | 13550 Hz                              |
| DELAY | 14.80 usec                            |
| ACQTM | 1.2083 sec                            |
| PD    | 1.7920 sec                            |
| ADBIT | 16                                    |
| RGAIN | 25                                    |
| BF    | 0.00 Hz                               |
| T1    | 0.00                                  |
| T2    | 0.00                                  |
| T3    | 90.00                                 |
| T4    | 100.00                                |
| EXMOD | BCM                                   |
| EXPCM | Bilevel.complete.decoupling:Set_IRRP1 |
| IRNUC | 1H                                    |
| IFR   | 399.65 MHz                            |
| IRSET | 124.00 KHz                            |
| IRFIN | 10500.00 Hz                           |
| IRRPW | 45 usec                               |
| IRATN | 511                                   |
| DFILE | 081017 Sn2' R=CO2Et with Et2Zn (C     |
| SF    | TH5ATFG2                              |
| LKSET | 61.60 KHz                             |
| LKFIN | 79.0 Hz                               |
| LKLEV | 180                                   |
| LGAIN | 24                                    |
| LKPHS | 231                                   |
| LKSIG | 1268                                  |
| CSPED | 14 Hz                                 |
| FILDC |                                       |
| FILDF |                                       |

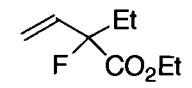

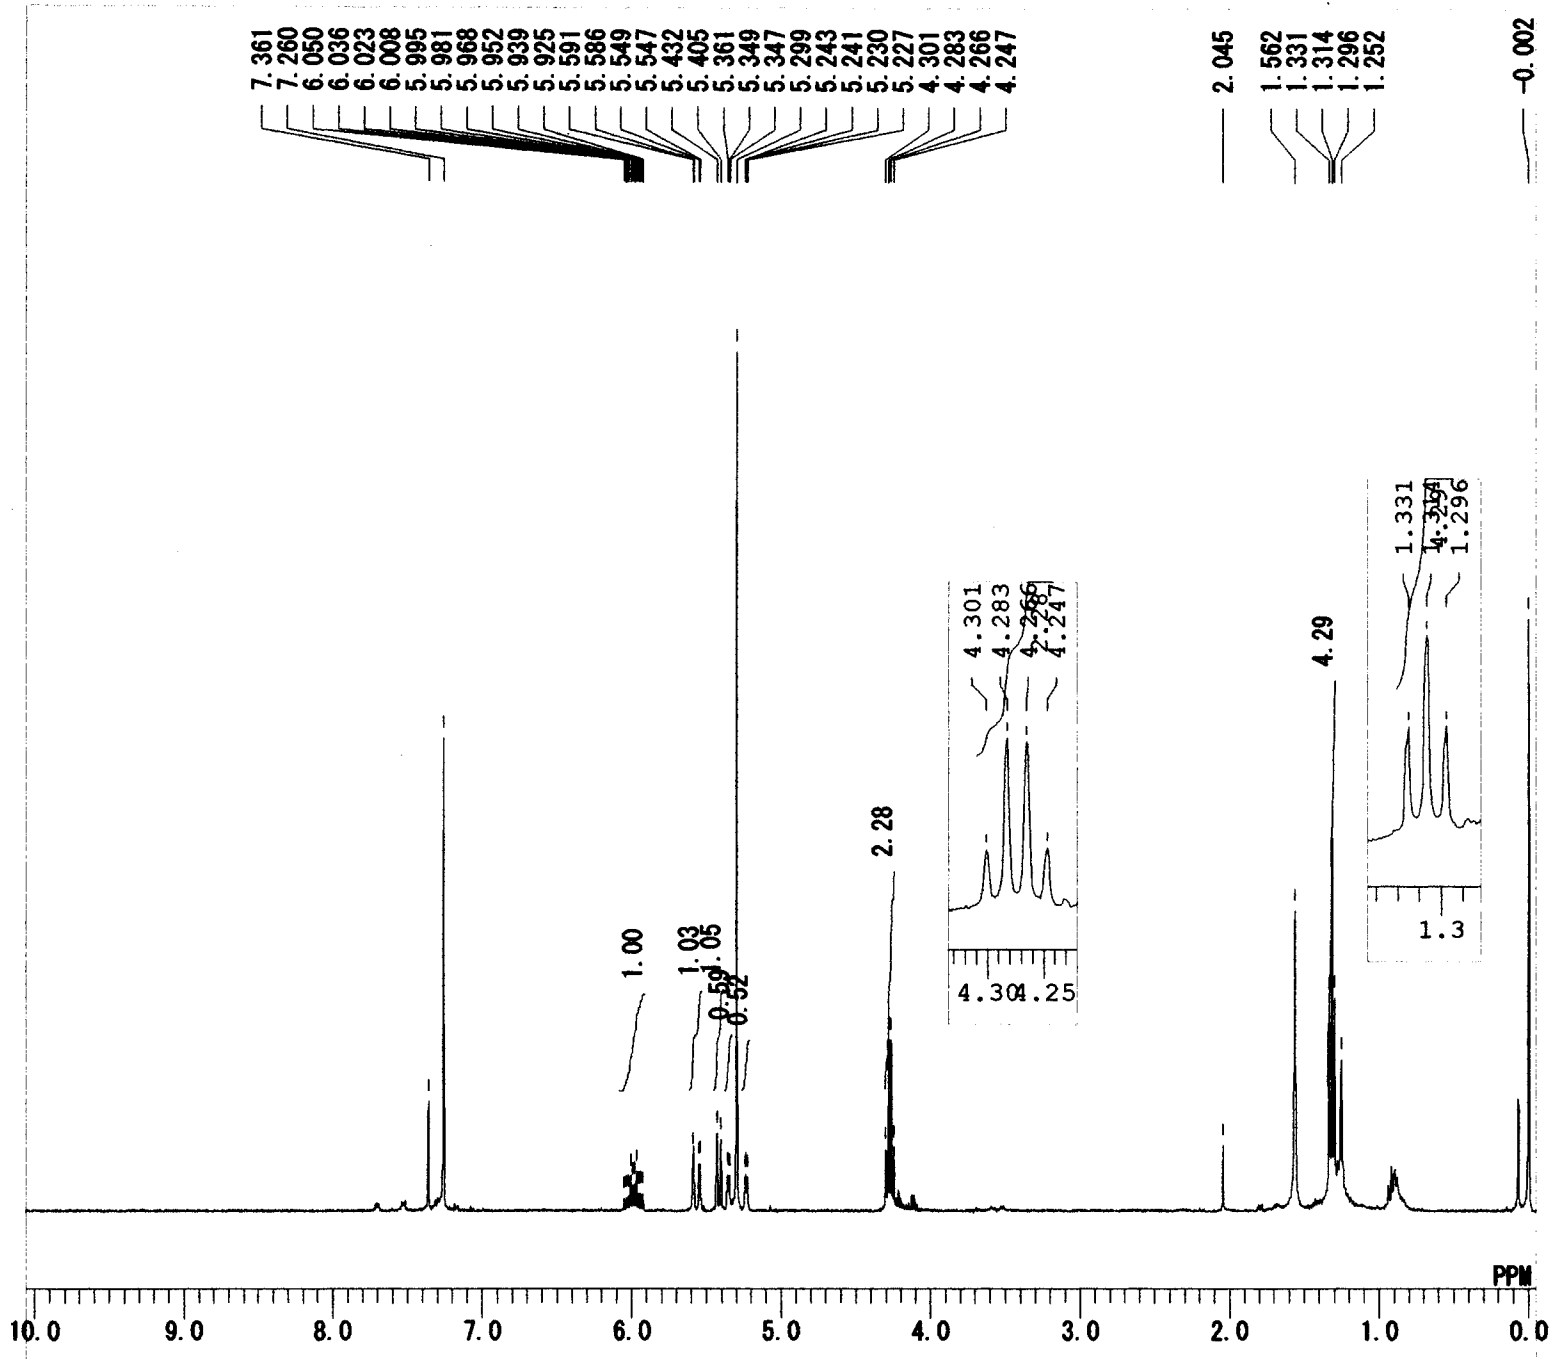

|       |                               |
|-------|-------------------------------|
| MENUF | 1H                            |
| OBNUC | 1H                            |
| OFR   | 399.65 MHz                    |
| OBSET | 135.40 KHz                    |
| OBFIN | 24.90 Hz                      |
| PW1   | 5.20 usec                     |
| DEADT | 72.40 usec                    |
| PREDL | 0.20000 msec                  |
| IWT   | 1.0000 msec                   |
| POINT | 16384                         |
| SPO   | 16384                         |
| TIMES | 8                             |
| DUMMY | 1                             |
| FREQU | 7992.01 Hz                    |
| FLT   | 4000 Hz                       |
| DELAY | 50.00 usec                    |
| ACQTM | 2.0501 sec                    |
| PD    | 4.9500 sec                    |
| ADBIT | 16                            |
| RGAIN | 21                            |
| BF    | 0.10 Hz                       |
| T1    | 0.00                          |
| T2    | 0.00                          |
| T3    | 90.00                         |
| T4    | 100.00                        |
| EXMOD | NON                           |
| EXPCM | NON:Single. coupled:PW1_ACQTM |
| IRNUC | 1H                            |
| IFR   | 399.65 MHz                    |
| IRSET | 136.90 KHz                    |
| IRFIN | 97.50 Hz                      |
| IRRPW | 45 usec                       |
| IRATN | 511                           |
| DFILE | 08228 Sn2' R=C02Et with Ph (I |
| SF    | TH5ATFG2                      |
| LKSET | 61.60 KHz                     |
| LKFIN | 79.0 Hz                       |
| LKLEV | 180                           |
| LGAIN | 23                            |
| LKPHS | 219                           |
| LKSIG | 775 Hz                        |
| CSPED | 12 Hz                         |
| FILDC |                               |
| FILDF |                               |

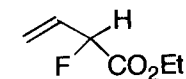



auto

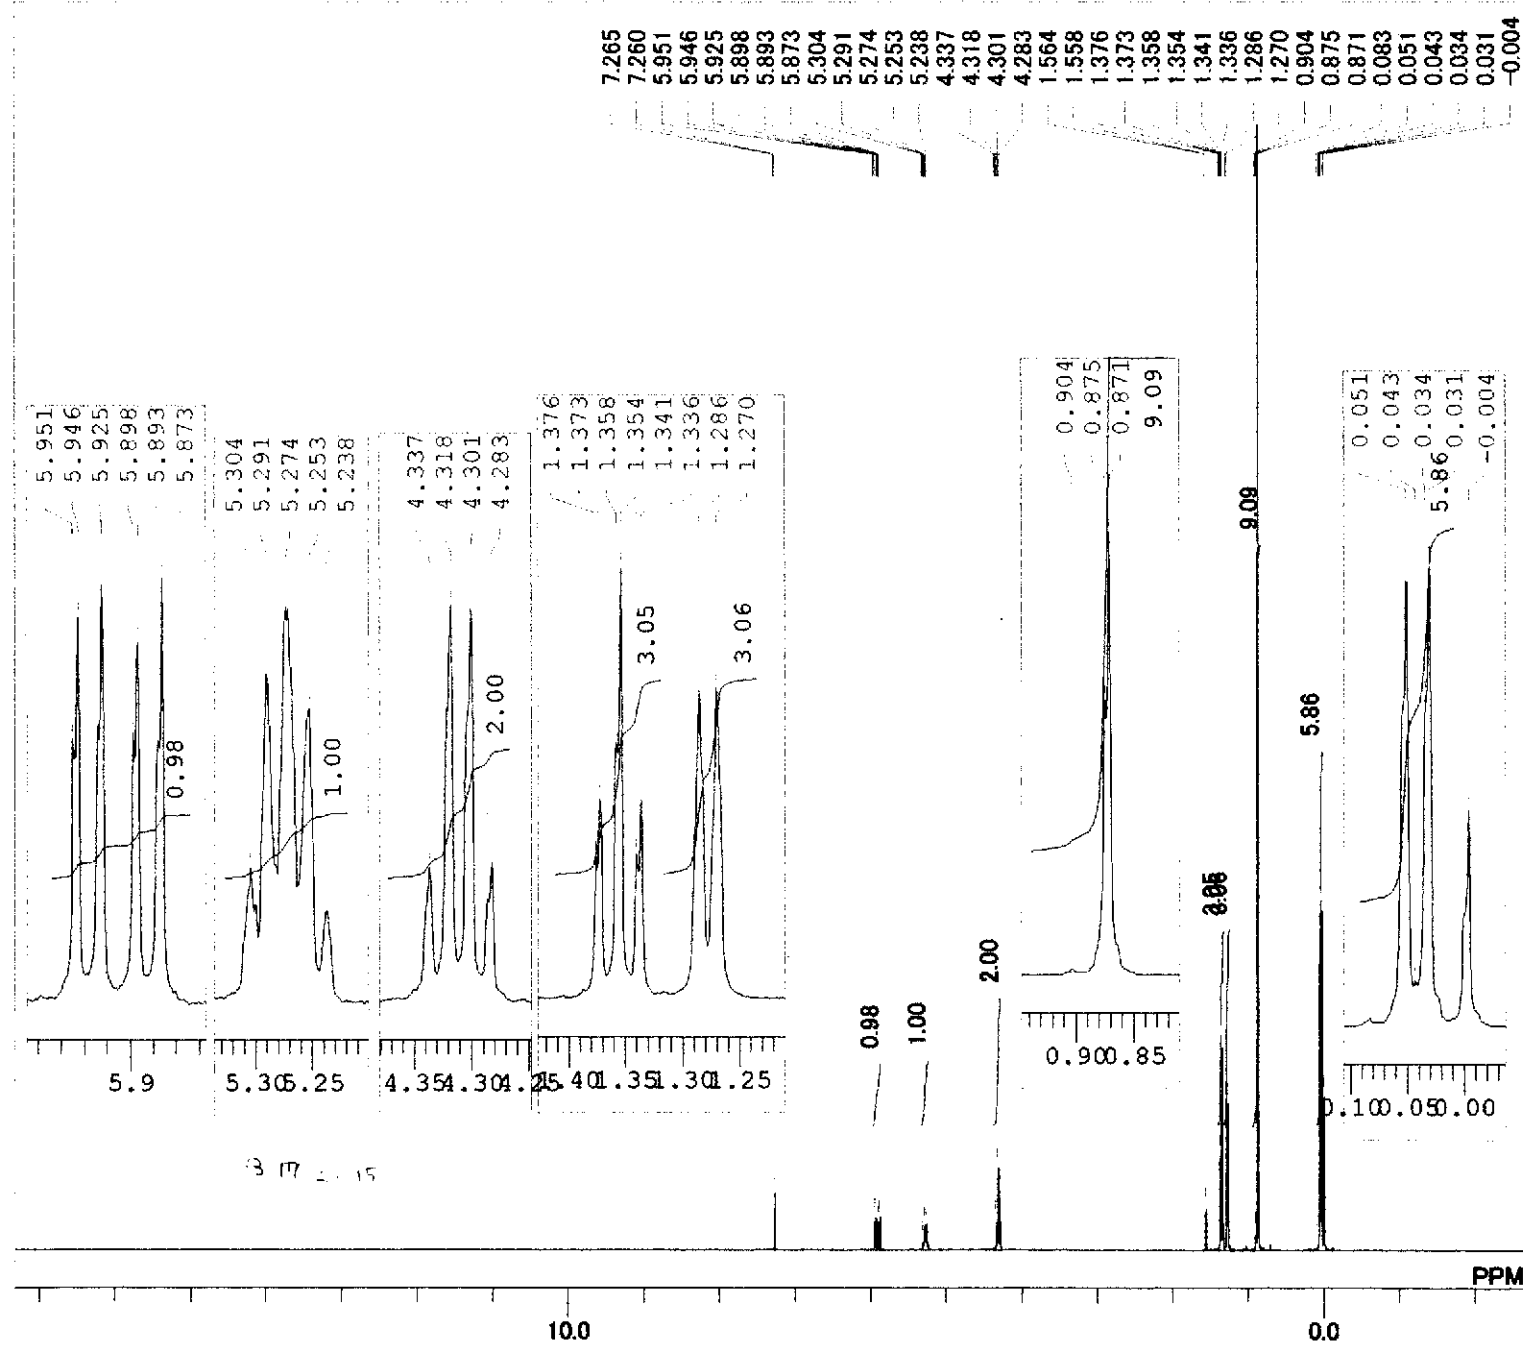

|       |                                  |
|-------|----------------------------------|
| MENUP | 1H                               |
| OBNUC | 1H                               |
| OFR   | 399.65 MHz                       |
| OBSET | 135.40 KHz                       |
| OBFIN | 24.90 Hz                         |
| PW1   | 5.20 usec                        |
| DEADT | 72.40 usec                       |
| PREDL | 0.20000 msec                     |
| IWT   | 1.0000 msec                      |
| POINT | 16384                            |
| SPO   | 16384                            |
| TIMES | 8                                |
| DUMMY | 1                                |
| FREQU | 7992.01 Hz                       |
| FLT   | 4000 Hz                          |
| DELAY | 50.00 usec                       |
| ACQTM | 2.0501 sec                       |
| PD    | 4.9500 sec                       |
| ADBIT | 16                               |
| RGAIN | 15                               |
| BF    | 0.10 Hz                          |
| T1    | 0.00                             |
| T2    | 0.00                             |
| T3    | 90.00                            |
| T4    | 100.00                           |
| EXMOD | NON                              |
| EXPCM | NON:Single.coupled:PW1_ACQTM_PD: |
| IRNUC | 1H                               |
| IFR   | 399.65 MHz                       |
| IRSET | 136.90 KHz                       |
| IRFIN | 97.50 Hz                         |
| IRRPW | 45 usec                          |
| IRATN | 511                              |
| DFILE | DEFAULT.ALS                      |
| SF    | TH5ATFG2-                        |
| LKSET | 61.60 KHz                        |
| LKFIN | 79.0 Hz                          |
| LKLEV | 180                              |
| LGAIN | 23                               |
| LKPHS | 219                              |
| LKSIG | 733                              |
| CSPED | 13 Hz                            |
| FILDC |                                  |
| FILDF |                                  |

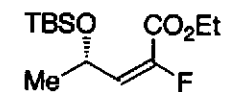

auto

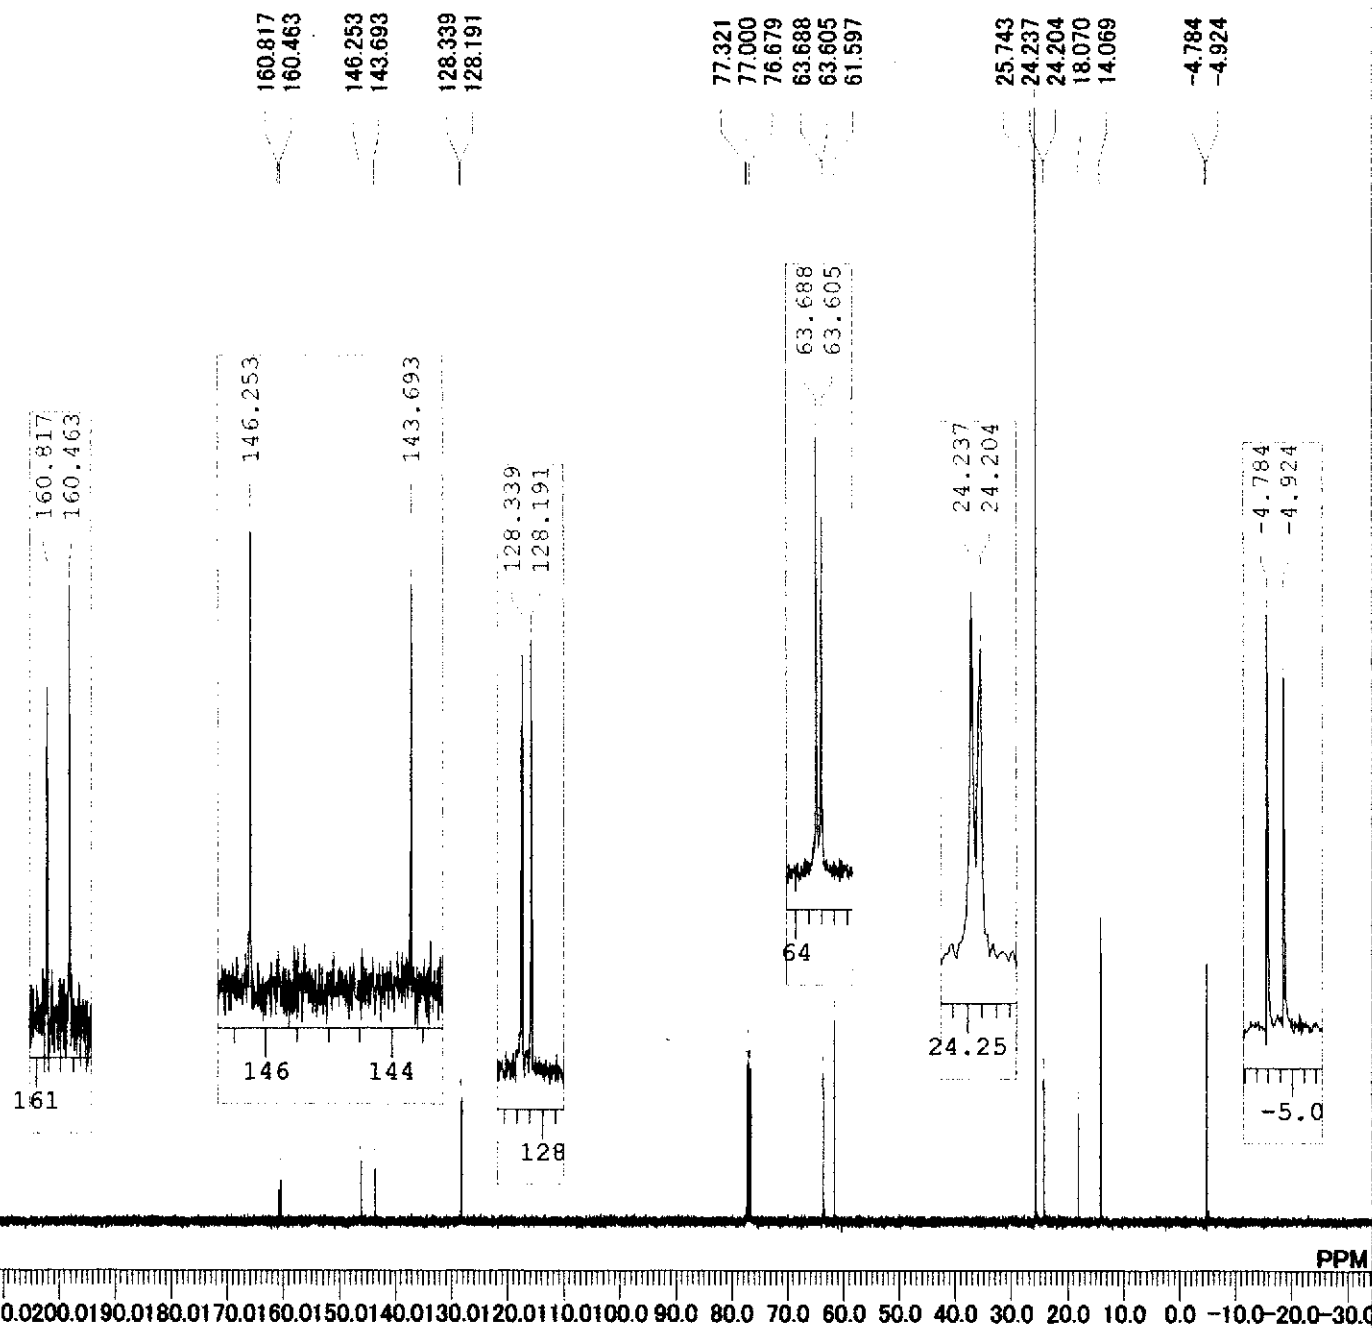

|       |                                      |
|-------|--------------------------------------|
| MENUF | 13C                                  |
| OBNUC | 13C                                  |
| OFR   | 100.40 MHz                           |
| OBSET | 125.00 KHz                           |
| OBFIN | 10500.00 Hz                          |
| PW1   | 6.00 usec                            |
| DEADT | 19.10 usec                           |
| PREDL | 0.20000 msec                         |
| IWT   | 1.0000 msec                          |
| POINT | 32768                                |
| SPO   | 32768                                |
| TIMES | 258                                  |
| DUMMY | 1                                    |
| FREQU | 27118.64 Hz                          |
| FLT   | 13550 Hz                             |
| DELAY | 14.80 usec                           |
| ACQTM | 1.2083 sec                           |
| PD    | 1.7920 sec                           |
| ADBIT | 16                                   |
| RGAIN | 25                                   |
| BF    | 0.10 Hz                              |
| T1    | 0.00                                 |
| T2    | 0.00                                 |
| T3    | 90.00                                |
| T4    | 100.00                               |
| EXMOD | BCM                                  |
| EXPCM | Bilevel.complete.decoupling:Set_IRRP |
| IRNUC | 1H                                   |
| IFR   | 399.65 MHz                           |
| IRSET | 124.00 KHz                           |
| IRFIN | 10500.00 Hz                          |
| IRRPW | 45 usec                              |
| IRATN | 511                                  |
| DFILE | 08219 キラルアリルエステル(C).als              |
| SF    | TH5ATFG2-                            |
| LKSET | 61.60 KHz                            |
| LKFIN | 79.0 Hz                              |
| LKLEV | 180                                  |
| LGAIN | 25                                   |
| LKPHS | 219                                  |
| LKSIG | 1004                                 |
| CSPED | 13 Hz                                |
| FILDC |                                      |
| FILDF |                                      |

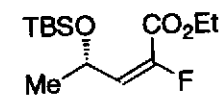

auto

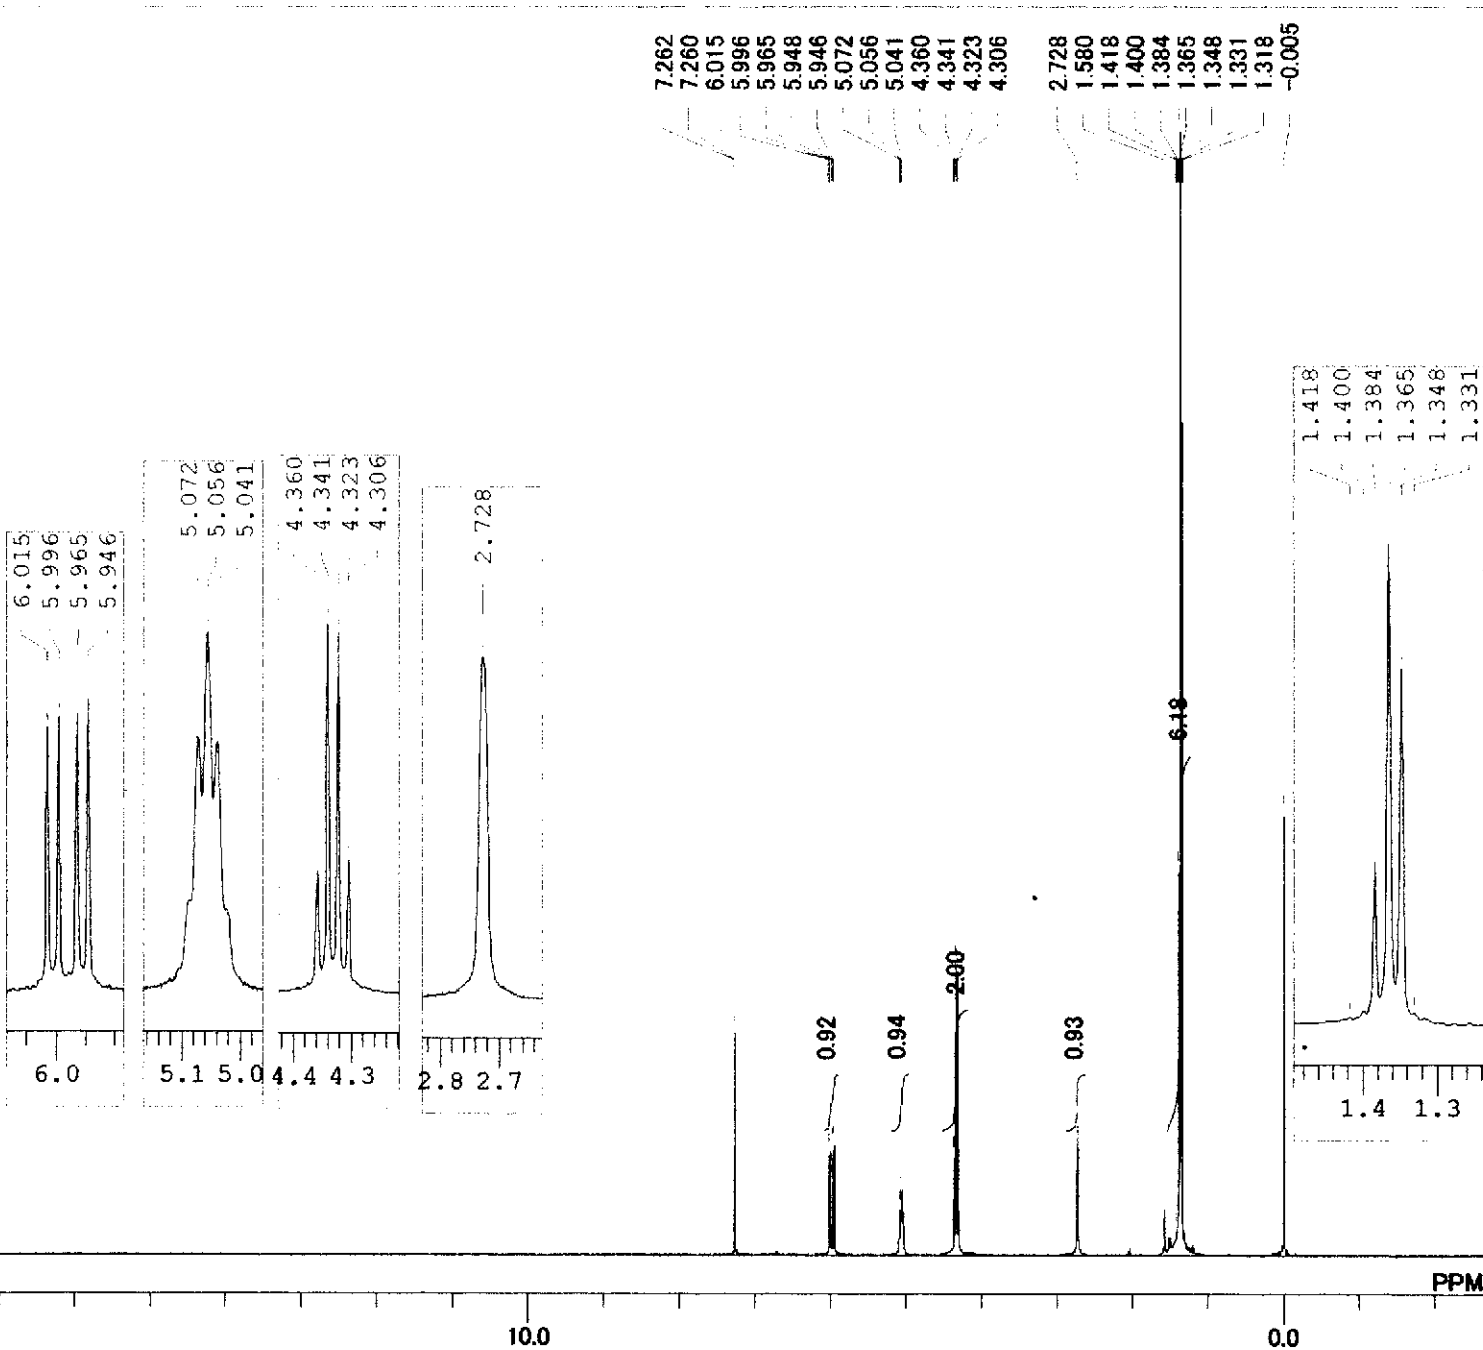

MENUF 1H  
 OBNUC 1H  
 OFR 399.65 MHz  
 OBSET 135.40 KHz  
 OBFIN 24.90 Hz  
 PW1 5.20 usec  
 DEADT 72.40 usec  
 PREDL 0.20000 msec  
 IWT 1.0000 msec  
 POINT 16384  
 SPO 16384  
 TIMES 8  
 DUMMY 1  
 FREQU 7992.01 Hz  
 FLT 4000 Hz  
 DELAY 50.00 usec  
 ACQTM 2.0501 sec  
 PD 4.9500 sec  
 ADBIT 16  
 RGAIN 19  
 BF 0.10 Hz  
 T1 0.00  
 T2 0.00  
 T3 90.00  
 T4 100.00  
 EXMOD NON  
 EXPCM NON:Single.coupled:PW1\_ACQTM\_PD:  
 IRNUC 1H  
 IFR 399.65 MHz  
 IRSET 136.90 KHz  
 IRFIN 97.50 Hz  
 IRRPW 45 usec  
 IRATN 511  
 DFILE DEFAULT.ALS  
 SF TH5ATFG2-  
 LKSET 61.60 KHz  
 LKFIN 79.0 Hz  
 LKLEV 180  
 LGAIN 24  
 LKPHS 219  
 LKSIG 800 Hz  
 CSPED 14 Hz  
 FILDC  
 FILDF

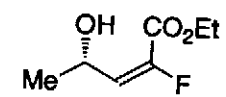



auto

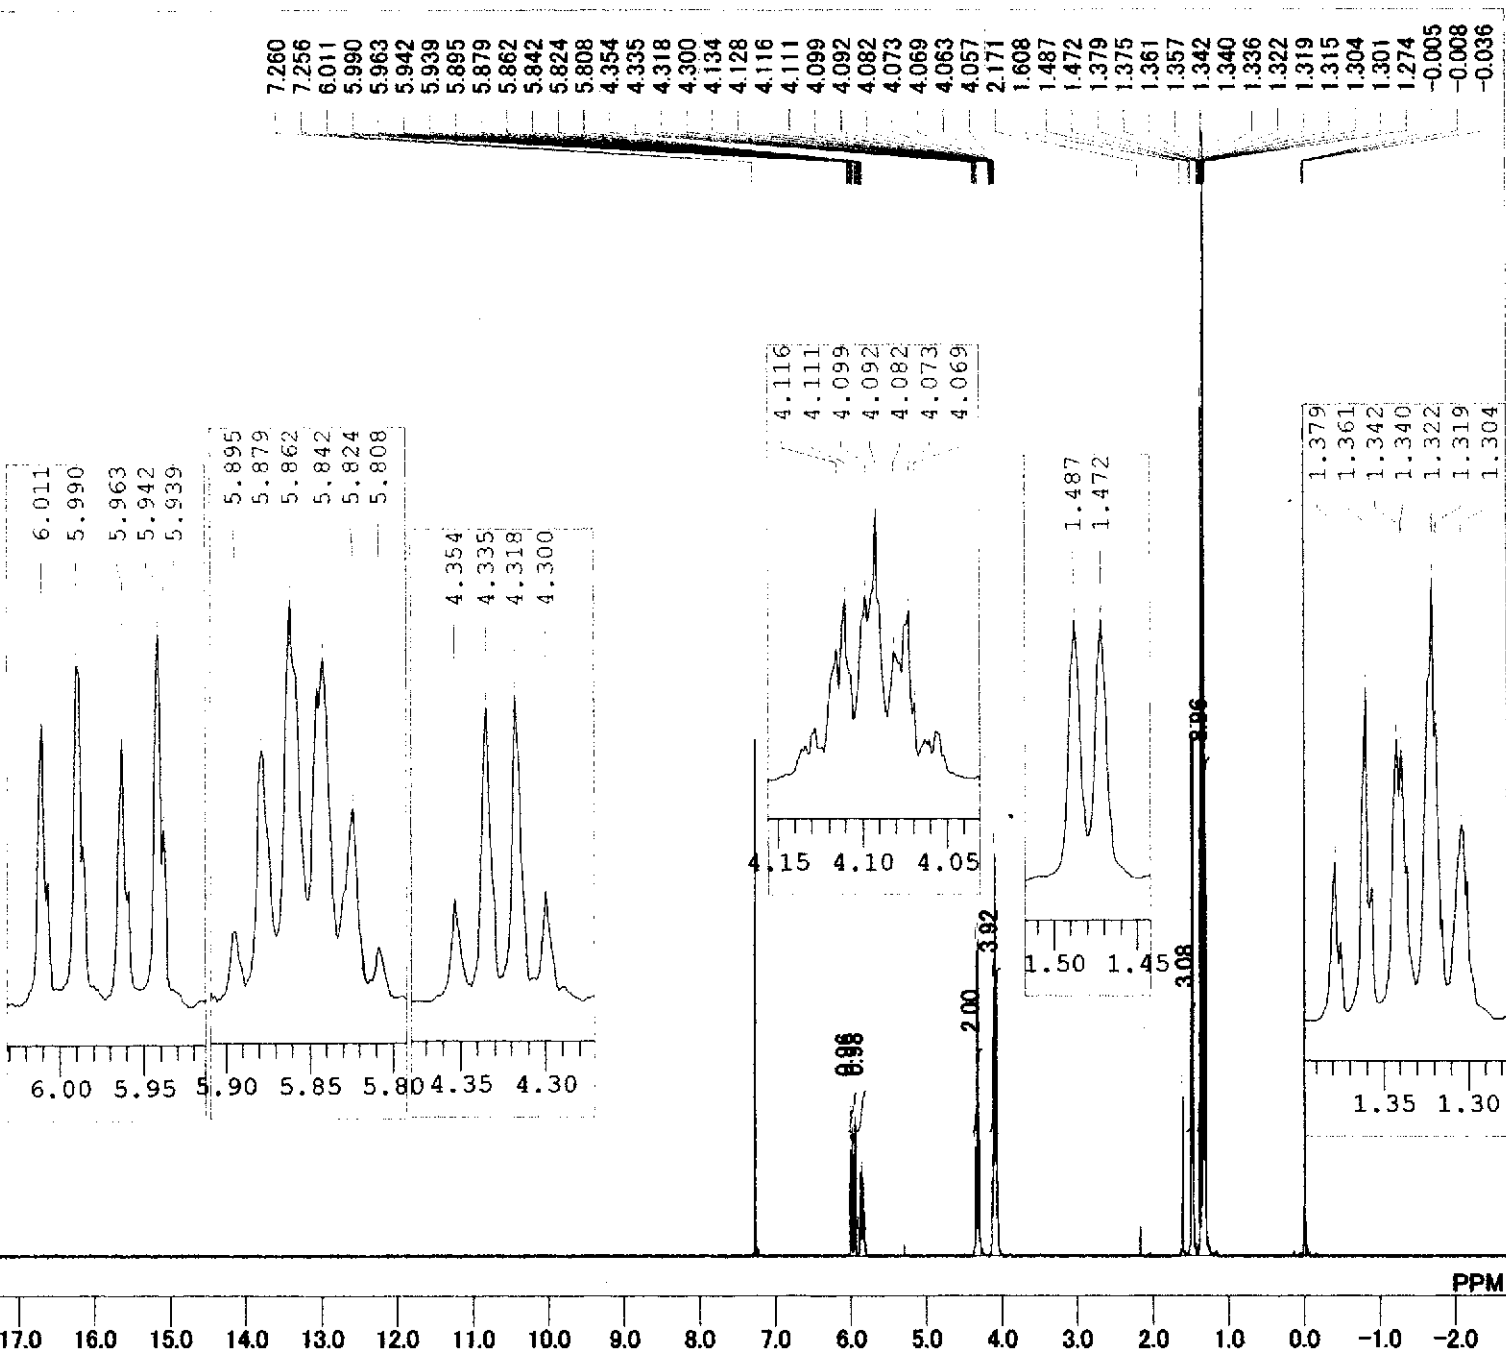

|       |                                  |
|-------|----------------------------------|
| MENUF | 1H                               |
| OBNUC | 1H                               |
| OFR   | 399.65 MHz                       |
| OBSET | 135.40 KHz                       |
| OBFIN | 24.90 Hz                         |
| PW1   | 5.20 usec                        |
| DEADT | 72.40 usec                       |
| PREDL | 0.20000 msec                     |
| IWT   | 1.0000 msec                      |
| POINT | 16384                            |
| SPO   | 16384                            |
| TIMES | 8                                |
| DUMMY | 1                                |
| FREQU | 7992.01 Hz                       |
| FLT   | 4000 Hz                          |
| DELAY | 50.00 usec                       |
| ACQTM | 2.0501 sec                       |
| PD    | 4.9500 sec                       |
| ADBIT | 16                               |
| RGAIN | 17                               |
| BF    | 0.10 Hz                          |
| T1    | 0.00                             |
| T2    | 0.00                             |
| T3    | 90.00                            |
| T4    | 100.00                           |
| EXMOD | NON                              |
| EXPCM | NON:Single.coupled:PW1_ACQTM_PD: |
| IRNUC | 1H                               |
| IFR   | 399.65 MHz                       |
| IRSET | 136.90 KHz                       |
| IRFIN | 97.50 Hz                         |
| IRRPW | 45 usec                          |
| IRATN | 511                              |
| DFILE | 08217 キラルリン酸エステル(H).als          |
| SF    | TH5ATFG2-                        |
| LKSET | 61.60 KHz                        |
| LKFIN | 79.0 Hz                          |
| LKLEV | 180                              |
| LGAIN | 25                               |
| LKPHS | 219                              |
| LKSIG | 1434                             |
| CSPED | 11 Hz                            |
| FILDC |                                  |
| FILDF |                                  |

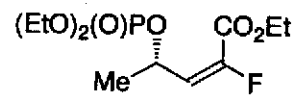

auto

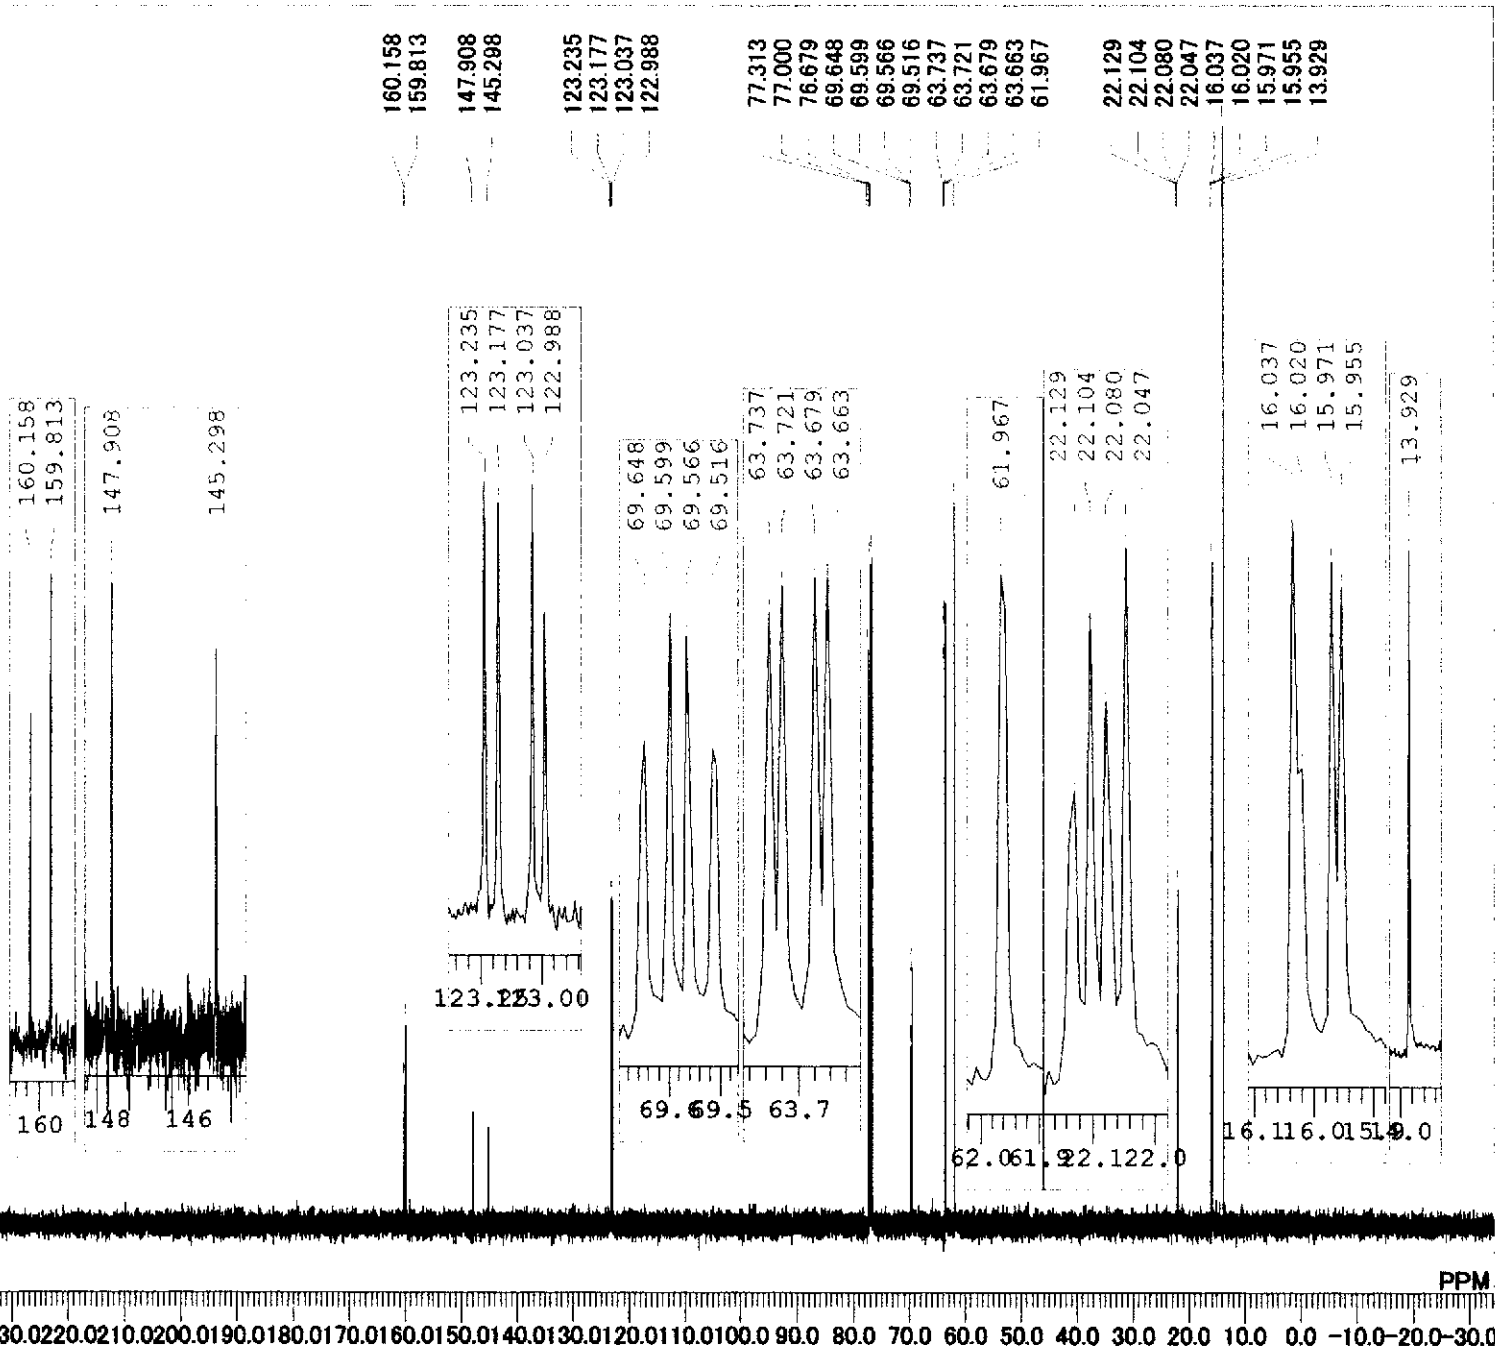

|       |                                       |
|-------|---------------------------------------|
| MENUF | 13C                                   |
| OBNUC | 13C                                   |
| OFR   | 100.40 MHz                            |
| OBSET | 125.00 KHz                            |
| OBFIN | 10500.00 Hz                           |
| PWI   | 6.00 usec                             |
| DEADT | 19.10 usec                            |
| PREDL | 0.20000 msec                          |
| IWT   | 1.0000 msec                           |
| POINT | 32768                                 |
| SPO   | 32768                                 |
| TIMES | 256                                   |
| DUMMY | 1                                     |
| FREQU | 27118.64 Hz                           |
| FLT   | 13550 Hz                              |
| DELAY | 14.80 usec                            |
| ACQTM | 1.2083 sec                            |
| PD    | 1.7920 sec                            |
| ADBIT | 16                                    |
| RGAIN | 24                                    |
| BF    | 0.10 Hz                               |
| T1    | 0.00                                  |
| T2    | 0.00                                  |
| T3    | 100.00                                |
| T4    | 100.00                                |
| EXMOD | BCM                                   |
| EXPCM | Bilevel.complete.decoupling:Set_IRRP1 |
| IRNUC | 1H                                    |
| IFR   | 399.65 MHz                            |
| IRSET | 124.00 KHz                            |
| IRFIN | 10500.00 Hz                           |
| IRRPW | 45 usec                               |
| IRATN | 511                                   |
| DFILE | 08220 キラルーOP(C).als                   |
| SF    | TH5ATFG2                              |
| LKSET | 61.60 KHz                             |
| LKFIN | 79.0 Hz                               |
| LKLEV | 180                                   |
| LGAIN | 24                                    |
| LKPHS | 219                                   |
| LKSIG | 1041                                  |
| CSPED | 12 Hz                                 |
| FILDC |                                       |
| FILDF |                                       |

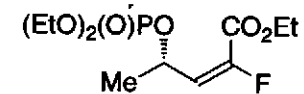

auto

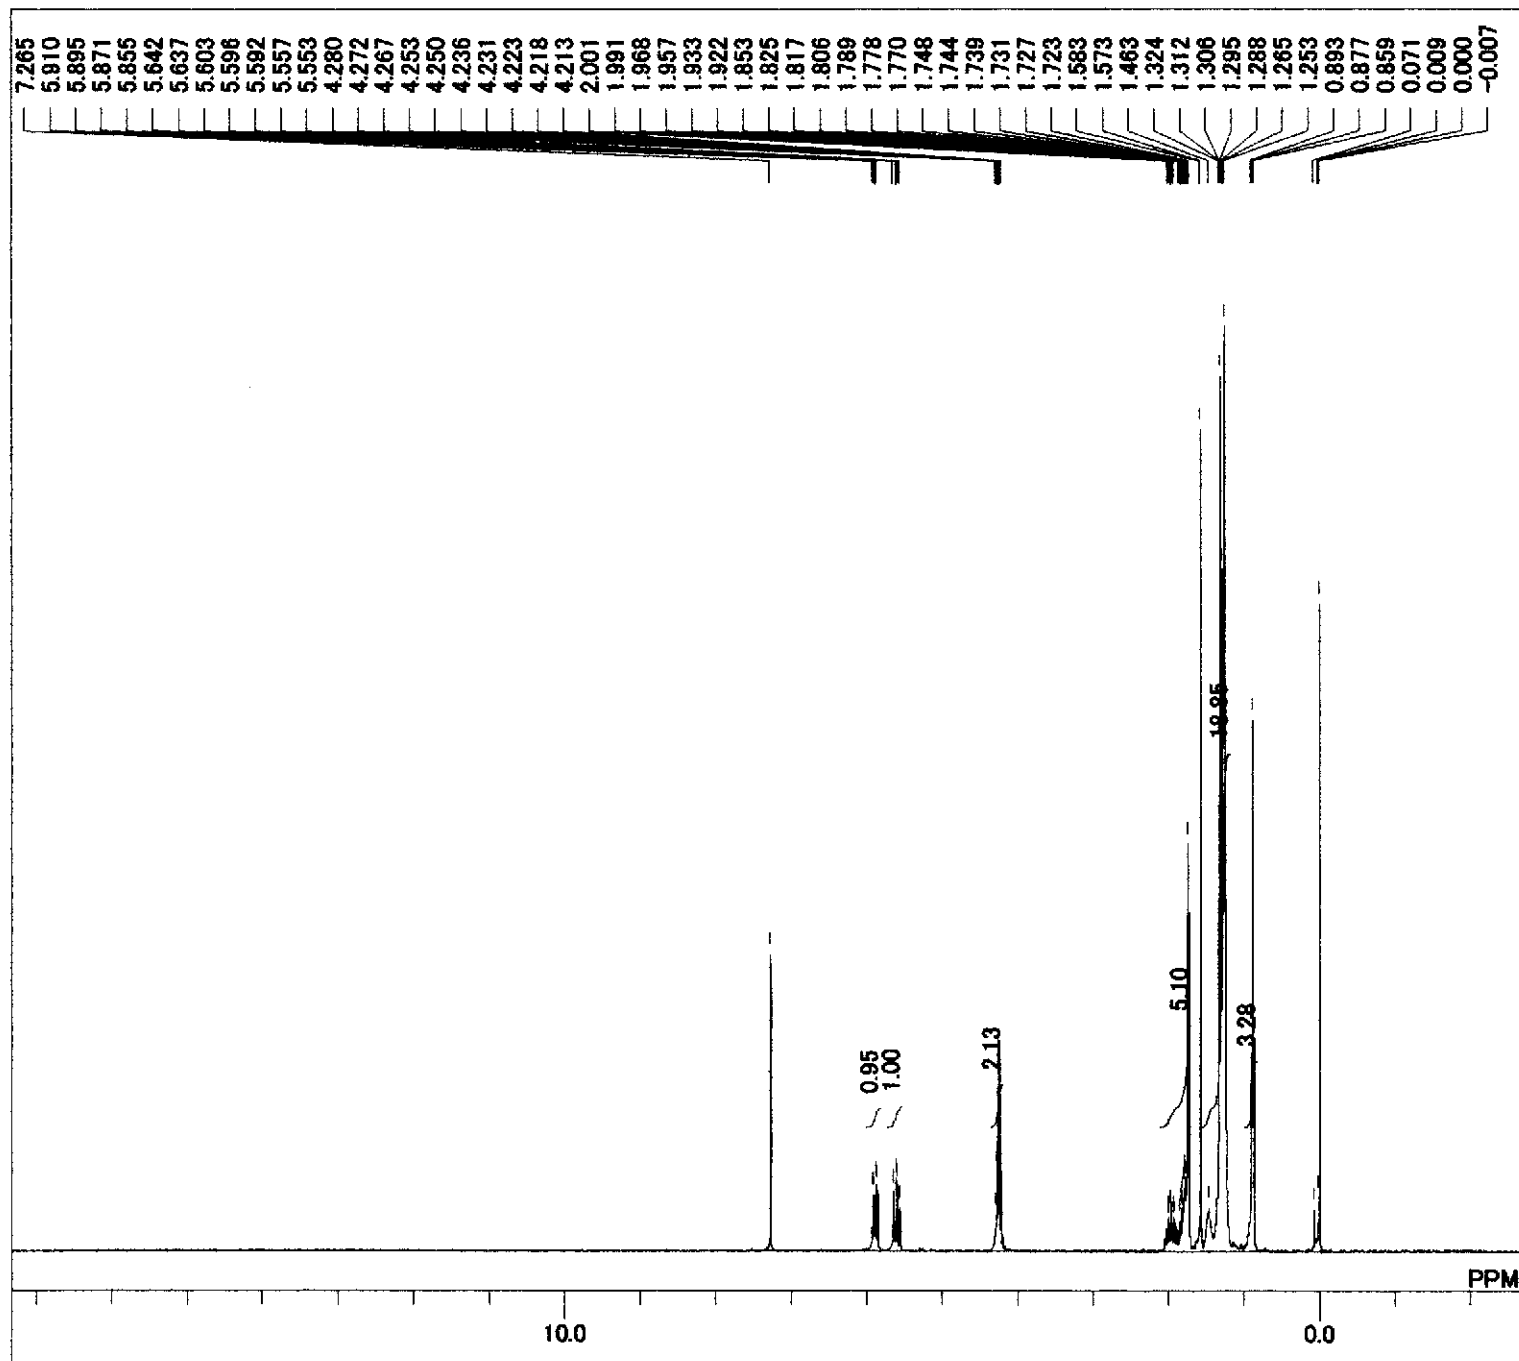

|       |                                  |
|-------|----------------------------------|
| MENUF | 1H                               |
| OBNUC | 1H                               |
| OFR   | 399.65 MHz                       |
| OBSET | 135.40 KHz                       |
| OBFIN | 24.90 Hz                         |
| PW1   | 5.20 usec                        |
| DEADT | 72.40 usec                       |
| PREDL | 0.20000 msec                     |
| IWT   | 1.0000 msec                      |
| POINT | 16384                            |
| SPO   | 16384                            |
| TIMES | 8                                |
| DUMMY | 1                                |
| FREQU | 7992.01 Hz                       |
| FLT   | 4000 Hz                          |
| DELAY | 50.00 usec                       |
| ACQTM | 2.0501 sec                       |
| PD    | 4.9500 sec                       |
| ADBIT | 16                               |
| RGAIN | 16                               |
| BF    | 0.10 Hz                          |
| T1    | 0.00                             |
| T2    | 0.00                             |
| T3    | 90.00                            |
| T4    | 100.00                           |
| EXMOD | NON                              |
| EXPCM | NON:Single.coupled:PW1_ACQTM_PD: |
| IRNUC | 1H                               |
| IFR   | 399.65 MHz                       |
| IRSET | 136.90 KHz                       |
| IRFIN | 97.50 Hz                         |
| IRRPW | 45 usec                          |
| IRATN | 511                              |
| DFILE | 08820 キラル Sn2' with n-C9H19 (H   |
| SF    | TH5ATFG2                         |
| LKSET | 61.80 KHz                        |
| LKFIN | 79.0 Hz                          |
| LKLEV | 180                              |
| LGAIN | 26                               |
| LKPHS | 221                              |
| LKSIG | 1862                             |
| CSPED | 11 Hz                            |
| FILDC |                                  |
| FILDF |                                  |

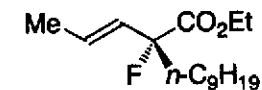

auto

170.836  
170.573  
128.273  
128.067  
127.491  
127.384  
128.273  
128.067  
127.491  
127.384  
96.643  
94.774  
77.321  
77.000  
76.687  
61.473  
37.779  
37.557  
31.802  
29.390  
29.357  
29.300  
29.209  
22.886  
22.854  
22.598  
17.609  
14.094  
14.020

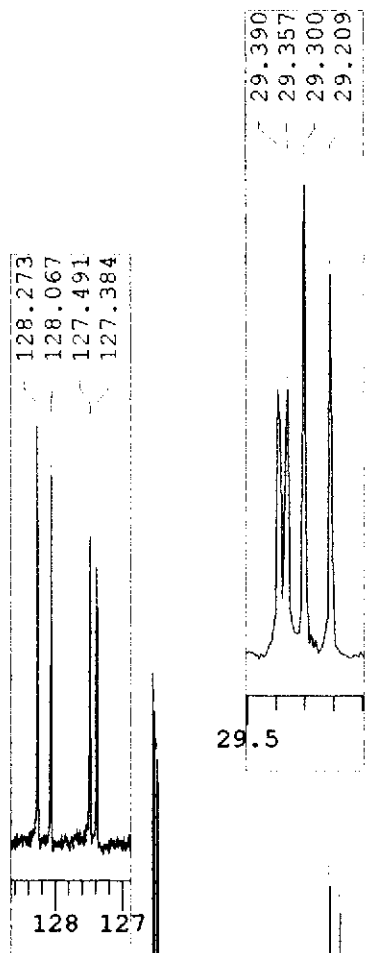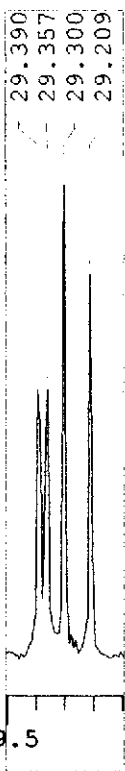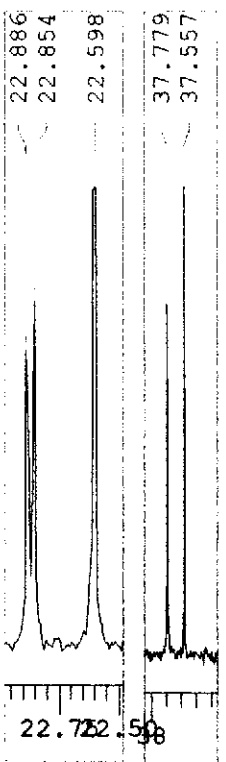

MENUF 13C  
 OBNUC 13C  
 OFR 100.40 MHz  
 OBSET 125.00 KHz  
 OBFIN 10500.00 Hz  
 PW1 6.00 usec  
 DEADT 19.10 usec  
 PREDL 0.20000 msec  
 IWT 1.0000 msec  
 POINT 32768  
 SPO 32768  
 TIMES 50000  
 DUMMY 1  
 FREQU 27118.64 Hz  
 FLT 13550 Hz  
 DELAY 14.80 usec  
 ACQTM 1.2083 sec  
 PD 1.7920 sec  
 ADBIT 16  
 RGAIN 24  
 BF 0.10 Hz  
 T1 0.00  
 T2 0.00  
 T3 90.00  
 T4 100.00  
 EXMOD BCM  
 EXPCM Bilevel.complete.decoupling.Set\_IRRP1  
 IRNUC 1H  
 IFR 399.65 MHz  
 IRSET 124.00 KHz  
 IRFIN 10500.00 Hz  
 IRRPW 45 usec  
 IRATN 511  
 DFILE 08820 キラル Sn2' with n-C9H19 (C  
 TH5ATFG2  
 LKSET 61.60 KHz  
 LKFIN 79.0 Hz  
 LKLEV 180  
 LGAIN 24  
 LKPHS 221  
 LKSIG 1163  
 CSPED 13 Hz  
 FILDC  
 FILDF

230.0 220.0 210.0 200.0 190.0 180.0 170.0 160.0 150.0 140.0 130.0 120.0 110.0 100.0 90.0 80.0 70.0 60.0 50.0 40.0 30.0 20.0 10.0 0.0 -10.0 -20.0 -30.0 PPM

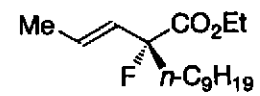

Supplement: c2ob25718a.pdf [file c2ob25718a.pdf]
